# Supplementary material for: Adjusting for age improves identification of gut microbiome alterations in multiple diseases
Source: eLife. 2020 Mar 11;9:e50240. doi: 10.7554/eLife.50240 (PMC7065848; doi:10.7554/eLife.50240)
Supplement: Figure 2—source data 1. — For the disease-specific country bins, the minimum number of diseased samples across any age-groups are indicated. For the Random Forest (RF) based analysis, the training and testing subset sizes (fixed for each disease as 50% of the above number). The shortened notations for the different country used are ESP: Spain; USA: United States, CHN: China, SWE: Sweden, AUT: Austria, FRA: France. [file elife-50240-fig2-data1.xlsx]

## Sheet: Sheet1
Figure 2-source data 1: Number of disease and control samples in different age-groups obtained by collating samples from datasets from the same (A) Countries and (B) Continents as the disease-specific datasets. For the disease-specific country bins, the minimum number of diseased samples across any age-groups are indicated. For the Random Forest (RF) based analysis, the training and testing subse…
(A) Country
Sample Type	Disease Groups	Samples collected from Country	Number of diseased samples in disease-specific country cohorts			Minimum diseased samples in any age-group	Training Size (For RFs)	Testing Size (For RFs)
			Young	Middle	Elderly
Diseased	IBD	ESP, USA	130	125	53	53	27	26
	Cirhosis	CHN	19	77	26	19	10	9
	T2D	CHN, SWE	27	85	102	27	14	13
	CRC	AUT, FRA, USA	45		106	45	23	22
	Adenoma	AUT, FRA	21		68	21	11	10
Sample Type	Disease Groups	Samples collected from Country	Number of control samples in disease-specific country cohorts			Minimum diseased samples in any age-group	Training Size (For RFs) / Subsample Size (LMs)	Testing Size (For RFs)
			Young	Middle	Elderly
Controls	IBD	ESP, USA	229	59	47	53	27	26
	Cirhosis	CHN	114	153	19	19	10	9
	T2D	CHN, SWE	114	153	58	27	14	13
	CRC	AUT, FRA, USA	255		136	45	23	22
	Adenoma	AUT, FRA	24		99	21	11	10
(B) Continent
Sample Type	Disease Groups	Disease Samples collected from Continent	Number of diseased samples in disease-specific continent cohorts
			Young	Middle	Elderly
Diseased	IBD	North America, Europe	130	25	53
	Cirhosis	Asia	19	77	26
	T2D	Asia, Europe	27	85	102
	CRC	North America, Europe	45		106
	Adenoma	Europe	21		68
Sample Type	Disease Groups	Control Samples collected from Continent	Number of control samples in disease-specific continent cohorts
			Young	Middle	Elderly
Diseased	IBD	North America, Europe	248	165	348
	Cirhosis	Asia	114	153	19
	T2D	Asia, Europe	168	281	330
	CRC	North America, Europe	413		348
	Adenoma	Europe	181		311
