# Supplementary material for: Adjusting for age improves identification of gut microbiome alterations in multiple diseases
Source: eLife. 2020 Mar 11;9:e50240. doi: 10.7554/eLife.50240 (PMC7065848; doi:10.7554/eLife.50240)
Supplement: Figure 3—source data 1. [file elife-50240-fig3-data1.xlsx]

## Sheet: Legend
Figure 3-source data 1: Marker scores for the top 85-percentile markers (detected across at least one of the age-groups) for the five diseases, along with the P-values of the comparisons of these scores across age-groups

## Sheet: IBD
	Mean Feature Importance Scores			Comparasion Feature Scores (FDRs)				Top 85 Percentile Marker (Yes: 1; No: 0)
	Young	Middle	Elderly	Kruskal Wallis P-value	Dunn's P (Elderly - Middle)	Dunn's P (Elderly -Young	Dunn's P (Middle -Young	Young	Middle	Elderly
Actinomyces_odontolyticus	0.0167293	0.0520081	0.342285	3.72e-141	4.08697e-59	3.93542e-138	1.22186e-16	0	0	1
Atopobium_parvulum	0.0118269	0.0162808	0.143291	6.46037e-109	2.86213e-75	1.74433e-89	1	0	0	1
Bacteroides_nordii	0.0473081	0.0683086	0.223183	4.71304e-89	3.73864e-46	9.46939e-84	1.25375e-05	0	0	1
Bacteroides_pectinophilus	0.00411287	0.023137	0.239559	8.61026e-149	1.70806e-51	1.3545e-148	2.65782e-25	0	0	1
Bacteroides_salyersiae	0.0345246	0.0461073	0.147928	3.05826e-77	2.04495e-37	4.87564e-74	2.82891e-06	0	0	1
Butyricimonas_synergistica	0.0297227	0.0741777	0.0921139	6.83657e-54	0.00252272	3.84309e-50	2.30136e-29	0	0	1
Clostridium_citroniae	0.0722988	0.0781787	0.455876	1.51917e-124	4.99715e-87	2.69865e-101	1	0	0	1
Clostridium_innocuum	0.0507068	0.0685328	0.246291	1.02262e-103	7.03557e-56	3.46197e-96	1.68787e-05	0	0	1
Collinsella_intestinalis	0.0244197	0.0277212	0.0783935	2.54745e-52	1.10317e-37	2.74519e-42	1	0	0	1
Coprococcus_eutactus	0.0124018	0.0548316	0.096713	1.67771e-86	2.98365e-08	1.62232e-83	4.03108e-40	0	0	1
Gemella_sanguinis	0.0222002	0.0411429	0.102272	5.11632e-77	3.73934e-22	4.97118e-78	3.07092e-17	0	0	1
Granulicatella_adiacens	0.015902	0.0305104	0.0901354	7.30735e-88	3.09094e-32	9.05552e-88	8.73326e-14	0	0	1
Parabacteroides_johnsonii	0.0316332	0.0721774	0.145734	2.27936e-102	9.97011e-22	2.62544e-103	1.30857e-30	0	0	1
Porphyromonas_asaccharolytica	0.0232108	0.0369542	0.0907971	5.4531e-45	1.78439e-22	4.70645e-43	0.00201082	0	0	1
Ruminococcus_champanellensis	0.0139102	0.0431957	0.139662	4.96623e-112	4.78579e-32	3.84171e-113	5.2938e-25	0	0	1
Ruminococcus_flavefaciens	0.0685069	0.0709394	0.277751	8.48261e-88	1.33663e-61	1.31392e-71	1	0	0	1
Solobacterium_moorei	0.0315859	0.075854	0.167978	1.79273e-95	3.85942e-24	1.12016e-96	1.88251e-24	0	0	1
Streptococcus_anginosus	0.0242611	0.0385108	0.0791599	5.89395e-51	9.07327e-17	1.3772e-51	9.68612e-10	0	0	1
Streptococcus_gordonii	0.0108781	0.0399949	0.0855193	1.52758e-116	2.98685e-18	4.8626e-116	1.00117e-42	0	0	1
Streptococcus_infantis	0.0511609	0.0618087	0.312597	9.00139e-119	1.88319e-70	4.47854e-106	0.0010476	0	0	1
Veillonella_dispar	0.0452838	0.0479391	0.147104	3.45943e-65	2.94686e-47	3.97844e-52	1	0	0	1
Bacteroides_plebeius	0.0316642	0.0818185	0.0576715	4.64999e-48	5.27512e-14	3.19501e-11	1.18409e-48	0	1	0
Enterococcus_faecium	0.0521999	0.107828	0.0229416	1.07796e-80	1.04685e-81	4.53881e-22	3.27308e-19	0	1	0
Methanobrevibacter_smithii	0.0644506	0.210221	0.0639758	2.41964e-77	7.61381e-59	1	8.31886e-59	0	1	0
Paraprevotella_clara	0.0509177	0.0994452	0.0342743	1.06407e-56	7.76502e-57	1.76226e-09	1.48265e-20	0	1	0
Acidaminococcus_unclassified	0.0673863	0.130989	0.0493811	4.88644e-39	6.00841e-37	0.00505245	3.86747e-20	0	1	0
Coprococcus_sp_ART55_1	0.0720203	0.120399	0.0514991	6.74226e-47	5.15036e-47	6.74146e-08	4.50717e-17	0	1	0
Methanobrevibacter_unclassified	0.0369692	0.128311	0.0430245	3.62442e-72	2.56352e-49	0.434636	5.95421e-60	0	1	0
Parabacteroides_unclassified	0.0694677	0.0841937	0.0557138	4.14283e-14	4.72246e-14	3.46216e-06	0.082283	0	1	0
Bacteroides_clarus	0.0511118	0.0990014	0.116434	3.10008e-45	0.99249	4.62329e-37	7.26177e-32	0	1	1
Bacteroides_coprocola	0.0443092	0.0820633	0.108193	3.86168e-55	0.00147139	1.28934e-51	1.83786e-29	0	1	1
Bacteroides_eggerthii	0.0515642	0.102035	0.0855002	8.13828e-35	3.72377e-06	8.34969e-13	8.18952e-35	0	1	1
Bacteroides_finegoldii	0.0561033	0.0838545	0.167515	6.20728e-55	4.70206e-17	9.89953e-56	2.57694e-11	0	1	1
Bacteroides_intestinalis	0.0419125	0.0820586	0.163672	1.72214e-76	6.40558e-19	1.36932e-77	3.84749e-20	0	1	1
Butyrivibrio_crossotus	0.0136469	0.143698	0.507686	4.11108e-165	1.18106e-40	1.82805e-166	7.43043e-43	0	1	1
Oxalobacter_formigenes	0.0497235	0.1937	0.123248	1.28824e-73	7.50915e-13	6.73688e-26	8.78499e-74	0	1	1
Parabacteroides_goldsteinii	0.0383865	0.208068	0.170176	1.33846e-101	0.00142635	1.51396e-60	1.035e-90	0	1	1
Paraprevotella_xylaniphila	0.043732	0.0942016	0.140445	2.25689e-65	2.16666e-07	6.09726e-64	1.05089e-28	0	1	1
Phascolarctobacterium_succinatutens	0.0335685	0.0862475	0.135251	3.95395e-82	9.10961e-06	1.97718e-77	3.89951e-42	0	1	1
Coprobacter_fastidiosus	0.0515821	0.0831638	0.538016	1.06007e-140	1.63809e-65	4.05576e-135	1.48259e-12	0	1	1
Granulicatella_unclassified	0.0638998	0.0890906	0.217637	7.88682e-68	3.39591e-37	6.45556e-63	0.001844	0	1	1
Mitsuokella_unclassified	0.0524302	0.101913	0.121158	4.19363e-47	0.00987292	1.67391e-43	2.74223e-26	0	1	1
Olsenella_unclassified	0.0363001	0.0840959	0.0954979	5.50927e-61	0.99249	1.77227e-49	2.3573e-43	0	1	1
Paraprevotella_unclassified	0.0549709	0.116745	0.0740524	1.11406e-43	3.17372e-11	1.06414e-11	3.09467e-44	0	1	1
Sutterella_wadsworthensis	0.0673714	0.0851012	0.122591	1.5185e-14	0.000863324	5.5e-15	0.000526599	0	1	1
Bifidobacterium_animalis	0.0927141	0.0704397	0.0353452	1.37764e-55	3.86177e-36	4.6112e-48	0.699174	1	0	0
Bifidobacterium_pseudocatenulatum	0.0768597	0.0755731	0.0274905	3.46644e-81	1.40892e-66	1.30074e-56	1	1	0	0
Blautia_producta	0.246033	0.0726729	0.0301128	3.06972e-126	8.38396e-20	1.20578e-125	3.67822e-46	1	0	0
Clostridium_ramosum	0.1211	0.0786694	0.0246985	1.26661e-103	6.67188e-50	4.33279e-99	1.89007e-08	1	0	0
Eubacterium_biforme	0.0742495	0.0739476	0.0406577	7.51503e-38	2.56862e-28	9.26717e-30	1	1	0	0
Lactococcus_lactis	0.095766	0.0775782	0.0606279	8.02724e-15	3.77853e-05	3.36217e-15	0.0060435	1	0	0
Streptococcus_vestibularis	0.156404	0.0717991	0.0729009	3.22725e-44	0.99249	6.62903e-36	1.70478e-31	1	0	0
Holdemania_unclassified	0.0835424	0.0756275	0.0415568	8.33122e-50	4.705e-34	7.68512e-42	1	1	0	0
Lachnospiraceae_bacterium_5_1_57FAA	0.147897	0.0501804	0.0234162	4.29044e-115	2.56883e-20	2.75563e-115	3.17244e-39	1	0	0
Lachnospiraceae_bacterium_6_1_63FAA	0.0736988	0.0286201	0.0599512	4.18476e-38	1.59362e-16	6.80568e-05	2.40942e-37	1	0	0
Lachnospiraceae_bacterium_8_1_57FAA	0.092897	0.0557068	0.0391389	1.61457e-37	1.45322e-09	2.84981e-38	7.8425e-10	1	0	0
Lachnospiraceae_bacterium_9_1_43BFAA	0.0931781	0.0309119	0.0537221	1.03064e-52	1.06204e-06	1.81374e-22	7.95009e-52	1	0	0
Roseburia_unclassified	0.0779068	0.0566914	0.0443545	1.04735e-23	3.6405e-08	3.74958e-24	0.000201244	1	0	0
Bacteroides_fragilis	0.107124	0.0743859	0.0775326	4.12331e-19	0.99249	7.81539e-14	1.7333e-15	1	0	1
Clostridium_asparagiforme	0.108196	0.0715331	0.169278	6.23379e-52	9.12784e-53	6.66431e-13	6.42122e-14	1	0	1
Clostridium_nexile	0.0949014	0.0467717	0.120688	8.84075e-37	2.17875e-33	0.0887001	1.88661e-21	1	0	1
Rothia_mucilaginosa	0.0854625	0.0594467	0.227226	2.81258e-87	1.26552e-82	4.35347e-44	3.87314e-06	1	0	1
Streptococcus_sanguinis	0.11181	0.080438	0.16349	5.88447e-35	3.79766e-35	6.00796e-13	1.14515e-05	1	0	1
Clostridiales_bacterium_1_7_47FAA	0.14862	0.0749102	0.103456	3.71438e-34	0.00147139	2.62477e-16	7.26907e-33	1	0	1
Streptococcus_mitis_oralis_pneumoniae	0.0745924	0.0547851	0.196597	1.1461e-82	8.64127e-76	2.18726e-46	0.00102216	1	0	1
Bacteroides_caccae	0.153841	0.125477	0.0671936	1.49219e-73	5.26365e-42	3.86721e-67	0.00504423	1	1	0
Bacteroides_dorei	0.149184	0.151398	0.0719306	5.99842e-83	1.57515e-65	1.20629e-60	1	1	1	0
Bacteroides_faecis	0.0760245	0.102417	0.0535935	8.16639e-50	1.58558e-50	3.28003e-15	1.3486e-10	1	1	0
Bifidobacterium_adolescentis	0.263187	0.139899	0.0661481	2.38728e-122	2.60079e-39	5.84942e-123	2.01923e-23	1	1	0
Bifidobacterium_bifidum	0.176014	0.174933	0.0542797	4.9932e-84	6.57075e-58	1.86217e-69	1	1	1	0
Blautia_hydrogenotrophica	0.114419	0.184397	0.0611081	5.04658e-75	3.00399e-74	3.48019e-30	5.69851e-10	1	1	0
Clostridium_bartlettii	0.240947	0.164981	0.0467133	4.47686e-121	1.43166e-72	1.29135e-107	0.00163877	1	1	0
Clostridium_clostridioforme	0.232182	0.145608	0.0562442	6.98335e-92	7.62076e-39	3.47723e-90	8.9185e-11	1	1	0
Clostridium_scindens	0.100439	0.0931722	0.0548517	8.43622e-30	1.22338e-17	3.60979e-27	0.464665	1	1	0
Dialister_invisus	0.136667	0.107798	0.0550768	7.72219e-75	6.73413e-42	8.1555e-69	0.00201082	1	1	0
Gordonibacter_pamelaeae	0.132689	0.227441	0.0537531	2.3169e-122	1.73572e-121	3.62792e-46	4.20597e-18	1	1	0
Ruminococcus_gnavus	0.327786	0.199656	0.0575773	2.50504e-133	4.50047e-58	9.90701e-130	2.59552e-14	1	1	0
Coprobacillus_unclassified	0.195349	0.113305	0.0425298	1.37741e-106	2.65188e-49	8.69643e-103	7.8425e-10	1	1	0
Erysipelotrichaceae_bacterium_21_3	0.152958	0.0938305	0.0655758	5.26242e-54	4.20355e-16	7.04615e-55	9.62479e-12	1	1	0
Erysipelotrichaceae_bacterium_6_1_45	0.0869716	0.0850147	0.0668352	2.81528e-11	2.02056e-08	3.20444e-09	1	1	1	0
Escherichia_unclassified	0.185966	0.177717	0.0415831	3.77524e-117	1.01935e-84	7.69574e-93	1	1	1	0
Lachnospiraceae_bacterium_1_1_57FAA	0.218693	0.215742	0.0452454	1.40855e-120	4.4971e-91	7.64299e-92	1	1	1	0
Lachnospiraceae_bacterium_1_4_56FAA	0.154965	0.0869626	0.0504839	2.14336e-72	1.90615e-15	2.93453e-73	8.42789e-22	1	1	0
Lachnospiraceae_bacterium_2_1_58FAA	0.142841	0.207429	0.0682641	1.43083e-85	1.19007e-84	3.52618e-34	1.80859e-11	1	1	0
Lachnospiraceae_bacterium_3_1_57FAA_CT1	0.0817762	0.087993	0.0665489	8.42142e-13	3.28834e-11	1.502e-08	1	1	1	0
Peptostreptococcaceae_noname_unclassified	0.125893	0.129856	0.0673598	5.44551e-66	1.27781e-60	3.93955e-37	0.00519562	1	1	0
Akkermansia_muciniphila	0.162025	0.324334	0.26092	3.23766e-44	8.40773e-05	2.3379e-20	7.43043e-43	1	1	1
Alistipes_finegoldii	0.382697	0.35218	0.0860466	3.29344e-112	1.4414e-82	1.0721e-87	1	1	1	1
Alistipes_indistinctus	0.126327	0.261251	0.165562	2.19828e-46	2.56883e-20	1.30658e-05	2.37368e-45	1	1	1
Alistipes_onderdonkii	0.253371	0.245246	0.225309	0.283176	0.99249	0.607524	1	1	1	1
Alistipes_putredinis	0.365174	0.178088	0.134407	2.15197e-67	5.59601e-09	1.06486e-66	2.62195e-27	1	1	1
Alistipes_shahii	0.490376	0.314232	0.396776	2.00999e-24	3.95984e-08	2.82695e-05	1.28678e-24	1	1	1
Anaerostipes_hadrus	0.215324	0.148363	0.0731409	3.82563e-103	3.52975e-51	6.32409e-98	1.31491e-07	1	1	1
Anaerotruncus_colihominis	0.0911651	0.0941278	0.346653	2.08114e-108	2.26128e-77	5.86118e-87	1	1	1	1
Bacteroides_cellulosilyticus	0.191993	0.214729	0.303791	7.65513e-28	5.81313e-16	8.99305e-26	0.332248	1	1	1
Bacteroides_massiliensis	0.0999658	0.109095	0.18781	2.30213e-35	5.16975e-21	4.26661e-32	0.341563	1	1	1
Bacteroides_ovatus	0.249874	0.190855	0.114204	9.64692e-62	4.80765e-30	2.68355e-59	5.12553e-05	1	1	1
Bacteroides_stercoris	0.178562	0.116794	0.108636	7.36538e-20	0.0732326	6.10292e-19	2.98455e-10	1	1	1
Bacteroides_thetaiotaomicron	0.197921	0.164316	0.110202	1.51361e-31	1.05283e-20	2.62001e-27	1	1	1	1
Bacteroides_uniformis	0.21089	0.175683	0.0871504	4.28406e-89	1.04972e-52	5.46352e-80	0.00607688	1	1	1
Bacteroides_vulgatus	0.211304	0.157874	0.153491	5.37155e-16	0.00218713	2.48718e-16	2.02841e-05	1	1	1
Bacteroides_xylanisolvens	0.355379	0.224893	0.160492	1.02059e-47	8.13056e-12	1.3627e-48	9.32071e-13	1	1	1
Barnesiella_intestinihominis	0.107421	0.191836	0.202016	7.61806e-42	0.815126	5.64578e-29	1.14671e-34	1	1	1
Bifidobacterium_longum	0.383311	0.166442	0.128999	5.73012e-96	5.71088e-09	1.73514e-92	1.14736e-44	1	1	1
Bilophila_wadsworthia	0.149089	0.0961088	0.216575	5.19003e-45	2.05881e-45	1.31761e-08	4.74565e-15	1	1	1
Clostridium_bolteae	0.301811	0.167095	0.0997419	4.35546e-73	1.04455e-17	3.88354e-74	1.18049e-19	1	1	1
Clostridium_hathewayi	0.160048	0.108645	0.163427	1.85676e-10	4.48666e-08	1	7.24764e-08	1	1	1
Clostridium_leptum	0.286923	0.235035	0.106335	8.75588e-85	1.26063e-50	7.55991e-76	0.0117638	1	1	1
Clostridium_symbiosum	0.250958	0.0808225	0.124151	2.10635e-74	5.4084e-08	1.74838e-33	2.5165e-72	1	1	1
Collinsella_aerofaciens	0.18266	0.19695	0.103975	8.69281e-53	9.10878e-46	3.73441e-34	0.675404	1	1	1
Coprococcus_catus	0.151795	0.18873	0.105346	5.37463e-49	1.24028e-49	1.88881e-15	5.38287e-10	1	1	1
Coprococcus_comes	0.203975	0.309303	0.140951	3.2938e-74	7.16484e-75	4.84267e-15	2.47814e-23	1	1	1
Desulfovibrio_desulfuricans	0.0787596	0.0810673	0.321298	7.25175e-110	2.42525e-74	1.48309e-91	0.675404	1	1	1
Dorea_formicigenerans	0.27833	0.192473	0.0997711	9.00806e-108	2.41126e-37	6.4901e-108	1.73344e-18	1	1	1
Dorea_longicatena	0.182087	0.194526	0.0858421	5.8554e-92	1.14911e-75	1.15022e-63	1	1	1	1
Eggerthella_lenta	0.175569	0.126546	0.102798	2.33699e-24	1.76811e-08	8.63167e-25	0.000195107	1	1	1
Escherichia_coli	0.247678	0.182726	0.0829742	6.2814e-93	9.40835e-45	5.24775e-89	1.24331e-07	1	1	1
Eubacterium_eligens	0.152616	0.191244	0.106903	2.95541e-55	7.89866e-56	3.18326e-18	1.58235e-10	1	1	1
Eubacterium_hallii	0.315561	0.164871	0.102435	4.56242e-108	1.10204e-27	2.65887e-109	3.13181e-27	1	1	1
Eubacterium_ramulus	0.148713	0.237213	0.12584	2.23384e-59	6.81791e-57	3.07683e-05	7.75119e-29	1	1	1
Eubacterium_rectale	0.237769	0.290948	0.151313	3.45834e-48	2.35514e-45	1.57369e-25	0.00537818	1	1	1
Eubacterium_siraeum	0.159647	0.197929	0.142603	7.29087e-10	1.36777e-09	0.103784	0.000526599	1	1	1
Eubacterium_ventriosum	0.274083	0.183757	0.125277	3.16435e-45	6.83207e-17	2.18353e-45	4.73456e-07	1	1	1
Faecalibacterium_prausnitzii	0.208341	0.255782	0.0868836	8.06168e-112	2.1659e-101	4.88613e-64	0.000232287	1	1	1
Flavonifractor_plautii	0.164476	0.168766	0.0760801	1.03415e-75	2.11826e-57	5.52515e-58	1	1	1	1
Haemophilus_parainfluenzae	0.105543	0.106994	0.176531	1.90996e-17	6.29467e-13	3.24878e-14	1	1	1	1
Holdemania_filiformis	0.122826	0.122564	0.21873	2.09623e-34	3.4987e-26	1.20819e-26	1	1	1	1
Odoribacter_splanchnicus	0.178731	0.117015	0.142986	1.44012e-13	0.0011269	0.000409322	1.44628e-13	1	1	1
Parabacteroides_distasonis	0.175176	0.172308	0.0944488	7.43871e-52	2.48568e-43	1.1942e-35	1	1	1	1
Parabacteroides_merdae	0.154924	0.123257	0.194732	1.65767e-15	6.25362e-16	0.000175633	0.000673205	1	1	1
Prevotella_copri	0.105902	0.0814084	0.246922	3.04666e-73	3.50721e-66	7.30249e-43	0.0110733	1	1	1
Pseudoflavonifractor_capillosus	0.114954	0.135316	0.773625	7.7398e-132	9.66147e-78	6.85835e-118	0.000327984	1	1	1
Roseburia_hominis	0.31894	0.231354	0.268726	3.12532e-10	0.00704358	0.00293418	4.83266e-10	1	1	1
Roseburia_intestinalis	0.181257	0.144078	0.151713	0.0339026	0.99249	0.0901432	0.474492	1	1	1
Roseburia_inulinivorans	0.184306	0.214484	0.155538	1.29249e-21	4.14307e-22	4.96503e-06	2.02841e-05	1	1	1
Ruminococcus_albus	0.155825	0.127654	0.336123	3.54519e-67	4.99894e-58	2.30302e-43	0.418383	1	1	1
Ruminococcus_bromii	0.195312	0.474956	0.162996	3.61566e-86	1.99061e-75	0.0226664	1.2414e-53	1	1	1
Ruminococcus_callidus	0.112346	0.11513	0.11163	0.0329933	0.0354894	0.607524	1	1	1	1
Ruminococcus_lactaris	0.110425	0.226889	0.077289	1.56133e-85	7.27771e-84	2.20413e-10	3.87861e-36	1	1	1
Ruminococcus_obeum	0.254821	0.203999	0.128347	3.92351e-56	1.4994e-27	6.91228e-54	0.000189094	1	1	1
Ruminococcus_torques	0.183884	0.179667	0.0835697	3.64094e-84	1.48648e-58	4.15551e-69	1	1	1	1
Streptococcus_australis	0.146681	0.111825	0.116377	1.17521e-07	0.136127	1.50812e-07	0.00649697	1	1	1
Streptococcus_parasanguinis	0.312235	0.179323	0.0973465	1.37269e-88	4.99593e-25	1.09491e-89	3.55167e-20	1	1	1
Streptococcus_salivarius	0.566983	0.133822	0.0746733	1.34821e-147	5.44843e-24	5.01434e-147	1.11274e-52	1	1	1
Streptococcus_thermophilus	0.329147	0.15079	0.0952559	9.73227e-95	9.07327e-17	4.85583e-95	2.06335e-32	1	1	1
Subdoligranulum_variabile	0.0732701	0.11622	0.401603	7.39234e-129	1.0079e-58	2.14162e-124	2.81536e-12	1	1	1
Veillonella_atypica	0.0813396	0.0845226	0.198411	5.70299e-64	1.34067e-47	4.71848e-50	1	1	1	1
Veillonella_parvula	0.124788	0.148001	0.0761399	2.56026e-38	2.26861e-37	1.10716e-17	0.000797824	1	1	1
Adlercreutzia_equolifaciens	0.159784	0.427353	0.102055	2.89269e-122	2.75784e-121	3.83137e-18	2.94693e-46	1	1	1
Alistipes_senegalensis	0.13962	0.122814	0.190133	1.06136e-10	1.53763e-08	3.38939e-08	1	1	1	1
Anaerotruncus_unclassified	0.189064	0.113555	0.262937	6.877e-61	1.08513e-61	4.18214e-18	2.7817e-13	1	1	1
Bacteroidales_bacterium_ph8	0.181337	0.207786	0.177245	2.22195e-07	1.18397e-05	1	3.52121e-05	1	1	1
Bilophila_unclassified	0.191399	0.148481	0.192384	4.65602e-10	0.00184317	0.0152392	8.04927e-10	1	1	1
Burkholderiales_bacterium_1_1_47	0.108623	0.0942081	0.160283	3.1775e-21	5.47718e-18	1.00834e-14	1	1	1	1
Clostridiaceae_bacterium_JC118	0.10838	0.110757	0.129824	0.232415	0.738357	0.464129	1	1	1	1
Eggerthella_unclassified	0.377774	0.177898	0.0779788	2.26269e-133	4.72254e-35	1.12216e-134	1.40986e-32	1	1	1
Erysipelotrichaceae_bacterium_2_2_44A	0.170772	0.106114	0.0912643	1.99795e-24	1.31549e-05	5.21891e-25	2.39117e-07	1	1	1
Lachnospiraceae_bacterium_3_1_46FAA	0.157895	0.274081	0.137384	1.80419e-56	1.24028e-49	0.0908683	3.0856e-35	1	1	1
Lachnospiraceae_bacterium_5_1_63FAA	0.373643	0.203039	0.0933755	2.62595e-125	7.61089e-43	1.93045e-125	7.54429e-22	1	1	1
Lachnospiraceae_bacterium_7_1_58FAA	0.202487	0.176904	0.109294	1.4301e-49	9.47038e-29	2.9375e-45	0.0608423	1	1	1
Oscillibacter_unclassified	0.190457	0.178702	0.0840729	9.58257e-94	2.82233e-67	4.65146e-75	1	1	1	1
Parasutterella_excrementihominis	0.135393	0.0905476	0.228251	6.31944e-49	1.01866e-48	2.31499e-19	7.28661e-07	1	1	1
Ruminococcaceae_bacterium_D16	0.117178	0.166578	0.129612	1.99018e-20	2.23087e-12	0.333022	2.69602e-18	1	1	1
Ruminococcus_sp_5_1_39BFAA	0.231854	0.224448	0.0850502	2.44708e-94	4.43797e-78	1.03503e-64	1	1	1	1
Subdoligranulum_unclassified	0.225289	0.302548	0.0896174	1.16537e-113	1.94848e-107	3.7214e-57	5.38958e-08	1	1	1
Veillonella_unclassified	0.149394	0.123387	0.16722	5.88721e-08	1.96111e-07	0.464129	0.000550202	1	1	1

## Sheet: Cirrhosis
	Mean Feature Importance Scores			Comparasion Feature Scores (FDRs)				Top 85 Percentile Marker (Yes: 1; No: 0)
	Young	Middle	Elderly	Kruskal Wallis P-value	Dunn's P (Elderly - Middle)	Dunn's P (Elderly -Young	Dunn's P (Middle -Young	Young	Middle	Elderly
Bacteroides_oleiciplenus	0.0113123	0.0198141	0.0389035	4.80202e-30	1.78729e-08	5.31133e-31	5.12883e-07	0	0	1
Butyricimonas_synergistica	0.0400603	0.0177402	0.0455134	1.83899e-29	4.10689e-30	1.85379e-05	4.02689e-10	0	0	1
Clostridium_asparagiforme	0.0240965	0.0324978	0.0415619	4.81311e-15	5.70781e-06	1.60107e-15	0.0334939	0	0	1
Collinsella_aerofaciens	0.0344762	0.0375593	0.0859695	2.20023e-61	5.56374e-45	8.18078e-49	1	0	0	1
Ruminococcus_callidus	0.0360629	0.0238935	0.0418698	3.36817e-07	1.47623e-07	0.0122119	0.200691	0	0	1
Streptococcus_australis	0.0201173	0.0291342	0.0770626	3.32757e-62	3.94555e-34	8.06922e-58	0.00422883	0	0	1
Streptococcus_mutans	0.0140215	0.0340861	0.037094	1.86493e-22	1	1.2393e-19	4.25354e-15	0	0	1
Alistipes_senegalensis	0.0279288	0.0307013	0.0600787	3.67625e-30	1.79805e-23	2.76671e-23	1	0	0	1
Akkermansia_muciniphila	0.0206042	0.0444043	0.0223014	1.14961e-16	5.81348e-11	1	7.64524e-15	0	1	0
Eggerthella_unclassified	0.0326984	0.0523889	0.0325977	4.36231e-14	1.67971e-11	1	1.19814e-10	0	1	0
Ruminococcus_sp_5_1_39BFAA	0.0292536	0.0397737	0.0172919	3.4091e-22	6.58053e-23	3.6479e-07	0.000150653	0	1	0
Bifidobacterium_pseudocatenulatum	0.0298326	0.0525232	0.0477788	2.71492e-12	1	4.84673e-08	3.61912e-11	0	1	1
Clostridium_citroniae	0.0254362	0.0408354	0.0399609	2.14995e-17	1	5.54714e-16	7.67682e-11	0	1	1
Clostridium_perfringens	0.0195728	0.0511852	0.0404608	3.3217e-29	1	1.372e-19	2.6494e-25	0	1	1
Dorea_formicigenerans	0.0333076	0.0599038	0.0767633	8.92426e-36	0.00275276	5.46228e-35	5.50503e-17	0	1	1
Eubacterium_ramulus	0.0306262	0.0582605	0.0369053	5.23188e-19	7.95328e-06	0.000273745	1.00064e-19	0	1	1
Eubacterium_ventriosum	0.0365145	0.0949009	0.0629747	2.26408e-24	0.135279	4.90445e-13	2.36344e-23	0	1	1
Flavonifractor_plautii	0.039326	0.0541325	0.128885	2.00935e-77	2.21737e-41	2.62468e-72	0.000258459	0	1	1
Lactobacillus_mucosae	0.0178752	0.0639099	0.0521605	1.46953e-47	0.896699	5.07969e-31	3.03878e-41	0	1	1
Prevotella_buccae	0.0206415	0.0861308	0.153059	8.21112e-96	1.73988e-15	8.2769e-96	2.28369e-34	0	1	1
Clostridiales_bacterium_1_7_47FAA	0.0329087	0.0472713	0.0374544	1.93371e-05	0.0848668	0.248011	1.03397e-05	0	1	1
Lachnospiraceae_bacterium_7_1_58FAA	0.0341592	0.0453755	0.0523297	4.37129e-08	0.868141	3.14721e-08	0.000572745	0	1	1
Parabacteroides_unclassified	0.0373752	0.0401027	0.0545451	2.41684e-05	0.00112794	7.15788e-05	1	0	1	1
Clostridium_ramosum	0.0454087	0.0352762	0.0305508	6.4173e-06	1	0.00079846	1.48113e-05	1	0	0
Desulfovibrio_desulfuricans	0.0441511	0.0256405	0.0185924	8.76253e-11	0.00654093	1.81591e-11	0.00803547	1	0	0
Haemophilus_haemolyticus	0.107204	0.0243433	0.0125587	1.91207e-102	5.81944e-06	1.13401e-95	4.89381e-54	1	0	0
Parabacteroides_goldsteinii	0.055917	0.0391662	0.0338989	0.00575422	1	0.00850952	0.0638686	1	0	0
Streptococcus_infantis	0.0557643	0.0301816	0.0157045	1.32931e-31	3.36678e-08	1.33919e-32	4.64383e-08	1	0	0
Aggregatibacter_segnis	0.0967762	0.0351887	0.0097661	1.12698e-106	8.57002e-23	1.06953e-107	1.49139e-31	1	0	0
Campylobacter_concisus	0.0611953	0.0347762	0.0172487	8.51554e-45	4.09922e-12	7.51056e-46	7.86876e-11	1	0	0
Bacteroides_clarus	0.0807184	0.0329811	0.0457809	1.56048e-34	3.15098e-07	9.981e-11	2.22964e-35	1	0	1
Odoribacter_splanchnicus	0.058165	0.0336787	0.041249	7.10411e-18	0.00127323	6.09628e-06	1.55469e-18	1	0	1
Escherichia_unclassified	0.0460863	0.0306528	0.0394576	3.94335e-08	0.000773072	0.427995	2.84396e-08	1	0	1
Lachnospiraceae_bacterium_3_1_46FAA	0.0648225	0.0384272	0.0531246	2.62027e-09	3.56499e-07	1	1.21672e-07	1	0	1
Paraprevotella_unclassified	0.060564	0.0336169	0.0410769	5.60817e-15	0.00110241	0.000247611	1.14735e-15	1	0	1
Alistipes_finegoldii	0.0418669	0.0409346	0.0337016	1.93371e-05	0.124532	7.8257e-06	0.252201	1	1	0
Bacteroides_eggerthii	0.0430481	0.0406463	0.0325423	0.000266746	0.000504582	0.010841	1	1	1	0
Dialister_invisus	0.057508	0.0455115	0.0268171	2.88444e-13	0.000364631	5.72321e-14	0.00776364	1	1	0
Fusobacterium_mortiferum	0.0598831	0.0602959	0.0337101	1.84937e-09	3.83751e-06	9.81975e-09	1	1	1	0
Holdemania_filiformis	0.0502501	0.0518133	0.0342982	0.000995202	0.0155678	0.00191017	1	1	1	0
Ruminococcus_lactaris	0.0430849	0.0452146	0.0298099	4.59696e-10	2.56823e-07	1.12935e-08	1	1	1	0
Streptococcus_gordonii	0.0679143	0.0421221	0.0330546	1.61377e-17	1	3.84195e-16	7.67682e-11	1	1	0
Actinobacillus_unclassified	0.11692	0.0616211	0.0158196	7.28357e-107	1.43995e-34	1.70069e-107	2.87309e-20	1	1	0
Anaerotruncus_unclassified	0.0494066	0.042587	0.0254425	1.8644e-05	0.00130187	4.10758e-05	1	1	1	0
Bacteroidales_bacterium_ph8	0.0447488	0.0402533	0.0365127	0.963147	1	1	1	1	1	0
Coprobacillus_unclassified	0.0532021	0.0768344	0.0324762	5.61373e-23	8.39199e-24	4.05014e-06	7.09728e-06	1	1	0
Lachnospiraceae_bacterium_1_1_57FAA	0.0931903	0.0525259	0.033935	5.547e-43	9.85741e-08	1.12098e-43	1.18101e-14	1	1	0
Lachnospiraceae_bacterium_2_1_58FAA	0.0578084	0.0572992	0.0362219	1.00416e-09	5.52356e-06	3.41432e-09	1	1	1	0
Peptostreptococcaceae_noname_unclassified	0.0618185	0.0515156	0.0308864	7.08753e-21	2.22338e-11	5.44821e-20	0.321317	1	1	0
Streptococcus_mitis_oralis_pneumoniae	0.0943396	0.062682	0.0300513	2.20957e-48	8.38488e-14	2.11896e-49	5.56425e-11	1	1	0
Alistipes_indistinctus	0.0452449	0.0487681	0.114964	5.65791e-59	2.29423e-44	7.17443e-46	1	1	1	1
Alistipes_onderdonkii	0.0418493	0.0421371	0.0527409	2.39365e-07	1.00136e-06	6.0337e-05	1	1	1	1
Alistipes_putredinis	0.0750961	0.0524723	0.0884503	3.43199e-22	2.07933e-22	0.00457717	3.41021e-09	1	1	1
Alistipes_shahii	0.0762506	0.0590649	0.0404596	3.71256e-21	1.48274e-05	4.90146e-22	1.89884e-05	1	1	1
Anaerostipes_hadrus	0.0403037	0.0502375	0.0442628	0.841172	1	1	1	1	1	1
Bacteroides_caccae	0.0441223	0.0591183	0.0933062	5.8172e-43	4.20904e-22	4.92726e-41	0.00690276	1	1	1
Bacteroides_cellulosilyticus	0.050939	0.0575998	0.0677683	1.23985e-08	0.000117706	1.3916e-08	1	1	1	1
Bacteroides_coprocola	0.066131	0.061472	0.0809319	5.2508e-08	1.89025e-08	0.0189627	0.0592775	1	1	1
Bacteroides_dorei	0.0521694	0.0545502	0.0613162	0.00415342	0.288636	0.00253674	1	1	1	1
Bacteroides_faecis	0.0552744	0.0527741	0.0519335	0.963147	1	1	1	1	1	1
Bacteroides_finegoldii	0.0422441	0.0440129	0.0365995	0.0150465	0.0805826	0.0294481	1	1	1	1
Bacteroides_fragilis	0.0447884	0.0650632	0.0655077	9.61928e-16	1	4.33374e-13	1.11943e-11	1	1	1
Bacteroides_intestinalis	0.0607691	0.0455539	0.0643604	5.49366e-08	2.87099e-08	0.197987	0.00402468	1	1	1
Bacteroides_massiliensis	0.0601142	0.0589117	0.0778638	1.32576e-12	1.46138e-11	4.80569e-08	1	1	1	1
Bacteroides_ovatus	0.0567155	0.0574268	0.0454437	9.96084e-06	0.000651699	3.10488e-05	1	1	1	1
Bacteroides_plebeius	0.0758022	0.059414	0.0678656	3.14393e-06	6.69922e-06	1	0.000864006	1	1	1
Bacteroides_stercoris	0.06916	0.0631152	0.0628851	0.413251	1	1	1	1	1	1
Bacteroides_thetaiotaomicron	0.0526247	0.0517435	0.0657108	0.0146201	0.0961038	0.0233828	1	1	1	1
Bacteroides_uniformis	0.105532	0.070444	0.0550496	2.14731e-25	0.00112794	9.04715e-26	4.56763e-10	1	1	1
Bacteroides_vulgatus	0.0605524	0.0500384	0.0529337	0.0370902	1	0.879461	0.0475669	1	1	1
Bacteroides_xylanisolvens	0.0517182	0.0583525	0.0561823	0.0401279	1	0.0346428	1	1	1	1
Bifidobacterium_dentium	0.0445574	0.101787	0.0611723	8.78481e-32	6.51767e-13	0.000226149	6.426e-32	1	1	1
Bifidobacterium_longum	0.0469696	0.0482216	0.0901854	7.90005e-33	4.47748e-27	1.40961e-23	1	1	1	1
Bilophila_wadsworthia	0.0956306	0.0577713	0.0442536	1.31295e-25	0.154525	1.99125e-24	6.80818e-14	1	1	1
Clostridium_bartlettii	0.0405139	0.0506746	0.0423901	2.51395e-05	0.0245062	0.676137	1.9853e-05	1	1	1
Clostridium_bolteae	0.0493645	0.0491928	0.0455394	0.276945	1	1	0.629556	1	1	1
Clostridium_hathewayi	0.0711049	0.0698416	0.0443272	1.49221e-08	1.94055e-05	4.82128e-08	1	1	1	1
Clostridium_nexile	0.100075	0.0835572	0.0920954	0.00575422	0.124532	1	0.00781362	1	1	1
Clostridium_symbiosum	0.0493668	0.0597939	0.0629625	0.000187744	0.633409	9.30071e-05	0.172197	1	1	1
Coprococcus_catus	0.0482492	0.0510321	0.0497885	0.963147	1	1	1	1	1	1
Coprococcus_comes	0.0753095	0.0929874	0.115863	5.57391e-12	4.92371e-06	5.92511e-12	0.531066	1	1	1
Dorea_longicatena	0.0599485	0.0804416	0.0534983	5.24441e-11	2.35415e-09	1	5.34508e-08	1	1	1
Escherichia_coli	0.0444723	0.0492286	0.05741	4.75807e-07	0.00222787	3.08218e-07	0.870558	1	1	1
Eubacterium_eligens	0.046527	0.0574018	0.053688	0.0168712	1	0.0361383	0.0825996	1	1	1
Eubacterium_hallii	0.0679344	0.0690405	0.0530521	0.193665	0.386662	1	1	1	1	1
Eubacterium_rectale	0.045127	0.0602907	0.0454	8.75725e-06	0.000256226	1	6.5954e-05	1	1	1
Faecalibacterium_prausnitzii	0.0450293	0.0561152	0.0474123	0.193665	0.847816	1	0.531066	1	1	1
Fusobacterium_nucleatum	0.101544	0.0746141	0.0593788	1.4258e-16	0.100699	1.24189e-16	1.00376e-07	1	1	1
Haemophilus_parainfluenzae	0.218224	0.141222	0.11568	1.85093e-48	0.00806246	1.24355e-45	5.98808e-26	1	1	1
Klebsiella_pneumoniae	0.0632131	0.048137	0.0489003	0.010495	1	0.29054	0.0101852	1	1	1
Lactobacillus_salivarius	0.0847092	0.163696	0.210623	7.63703e-58	4.18486e-07	2.80746e-57	4.18214e-24	1	1	1
Parabacteroides_distasonis	0.0433238	0.0530643	0.0641428	4.2783e-10	0.000692124	1.35043e-10	0.11679	1	1	1
Parabacteroides_merdae	0.0762602	0.0508394	0.0505698	1.74857e-12	1	1.89846e-08	3.95572e-11	1	1	1
Prevotella_copri	0.0505383	0.094395	0.0760778	4.90967e-26	1	2.32764e-17	9.84504e-23	1	1	1
Prevotella_stercorea	0.072872	0.0733858	0.0443901	7.37554e-07	0.00174133	5.74497e-07	1	1	1	1
Roseburia_hominis	0.0559575	0.0414688	0.0419265	0.0176101	1	0.0543386	0.0662894	1	1	1
Roseburia_intestinalis	0.0638473	0.0552591	0.0674285	1.32653e-07	4.91805e-08	0.0426403	0.0394005	1	1	1
Roseburia_inulinivorans	0.0418992	0.0473087	0.0699144	3.69311e-26	2.05124e-14	8.43076e-25	0.203439	1	1	1
Rothia_mucilaginosa	0.0576651	0.0455926	0.0468365	0.0988629	1	0.86135	0.147501	1	1	1
Ruminococcus_bromii	0.0640619	0.0513251	0.0485771	3.78433e-07	1	7.87038e-06	1.1092e-05	1	1	1
Ruminococcus_gnavus	0.0757219	0.0648996	0.0608278	0.0149936	1	0.0290437	0.0776517	1	1	1
Ruminococcus_obeum	0.0508179	0.0664576	0.0469044	7.80072e-05	0.000126683	1	0.00970579	1	1	1
Ruminococcus_torques	0.0570577	0.0609584	0.0455241	0.143555	0.397531	0.337341	1	1	1	1
Streptococcus_anginosus	0.164356	0.190001	0.186641	0.143555	1	0.262909	0.531066	1	1	1
Streptococcus_parasanguinis	0.111138	0.173417	0.172273	4.90332e-25	1	1.41772e-22	9.70574e-16	1	1	1
Streptococcus_salivarius	0.122962	0.0991169	0.0678716	5.33565e-28	1.39835e-08	7.22807e-29	6.51421e-06	1	1	1
Streptococcus_vestibularis	0.166475	0.0748648	0.0398922	2.35224e-72	7.58179e-13	6.77862e-73	1.34804e-24	1	1	1
Veillonella_atypica	0.197624	0.209608	0.251646	1.91082e-14	9.10126e-08	4.52372e-14	0.583181	1	1	1
Veillonella_dispar	0.243037	0.209355	0.263886	1.41655e-12	6.97208e-13	0.0543386	3.81539e-05	1	1	1
Veillonella_parvula	0.185559	0.192829	0.145896	5.6023e-09	1.03512e-08	4.25356e-05	1	1	1	1
Adlercreutzia_equolifaciens	0.0560026	0.0475342	0.0622298	8.75436e-07	5.20629e-07	0.00636663	0.531066	1	1	1
Bilophila_unclassified	0.136638	0.0799986	0.0502515	6.92358e-49	2.98314e-07	4.35016e-49	1.25086e-18	1	1	1
Lachnospiraceae_bacterium_5_1_63FAA	0.0450871	0.0587133	0.0578245	7.43935e-05	1	0.000526169	0.000781868	1	1	1
Megamonas_unclassified	0.052362	0.0469987	0.0623786	0.000131782	0.000114098	0.86135	0.0568213	1	1	1
Megasphaera_micronuciformis	0.124494	0.106547	0.267237	7.67121e-75	2.03723e-66	8.73056e-46	0.0634514	1	1	1
Oscillibacter_unclassified	0.101505	0.0544848	0.0698555	1.39962e-14	0.00824363	4.02714e-05	3.80925e-15	1	1	1
Subdoligranulum_unclassified	0.059881	0.135273	0.138792	5.69316e-56	1	1.56428e-43	3.47161e-42	1	1	1
Veillonella_unclassified	0.156089	0.209512	0.213603	1.52776e-19	1	3.25384e-17	4.2446e-13	1	1	1

## Sheet: T2D
	Mean Feature Importance Scores			Comparasion Feature Scores (FDRs)				Top 85 Percentile Marker (Yes: 1; No: 0)
	Young	Middle	Elderly	Kruskal Wallis P-value	Dunn's P (Elderly - Middle)	Dunn's P (Elderly -Young	Dunn's P (Middle -Young	Young	Middle	Elderly
Akkermansia_muciniphila	0.0502842	0.0450926	0.0980522	1.43246e-52	3.16247e-42	6.0778e-35	1	0	0	1
Bifidobacterium_adolescentis	0.0377826	0.0322454	0.0731891	4.45218e-59	5.09437e-53	1.93741e-31	0.008893	0	0	1
Clostridium_clostridioforme	0.0245025	0.0510484	0.0610123	8.72746e-33	1	1.25365e-25	7.29174e-22	0	0	1
Eggerthella_lenta	0.051545	0.0595224	0.0746968	6.51985e-05	0.51	0.000929592	0.788094	0	0	1
Eubacterium_siraeum	0.0533813	0.0357399	0.0957786	1.10291e-63	1.44573e-62	7.46261e-19	8.41686e-13	0	0	1
Gordonibacter_pamelaeae	0.0323751	0.031822	0.0572258	5.49594e-31	1.44047e-24	3.01778e-20	1	0	0	1
Methanobrevibacter_smithii	0.0254797	0.0163396	0.0616734	5.6033e-81	1.10544e-76	8.16741e-36	1.0439e-07	0	0	1
Pseudoflavonifractor_capillosus	0.0207133	0.0121534	0.0700873	5.57123e-92	2.70187e-85	4.28317e-45	2.33203e-06	0	0	1
Streptococcus_thermophilus	0.0160718	0.0114565	0.114818	1.05827e-120	4.2388e-102	6.28585e-76	0.0647306	0	0	1
Subdoligranulum_variabile	0.0164179	0.023175	0.0759589	2.43763e-96	4.03043e-57	1.12953e-83	0.0170713	0	0	1
Bacteroidales_bacterium_ph8	0.0574904	0.0515503	0.0976746	9.7518e-27	8.7269e-22	1.82876e-16	1	0	0	1
Butyrivibrio_unclassified	0.0442264	0.0399332	0.0781595	6.15268e-19	1.8975e-17	5.20203e-07	0.0229511	0	0	1
Holdemania_unclassified	0.0589937	0.036598	0.0619099	2.25789e-26	3.30652e-17	1	1.31295e-20	0	0	1
Mitsuokella_unclassified	0.0328446	0.0390011	0.0605539	1.48219e-31	3.87548e-21	1.28149e-24	1	0	0	1
Bacteroides_nordii	0.0631197	0.0723608	0.0475035	2.08224e-17	2.69035e-12	2.55469e-12	1	0	1	0
Clostridium_nexile	0.0642506	0.0684218	0.0311324	2.01769e-58	1.95531e-49	9.13295e-36	0.470237	0	1	0
Clostridium_ramosum	0.0479323	0.0623837	0.0562465	8.72707e-05	0.51	0.665279	0.00162927	0	1	0
Parabacteroides_goldsteinii	0.0658525	0.064952	0.0533211	9.02455e-10	8.07684e-07	3.1351e-06	1	0	1	0
Prevotella_stercorea	0.0432923	0.115091	0.0135037	1.92045e-101	4.87293e-99	8.58374e-37	3.54102e-15	0	1	0
Streptococcus_sanguinis	0.0269022	0.069461	0.044696	1.79459e-25	1	3.7357e-17	1.98662e-19	0	1	0
Veillonella_atypica	0.0557105	0.0945073	0.049563	9.62772e-22	2.36985e-20	0.0035752	1.64125e-07	0	1	0
Veillonella_dispar	0.0487578	0.0770692	0.0485683	5.19668e-09	1.31383e-07	0.566285	0.00300664	0	1	0
Lachnospiraceae_bacterium_3_1_57FAA_CT1	0.0529978	0.067176	0.0550398	0.0267514	0.735455	1	0.790197	0	1	0
Megasphaera_unclassified	0.0435365	0.111617	0.0382183	1.26816e-61	1.23994e-55	0.00305439	2.99465e-32	0	1	0
Clostridium_leptum	0.0528853	0.0672258	0.0831071	7.60354e-21	4.45717e-08	3.09005e-19	0.0218316	0	1	1
Streptococcus_australis	0.0578888	0.0655296	0.0698082	0.000159257	1	0.00362928	0.127095	0	1	1
Streptococcus_parasanguinis	0.0609295	0.0770194	0.101573	1.37824e-31	1.2103e-13	2.82536e-29	0.00620166	0	1	1
Anaerotruncus_unclassified	0.056214	0.0814938	0.0865421	1.8397e-18	1	1.13878e-14	3.52096e-11	0	1	1
Lachnospiraceae_bacterium_3_1_46FAA	0.0651051	0.069516	0.10355	8.30899e-24	8.02036e-14	7.86481e-20	1	0	1	1
Bacteroides_salyersiae	0.0780763	0.0603781	0.0310985	1.69518e-61	1.20175e-25	1.59321e-58	1.06308e-06	1	0	0
Butyricimonas_synergistica	0.0674473	0.0479002	0.0280056	4.82612e-53	1.00602e-19	4.29621e-51	2.29809e-07	1	0	0
Desulfovibrio_desulfuricans	0.0714758	0.048157	0.0562735	2.40147e-13	0.000120046	0.080824	6.55866e-12	1	0	0
Granulicatella_adiacens	0.071252	0.0341816	0.0223525	5.36295e-54	8.19892e-07	1.10919e-51	3.84553e-21	1	0	0
Parabacteroides_johnsonii	0.0659545	0.0550364	0.0387641	1.73784e-26	3.10458e-08	2.76985e-25	0.000119375	1	0	0
Barnesiella_intestinihominis	0.0691805	0.0476805	0.0877585	6.88959e-27	1.15724e-24	0.0187879	1.19122e-11	1	0	1
Ruminococcus_callidus	0.0694487	0.0442714	0.0609312	2.34857e-18	4.68755e-07	0.0357216	1.06566e-16	1	0	1
Ruminococcus_lactaris	0.102545	0.0570483	0.0953502	1.93692e-18	4.23011e-14	1	8.28763e-12	1	0	1
Adlercreutzia_equolifaciens	0.0719724	0.0522186	0.126988	2.57356e-55	1.17338e-52	9.63266e-23	3.26007e-06	1	0	1
Erysipelotrichaceae_bacterium_2_2_44A	0.0909761	0.058314	0.0582792	5.2733e-25	1	2.24926e-15	3.2248e-20	1	0	1
Parasutterella_excrementihominis	0.0818333	0.0594796	0.059267	9.38979e-18	1	2.30878e-12	1.16282e-12	1	0	1
Ruminococcus_sp_5_1_39BFAA	0.0694632	0.0535909	0.0774278	1.07952e-10	5.37277e-08	1	3.26007e-06	1	0	1
Bacteroides_clarus	0.0826168	0.0658341	0.0471884	8.61872e-32	5.06068e-06	1.28795e-30	1.51726e-09	1	1	0
Bacteroides_coprocola	0.0819683	0.112079	0.0438901	2.92644e-51	2.97597e-48	2.67446e-22	5.86058e-05	1	1	0
Bacteroides_eggerthii	0.0731192	0.080025	0.056464	3.19074e-08	3.03378e-05	1.7368e-05	1	1	1	0
Bacteroides_faecis	0.101856	0.0872299	0.0489303	4.79868e-54	8.70398e-29	2.28986e-48	0.0170713	1	1	0
Bacteroides_finegoldii	0.0705982	0.0791779	0.0384134	2.33243e-42	2.09289e-36	1.46428e-24	0.407199	1	1	0
Bacteroides_intestinalis	0.106367	0.0875964	0.0557927	2.32142e-43	9.19147e-16	1.2133e-41	3.41267e-06	1	1	0
Bacteroides_plebeius	0.0971239	0.118752	0.0466078	2.2136e-57	4.88619e-52	1.68402e-29	0.0036692	1	1	0
Bifidobacterium_pseudocatenulatum	0.0760086	0.0864365	0.0429696	1.23376e-38	2.31983e-31	8.91851e-25	1	1	1	0
Haemophilus_parainfluenzae	0.183472	0.109678	0.0524785	6.80641e-92	6.98581e-30	2.30507e-90	2.12501e-16	1	1	0
Klebsiella_pneumoniae	0.0826121	0.0897981	0.053091	3.88984e-26	5.67311e-24	2.18908e-11	0.0231554	1	1	0
Streptococcus_anginosus	0.0697982	0.0739373	0.0524741	6.57949e-06	0.00793401	0.000331764	1	1	1	0
Megamonas_unclassified	0.0903096	0.0648013	0.0345207	5.26426e-58	8.55885e-25	6.60532e-55	6.18045e-06	1	1	0
Alistipes_finegoldii	0.0770051	0.0683935	0.0984716	1.12159e-13	5.20019e-12	1.02153e-05	0.407199	1	1	1
Alistipes_indistinctus	0.179913	0.0755485	0.0856885	4.8058e-70	1	1.38499e-45	1.7061e-57	1	1	1
Alistipes_onderdonkii	0.0941028	0.0800453	0.136284	1.24681e-24	6.98235e-23	9.48271e-10	0.00909079	1	1	1
Alistipes_putredinis	0.0861171	0.0854193	0.101884	3.01785e-07	3.21308e-05	0.000678291	1	1	1	1
Alistipes_shahii	0.0892116	0.0841381	0.125676	1.92288e-16	2.52197e-14	1.04443e-07	0.534259	1	1	1
Anaerostipes_hadrus	0.078079	0.120562	0.106088	1.58378e-15	1	6.02387e-10	1.25651e-11	1	1	1
Anaerotruncus_colihominis	0.0780007	0.0818287	0.0784134	0.681215	1	1	1	1	1	1
Bacteroides_caccae	0.109773	0.11353	0.0966774	0.00752916	0.186772	0.442511	1	1	1	1
Bacteroides_cellulosilyticus	0.123206	0.0857412	0.134996	1.56731e-13	1.45506e-09	1	4.89812e-09	1	1	1
Bacteroides_dorei	0.111649	0.109131	0.121032	0.00491982	0.211795	0.17889	1	1	1	1
Bacteroides_fragilis	0.0893796	0.0993988	0.0854288	0.000373085	0.00521286	0.816583	0.885656	1	1	1
Bacteroides_massiliensis	0.0894523	0.137675	0.0664528	2.541e-40	3.38727e-39	5.99007e-12	6.48104e-08	1	1	1
Bacteroides_ovatus	0.111402	0.113978	0.123394	0.100682	1	1	1	1	1	1
Bacteroides_stercoris	0.0990975	0.120988	0.0943203	2.12315e-10	2.79576e-09	0.0202423	0.0304579	1	1	1
Bacteroides_thetaiotaomicron	0.111716	0.100241	0.113651	0.00323983	0.0458802	1	1	1	1	1
Bacteroides_uniformis	0.0979318	0.106639	0.0947063	0.000903664	0.0451264	1	0.0757598	1	1	1
Bacteroides_vulgatus	0.096183	0.118585	0.0962118	8.15089e-07	0.000438734	1	0.000217517	1	1	1
Bacteroides_xylanisolvens	0.0955557	0.114164	0.0913876	1.00868e-08	3.62063e-07	0.988408	0.0016217	1	1	1
Bifidobacterium_longum	0.0679897	0.0974858	0.115586	1.50729e-27	0.006482	1.4585e-25	2.60097e-11	1	1	1
Bilophila_wadsworthia	0.0878659	0.0877857	0.0865621	0.281116	1	1	1	1	1	1
Clostridium_asparagiforme	0.0796052	0.0955594	0.130326	2.2588e-20	1.73706e-10	1.31533e-17	0.706513	1	1	1
Clostridium_bartlettii	0.0895036	0.0883838	0.123003	5.79704e-08	3.9265e-06	0.000678291	1	1	1	1
Clostridium_bolteae	0.207662	0.125711	0.139414	3.23923e-25	1	1.53676e-14	4.46276e-21	1	1	1
Clostridium_citroniae	0.157439	0.11304	0.0947233	1.16362e-29	0.457085	1.26089e-25	3.15854e-16	1	1	1
Clostridium_hathewayi	0.108246	0.132933	0.116267	5.01075e-05	0.0031316	1	0.0170713	1	1	1
Clostridium_symbiosum	0.105495	0.0774244	0.105165	4.21454e-11	1.94239e-05	1	5.28081e-09	1	1	1
Collinsella_aerofaciens	0.0935139	0.074614	0.095948	5.96147e-09	1.62719e-07	0.665279	0.00251767	1	1	1
Coprococcus_catus	0.077766	0.0741338	0.112327	8.93746e-26	1.29051e-20	2.56007e-16	1	1	1	1
Coprococcus_comes	0.0868778	0.0856009	0.135045	6.45398e-24	2.05468e-20	3.70976e-13	0.858212	1	1	1
Dorea_formicigenerans	0.099755	0.100131	0.0995686	0.950207	1	1	1	1	1	1
Dorea_longicatena	0.0948855	0.096467	0.102921	0.0126136	0.305159	0.469475	1	1	1	1
Escherichia_coli	0.101328	0.09958	0.101549	0.111754	1	1	1	1	1	1
Eubacterium_eligens	0.104349	0.125243	0.109023	0.000938332	0.611797	1	0.0181014	1	1	1
Eubacterium_hallii	0.09821	0.0981749	0.117791	6.2043e-06	0.000104714	0.0772356	1	1	1	1
Eubacterium_ramulus	0.093534	0.0813475	0.103738	2.22061e-10	4.37101e-09	0.203637	0.00226331	1	1	1
Eubacterium_rectale	0.0887561	0.127965	0.118634	5.67788e-14	1	9.90954e-10	1.36509e-09	1	1	1
Eubacterium_ventriosum	0.0814528	0.0858609	0.0895847	0.779987	1	1	1	1	1	1
Faecalibacterium_prausnitzii	0.197759	0.13879	0.12767	4.75587e-29	0.0377459	2.40227e-26	1.63539e-13	1	1	1
Flavonifractor_plautii	0.0903413	0.0796118	0.0844772	0.000172859	1	0.0150817	0.0194386	1	1	1
Holdemania_filiformis	0.11954	0.0653173	0.0886938	2.97801e-26	5.12646e-10	0.00263415	1.67702e-24	1	1	1
Odoribacter_splanchnicus	0.103342	0.0694911	0.0653824	8.92583e-27	1	6.54269e-21	1.5124e-17	1	1	1
Parabacteroides_distasonis	0.100845	0.0920686	0.10343	0.126786	1	1	1	1	1	1
Parabacteroides_merdae	0.116013	0.0897528	0.0968867	1.91081e-13	1	2.71159e-09	3.08308e-09	1	1	1
Prevotella_copri	0.0904092	0.106959	0.0654562	7.46261e-35	7.48631e-31	2.46058e-18	0.127095	1	1	1
Roseburia_hominis	0.100227	0.0918259	0.102906	0.000534611	0.0107804	0.204281	1	1	1	1
Roseburia_intestinalis	0.135719	0.178522	0.119296	1.95697e-14	1.47863e-12	0.420619	2.42615e-06	1	1	1
Roseburia_inulinivorans	0.0993108	0.201618	0.118179	7.11511e-45	8.51213e-25	0.0928812	2.32571e-39	1	1	1
Ruminococcus_bromii	0.0948028	0.0945418	0.0973643	0.425617	1	1	1	1	1	1
Ruminococcus_gnavus	0.11362	0.0961339	0.0852934	4.05814e-15	0.000101796	6.18956e-14	0.0194608	1	1	1
Ruminococcus_obeum	0.115488	0.0948376	0.106527	1.33458e-06	0.320015	0.139339	2.35451e-05	1	1	1
Ruminococcus_torques	0.116771	0.116166	0.107034	0.00802628	1	0.115269	1	1	1	1
Streptococcus_salivarius	0.104223	0.15663	0.122106	3.8786e-15	0.000865072	0.00247536	6.12707e-14	1	1	1
Veillonella_parvula	0.0926049	0.131704	0.0887325	2.85348e-11	1.72863e-09	0.814767	5.86058e-05	1	1	1
Alistipes_senegalensis	0.0809933	0.064514	0.0840043	4.81651e-11	3.62063e-07	1	1.119e-07	1	1	1
Bilophila_unclassified	0.108867	0.104184	0.102778	0.00342223	1	0.064937	0.655213	1	1	1
Burkholderiales_bacterium_1_1_47	0.0715403	0.066911	0.0566195	2.45095e-07	1	1.07273e-05	0.0032002	1	1	1
Clostridiales_bacterium_1_7_47FAA	0.0867166	0.0974704	0.107436	0.0261827	1	0.398208	1	1	1	1
Coprobacillus_unclassified	0.12573	0.0795689	0.0633771	1.9951e-34	0.000194428	1.31339e-32	4.14207e-13	1	1	1
Eggerthella_unclassified	0.088277	0.104027	0.111283	4.87644e-06	1	0.0012198	0.00118116	1	1	1
Escherichia_unclassified	0.0774595	0.0652645	0.0684193	0.164382	1	1	1	1	1	1
Granulicatella_unclassified	0.0788804	0.0611334	0.0645722	2.54362e-07	1	2.24252e-05	0.00105561	1	1	1
Lachnospiraceae_bacterium_1_1_57FAA	0.0957333	0.0975492	0.0842277	0.000597714	0.0740993	0.0236577	1	1	1	1
Lachnospiraceae_bacterium_2_1_58FAA	0.089485	0.0649458	0.0625111	6.4372e-16	1	2.14424e-13	3.29144e-08	1	1	1
Lachnospiraceae_bacterium_5_1_63FAA	0.124661	0.115925	0.111726	0.0223603	1	1	0.407199	1	1	1
Lachnospiraceae_bacterium_7_1_58FAA	0.101451	0.1061	0.109507	0.368368	1	1	1	1	1	1
Oscillibacter_unclassified	0.0912601	0.0848034	0.112989	2.52111e-14	2.67975e-12	9.87582e-07	0.790197	1	1	1
Parabacteroides_unclassified	0.114336	0.117841	0.0931217	7.82539e-10	8.07684e-07	2.49322e-06	1	1	1	1
Peptostreptococcaceae_noname_unclassified	0.19528	0.125567	0.0861035	3.1137e-44	0.001664	7.77036e-41	1.38577e-20	1	1	1
Subdoligranulum_unclassified	0.0933324	0.11479	0.117604	9.36628e-10	1	6.38321e-07	5.59486e-06	1	1	1
Veillonella_unclassified	0.142153	0.141274	0.0893965	3.41896e-24	7.09294e-17	6.24262e-18	1	1	1	1

## Sheet: CRC
	Mean Feature Importance Scores		Mann-Whitney Test P-value of Importance Scores (Corrected using Benjamini Hochberg)	Top 85 Percentile Marker (Yes: 1; No: 0)
	YoungMiddle	Elderly		YoungMiddle	Elderly
Bacteroides_nordii	0.0499086	0.0932322	2.33654e-11	0	1
Bifidobacterium_animalis	0.0229921	0.106659	6.003e-41	0	1
Clostridium_nexile	0.0424765	0.0719701	7.52323e-11	0	1
Ruminococcus_albus	0.0384545	0.0816304	1.46821e-16	0	1
Streptococcus_australis	0.0316397	0.115386	7.0564e-47	0	1
Streptococcus_gordonii	0.0527043	0.0789209	9.50849e-08	0	1
Streptococcus_mutans	0.0331931	0.0806357	2.58584e-27	0	1
Lachnospiraceae_bacterium_1_4_56FAA	0.0332615	0.089832	6.47988e-30	0	1
Streptococcus_mitis_oralis_pneumoniae	0.0604458	0.0884124	1.5026e-09	0	1
Alistipes_indistinctus	0.0559602	0.0964997	8.46105e-18	0	1
Bacteroides_faecis	0.060098	0.0740976	0.000107315	0	1
Dialister_invisus	0.0504598	0.0754218	5.0833e-09	0	1
Haemophilus_parainfluenzae	0.0442921	0.0768775	2.03708e-16	0	1
Ruminococcus_callidus	0.0486475	0.0824642	1.51691e-09	0	1
Veillonella_parvula	0.0532565	0.0907895	1.31038e-20	0	1
Lachnospiraceae_bacterium_1_1_57FAA	0.0549023	0.0921937	1.34645e-14	0	1
Paraprevotella_unclassified	0.0341026	0.0732261	1.11158e-26	0	1
Peptostreptococcaceae_noname_unclassified	0.0404787	0.069696	2.41958e-13	0	1
Subdoligranulum_sp_4_3_54A2FAA	0.0461561	0.071111	2.49529e-05	0	1
Bacteroides_eggerthii	0.124974	0.0674384	8.87778e-08	1	0
Bifidobacterium_dentium	0.130794	0.0640768	9.58579e-20	1	0
Butyricicoccus_pullicaecorum	0.0912573	0.0215764	7.47633e-34	1	0
Butyrivibrio_crossotus	0.126018	0.062627	2.90438e-13	1	0
Clostridium_clostridioforme	0.0853451	0.0589274	6.02065e-06	1	0
Clostridium_hylemonae	0.0660402	0.0138887	8.36213e-37	1	0
Clostridium_innocuum	0.102681	0.0499306	2.03051e-12	1	0
Clostridium_ramosum	0.0939995	0.0598464	3.37898e-08	1	0
Desulfovibrio_desulfuricans	0.132387	0.0683742	2.84477e-09	1	0
Desulfovibrio_piger	0.0931681	0.0673648	7.13978e-05	1	0
Lactobacillus_gasseri	0.106283	0.0346909	2.01874e-29	1	0
Lactococcus_lactis	0.104309	0.0677755	0.000288347	1	0
Coprobacillus_unclassified	0.149621	0.0693609	1.68675e-18	1	0
Coprobacter_fastidiosus	0.109535	0.0683745	4.40618e-05	1	0
Scardovia_wiggsiae	0.0819452	0.0349725	1.406e-21	1	0
Streptococcus_tigurinus	0.0660606	0.0445599	0.000116242	1	0
Actinomyces_graevenitzii	0.0724088	0.0610234	1	1	0
Atopobium_parvulum	0.0836068	0.0647052	0.612255	1	0
Parasutterella_excrementihominis	0.0623	0.0596837	1	1	0
Actinomyces_odontolyticus	0.327175	0.139738	8.46488e-34	1	1
Anaerostipes_hadrus	0.0854393	0.166604	3.80401e-29	1	1
Bacteroides_fragilis	0.292308	0.133555	8.2833e-27	1	1
Barnesiella_intestinihominis	0.143262	0.102891	1.20504e-05	1	1
Bifidobacterium_catenulatum	0.0658453	0.133682	5.58156e-13	1	1
Bifidobacterium_longum	0.123004	0.153796	1.58632e-05	1	1
Bilophila_wadsworthia	0.252209	0.112643	2.4542e-29	1	1
Clostridium_asparagiforme	0.263936	0.0932452	5.55753e-34	1	1
Clostridium_bartlettii	0.0733364	0.106601	1.30866e-09	1	1
Clostridium_bolteae	0.214179	0.122293	1.04053e-13	1	1
Clostridium_citroniae	0.190708	0.0825995	5.07594e-24	1	1
Clostridium_hathewayi	0.322401	0.222973	3.40455e-09	1	1
Clostridium_leptum	0.0810847	0.110628	1.49753e-07	1	1
Eggerthella_lenta	0.200591	0.0974859	1.72585e-18	1	1
Escherichia_coli	0.310848	0.156197	3.16764e-24	1	1
Eubacterium_biforme	0.218588	0.0710335	6.98565e-38	1	1
Eubacterium_eligens	0.0684551	0.122117	4.44003e-22	1	1
Fusobacterium_nucleatum	0.310365	0.213825	3.37677e-09	1	1
Gordonibacter_pamelaeae	0.066652	0.116726	2.91546e-12	1	1
Holdemania_filiformis	0.14617	0.0886158	1.87656e-08	1	1
Parvimonas_micra	0.239475	0.0881186	1.06077e-36	1	1
Peptostreptococcus_stomatis	0.391581	0.145359	4.38449e-46	1	1
Porphyromonas_asaccharolytica	0.190062	0.13644	5.1478e-08	1	1
Pseudoflavonifractor_capillosus	0.385004	0.112364	3.45943e-49	1	1
Roseburia_intestinalis	0.0635408	0.135058	2.35924e-31	1	1
Ruminococcus_obeum	0.199524	0.129868	5.42427e-05	1	1
Solobacterium_moorei	0.310204	0.128374	1.70408e-41	1	1
Streptococcus_anginosus	0.470197	0.0949632	5.33588e-56	1	1
Streptococcus_infantis	0.0857304	0.162628	2.42859e-11	1	1
Streptococcus_vestibularis	0.128461	0.0773229	1.0287e-10	1	1
Subdoligranulum_variabile	0.254304	0.0875468	5.92711e-44	1	1
Adlercreutzia_equolifaciens	0.0961048	0.149944	1.8932e-09	1	1
Alistipes_senegalensis	0.126552	0.0885342	1.24984e-05	1	1
Erysipelotrichaceae_bacterium_21_3	0.156436	0.0935312	5.58156e-13	1	1
Erysipelotrichaceae_bacterium_2_2_44A	0.157698	0.0858101	2.36378e-18	1	1
Granulicatella_unclassified	0.0748049	0.122702	1.38599e-09	1	1
Lachnospiraceae_bacterium_3_1_57FAA_CT1	0.230441	0.120442	1.24181e-17	1	1
Lachnospiraceae_bacterium_5_1_63FAA	0.100797	0.167619	5.85943e-17	1	1
Olsenella_unclassified	0.198175	0.0940088	1.42321e-24	1	1
Parvimonas_unclassified	0.44625	0.162238	6.43561e-49	1	1
Ruminococcaceae_bacterium_D16	0.207221	0.131162	2.46606e-08	1	1
Ruminococcus_sp_5_1_39BFAA	0.111878	0.220355	2.12486e-24	1	1
Akkermansia_muciniphila	0.0845972	0.11446	5.22582e-07	1	1
Alistipes_onderdonkii	0.075948	0.15874	1.68781e-26	1	1
Alistipes_putredinis	0.0822043	0.143835	1.62174e-19	1	1
Alistipes_shahii	0.088663	0.110914	0.000457167	1	1
Bacteroides_caccae	0.0690132	0.128935	3.96119e-21	1	1
Bacteroides_dorei	0.0892919	0.138794	9.60598e-15	1	1
Bacteroides_massiliensis	0.0795235	0.103651	0.00453568	1	1
Bacteroides_thetaiotaomicron	0.0735761	0.127085	1.89794e-19	1	1
Bacteroides_vulgatus	0.0785342	0.117095	1.15179e-17	1	1
Bacteroides_xylanisolvens	0.0724218	0.111829	1.1061e-12	1	1
Bifidobacterium_adolescentis	0.0650009	0.139814	3.73095e-36	1	1
Collinsella_aerofaciens	0.0856463	0.112228	2.05767e-10	1	1
Coprococcus_catus	0.09314	0.110848	0.00311727	1	1
Coprococcus_comes	0.0798536	0.136519	3.71252e-16	1	1
Dorea_formicigenerans	0.106278	0.132694	0.00169798	1	1
Eubacterium_hallii	0.10756	0.17542	3.78437e-13	1	1
Eubacterium_ramulus	0.0646738	0.111053	1.21517e-17	1	1
Eubacterium_rectale	0.0787249	0.187082	2.0509e-39	1	1
Eubacterium_ventriosum	0.065264	0.126883	1.0372e-26	1	1
Parabacteroides_distasonis	0.0776678	0.145734	1.01097e-18	1	1
Parabacteroides_merdae	0.0715452	0.169837	1.44693e-37	1	1
Ruminococcus_lactaris	0.0633156	0.0913989	2.07114e-13	1	1
Ruminococcus_torques	0.122511	0.213228	2.31342e-17	1	1
Streptococcus_thermophilus	0.0651159	0.164219	9.41396e-32	1	1
Bacteroidales_bacterium_ph8	0.071872	0.106159	1.51208e-10	1	1
Escherichia_unclassified	0.117642	0.0800047	9.54671e-08	1	1
Lachnospiraceae_bacterium_3_1_46FAA	0.0732873	0.107825	9.27672e-09	1	1
Lachnospiraceae_bacterium_7_1_58FAA	0.117784	0.14207	0.000491299	1	1
Oscillibacter_unclassified	0.0977733	0.143564	4.54337e-16	1	1
Veillonella_unclassified	0.0762049	0.109585	4.29242e-13	1	1
Faecalibacterium_prausnitzii	0.114245	0.133358	0.0103889	1	1
Gemella_sanguinis	0.0785772	0.0936483	0.0704736	1	1
Clostridiales_bacterium_1_7_47FAA	0.0803223	0.0704864	0.0229478	1	1
Lachnospiraceae_bacterium_2_1_58FAA	0.109496	0.0843609	0.0189963	1	1
Alistipes_finegoldii	0.0863428	0.114521	0.106301	1	1
Anaerotruncus_colihominis	0.113042	0.0961819	0.536955	1	1
Bacteroides_cellulosilyticus	0.0787735	0.0888557	0.214236	1	1
Bacteroides_ovatus	0.121862	0.122736	0.395507	1	1
Bacteroides_stercoris	0.112555	0.14503	0.0167166	1	1
Bacteroides_uniformis	0.140481	0.154306	0.160412	1	1
Clostridium_symbiosum	0.135987	0.149949	1	1	1
Dorea_longicatena	0.121396	0.118245	1	1	1
Eubacterium_siraeum	0.116613	0.126566	0.214236	1	1
Flavonifractor_plautii	0.111857	0.131162	1	1	1
Gemella_morbillorum	0.146492	0.124065	0.597599	1	1
Granulicatella_adiacens	0.088654	0.0806898	1	1	1
Methanobrevibacter_smithii	0.10987	0.122172	0.300641	1	1
Odoribacter_splanchnicus	0.0829767	0.0825078	1	1	1
Prevotella_copri	0.173317	0.129633	0.0297504	1	1
Roseburia_hominis	0.0842783	0.103898	0.300641	1	1
Roseburia_inulinivorans	0.128672	0.120994	1	1	1
Rothia_mucilaginosa	0.126138	0.106737	1	1	1
Ruminococcus_bromii	0.110383	0.127413	0.0632139	1	1
Ruminococcus_gnavus	0.100279	0.105886	0.514487	1	1
Streptococcus_parasanguinis	0.129712	0.138676	0.429845	1	1
Streptococcus_salivarius	0.170851	0.195172	0.300618	1	1
Streptococcus_sanguinis	0.192575	0.180234	1	1	1
Veillonella_atypica	0.0838249	0.0820734	1	1	1
Anaerotruncus_unclassified	0.117803	0.117902	1	1	1
Bilophila_unclassified	0.184823	0.157173	0.429845	1	1
Eggerthella_unclassified	0.138584	0.114924	1	1	1
Erysipelotrichaceae_bacterium_6_1_45	0.0661864	0.0700409	0.348852	1	1
Methanobrevibacter_unclassified	0.071184	0.0706214	1	1	1
Mitsuokella_unclassified	0.0850994	0.0786864	1	1	1
Subdoligranulum_unclassified	0.103319	0.119986	0.0982592	1	1

## Sheet: Polyps
	Mean Feature Importance Scores		Mann-Whitney Test P-value of Importance Scores (Corrected using Benjamini Hochberg)	Top 85 Percentile Marker (Yes: 1; No: 0)
	YoungMiddle	Elderly		YoungMiddle	Elderly
Actinomyces_graevenitzii	0.0203452	0.049005	2.47407e-23	0	1
Bifidobacterium_catenulatum	0.0314558	0.0492658	5.79902e-05	0	1
Clostridium_bolteae	0.0417967	0.048999	0.777869	0	1
Clostridium_ramosum	0.0118245	0.0518802	2.19637e-26	0	1
Eubacterium_biforme	0.0398335	0.0519421	1	0	1
Gordonibacter_pamelaeae	0.0391149	0.0659857	8.94802e-09	0	1
Holdemania_filiformis	0.0384666	0.0573806	3.25458e-06	0	1
Methanobrevibacter_smithii	0.0446185	0.0516613	1	0	1
Pseudoflavonifractor_capillosus	0.0404006	0.0515541	1	0	1
Rothia_mucilaginosa	0.0386888	0.0671768	8.27405e-12	0	1
Solobacterium_moorei	0.0388751	0.0483312	0.0513672	0	1
Streptococcus_anginosus	0.0286923	0.0516157	5.49008e-12	0	1
Streptococcus_gordonii	0.0368629	0.0542173	1.64449e-05	0	1
Streptococcus_infantis	0.0397301	0.0694411	4.04124e-09	0	1
Streptococcus_sanguinis	0.0456621	0.0753329	1.05934e-15	0	1
Streptococcus_vestibularis	0.0452559	0.0501001	1	0	1
Coprobacillus_unclassified	0.0283029	0.06012	4.98544e-16	0	1
Granulicatella_unclassified	0.0457641	0.0596363	0.00150968	0	1
Holdemania_unclassified	0.0204107	0.0486855	8.08244e-23	0	1
Lachnospiraceae_bacterium_2_1_58FAA	0.0396165	0.0671641	0.00043353	0	1
Lachnospiraceae_bacterium_3_1_46FAA	0.047406	0.0857693	5.28877e-18	0	1
Mitsuokella_unclassified	0.0278549	0.0636326	4.97985e-28	0	1
Olsenella_unclassified	0.0426483	0.0521504	0.0723805	0	1
Ruminococcaceae_bacterium_D16	0.0474857	0.0520869	1	0	1
Bacteroides_clarus	0.0742429	0.0335104	6.94571e-24	1	0
Bacteroides_eggerthii	0.0566817	0.037333	6.72296e-07	1	0
Bacteroides_faecis	0.0669315	0.0363757	8.12636e-16	1	0
Bifidobacterium_pseudocatenulatum	0.0546637	0.0295332	2.81872e-11	1	0
Clostridium_asparagiforme	0.0528649	0.0384679	0.00240196	1	0
Clostridium_hathewayi	0.0644223	0.0423647	1.87956e-05	1	0
Clostridium_innocuum	0.0498396	0.0282471	1.3593e-05	1	0
Odoribacter_splanchnicus	0.067606	0.0350831	1.27464e-20	1	0
Phascolarctobacterium_succinatutens	0.0526263	0.0296457	3.738e-07	1	0
Alistipes_senegalensis	0.0655177	0.0464109	3.23413e-06	1	0
Burkholderiales_bacterium_1_1_47	0.0700238	0.0301629	8.99214e-19	1	0
Butyrivibrio_unclassified	0.0597613	0.0309798	4.40672e-14	1	0
Coprococcus_sp_ART55_1	0.0727217	0.0287947	1.37136e-22	1	0
Lachnospiraceae_bacterium_3_1_57FAA_CT1	0.0555165	0.0413731	0.00189515	1	0
Parasutterella_excrementihominis	0.0765316	0.0330382	1.53929e-19	1	0
Peptostreptococcaceae_noname_unclassified	0.0639399	0.0472398	0.00189515	1	0
Roseburia_unclassified	0.0748875	0.0204667	1.91801e-29	1	0
Sutterella_wadsworthensis	0.0617114	0.0258168	4.71505e-22	1	0
Actinomyces_odontolyticus	0.057006	0.0718496	0.0202015	1	1
Akkermansia_muciniphila	0.0735783	0.0669783	0.913638	1	1
Alistipes_finegoldii	0.0660605	0.0531329	0.159401	1	1
Alistipes_indistinctus	0.0596125	0.053246	0.913638	1	1
Alistipes_onderdonkii	0.0640845	0.0707316	1	1	1
Alistipes_putredinis	0.0718655	0.0609467	0.834625	1	1
Alistipes_shahii	0.10181	0.0611353	3.59587e-14	1	1
Anaerostipes_hadrus	0.0771163	0.120202	1.6958e-06	1	1
Bacteroides_caccae	0.054416	0.0553401	1	1	1
Bacteroides_cellulosilyticus	0.0947227	0.0507652	4.19505e-17	1	1
Bacteroides_dorei	0.206567	0.0924412	2.95601e-32	1	1
Bacteroides_fragilis	0.112519	0.0532713	2.19938e-19	1	1
Bacteroides_massiliensis	0.0546854	0.057723	1	1	1
Bacteroides_ovatus	0.115833	0.0695702	4.28549e-17	1	1
Bacteroides_stercoris	0.0713264	0.0726751	1	1	1
Bacteroides_thetaiotaomicron	0.109823	0.0664754	1.33235e-15	1	1
Bacteroides_uniformis	0.0987783	0.0713887	9.04447e-09	1	1
Bacteroides_vulgatus	0.074393	0.0738513	1	1	1
Bacteroides_xylanisolvens	0.10814	0.0685272	8.93763e-16	1	1
Barnesiella_intestinihominis	0.0576212	0.0593494	1	1	1
Bifidobacterium_adolescentis	0.0713918	0.0768556	1	1	1
Bifidobacterium_longum	0.0653695	0.091842	1.77722e-06	1	1
Bilophila_wadsworthia	0.0930373	0.0493756	2.56707e-12	1	1
Clostridium_bartlettii	0.0520506	0.0582884	1	1	1
Clostridium_leptum	0.0605505	0.075213	0.00457232	1	1
Collinsella_aerofaciens	0.0773031	0.0628248	3.4049e-06	1	1
Coprococcus_catus	0.0616662	0.077845	0.476423	1	1
Coprococcus_comes	0.0735932	0.0662811	1	1	1
Dorea_formicigenerans	0.066352	0.0703687	1	1	1
Dorea_longicatena	0.0835657	0.0714387	0.913638	1	1
Eggerthella_lenta	0.10187	0.0585289	1.36389e-11	1	1
Escherichia_coli	0.113043	0.0799229	6.27197e-05	1	1
Eubacterium_eligens	0.085927	0.0785999	0.600364	1	1
Eubacterium_hallii	0.0946596	0.0666025	5.79902e-05	1	1
Eubacterium_ramulus	0.0589071	0.0904322	9.65564e-11	1	1
Eubacterium_rectale	0.0647816	0.0784892	0.0277944	1	1
Eubacterium_siraeum	0.0581126	0.0789748	0.0294402	1	1
Eubacterium_ventriosum	0.0804456	0.0662263	0.157692	1	1
Faecalibacterium_prausnitzii	0.0828266	0.0679528	0.0770612	1	1
Flavonifractor_plautii	0.0515013	0.0567337	1	1	1
Lactococcus_lactis	0.0578221	0.0659351	1	1	1
Parabacteroides_distasonis	0.0542533	0.0613238	1	1	1
Parabacteroides_merdae	0.0560595	0.0558717	1	1	1
Roseburia_hominis	0.0742432	0.0794745	1	1	1
Roseburia_intestinalis	0.0671989	0.0833266	0.0011265	1	1
Roseburia_inulinivorans	0.0625209	0.073862	0.409995	1	1
Ruminococcus_bromii	0.102263	0.0724225	7.05962e-07	1	1
Ruminococcus_callidus	0.0624994	0.0485447	2.26744e-05	1	1
Ruminococcus_gnavus	0.0915569	0.0773308	0.23731	1	1
Ruminococcus_lactaris	0.0691547	0.0583778	0.0132539	1	1
Ruminococcus_obeum	0.0591701	0.0692536	1	1	1
Ruminococcus_torques	0.0792008	0.0801974	1	1	1
Streptococcus_australis	0.0499644	0.0643424	0.00504013	1	1
Streptococcus_parasanguinis	0.0664436	0.0746603	1	1	1
Streptococcus_salivarius	0.0608213	0.0689463	1	1	1
Streptococcus_thermophilus	0.109257	0.076928	1.18676e-05	1	1
Subdoligranulum_variabile	0.0887898	0.0769373	0.39453	1	1
Veillonella_parvula	0.0502128	0.0576999	1	1	1
Adlercreutzia_equolifaciens	0.0899899	0.0753148	0.008121	1	1
Anaerotruncus_unclassified	0.0544659	0.0540059	1	1	1
Bacteroidales_bacterium_ph8	0.122231	0.0667276	1.54746e-17	1	1
Bilophila_unclassified	0.0776679	0.0583658	6.04051e-05	1	1
Eggerthella_unclassified	0.0978298	0.0816626	0.39453	1	1
Erysipelotrichaceae_bacterium_21_3	0.0628469	0.0672054	1	1	1
Erysipelotrichaceae_bacterium_2_2_44A	0.0754327	0.0602925	0.000176903	1	1
Escherichia_unclassified	0.079099	0.0572504	0.0934076	1	1
Lachnospiraceae_bacterium_1_1_57FAA	0.0522516	0.0605049	0.0910902	1	1
Lachnospiraceae_bacterium_5_1_63FAA	0.073347	0.0879572	0.187725	1	1
Lachnospiraceae_bacterium_7_1_58FAA	0.0629427	0.0665212	1	1	1
Oscillibacter_unclassified	0.059496	0.0720257	0.834625	1	1
Ruminococcus_sp_5_1_39BFAA	0.0539526	0.0819244	9.82846e-12	1	1
Streptococcus_mitis_oralis_pneumoniae	0.0705599	0.060011	0.307303	1	1
Subdoligranulum_unclassified	0.0669121	0.0764211	1	1	1
Veillonella_unclassified	0.0538306	0.077705	2.77926e-11	1	1
