# Supplementary material for: Adjusting for age improves identification of gut microbiome alterations in multiple diseases
Source: eLife. 2020 Mar 11;9:e50240. doi: 10.7554/eLife.50240 (PMC7065848; doi:10.7554/eLife.50240)
Supplement: Figure 3—source data 2. — Model one corresponds to Log(Species)~Country + Disease + Age group. Model two corresponds to Log(Species)~Disease:Age group. The AIC values for the two models along with the one sided Log Likelihood Ratio test P-value. [file elife-50240-fig3-data2.xlsx]

## Sheet: Legend
Figure 3 - source data 2: Linear model based validation results to deconvolute the effect of ageing on age-group specific disease markers for (A) IBD (B) Cirrhosis (C) T2D (D) CRC and (E) Polyps. Model 1 corresponds to Log(Species) ~ Country + Disease + Age group. Model 2 corresponds to Log(Species) ~ Disease:Age group. The AIC values for the two models along with the one sided Log Likelihood Rat…

## Sheet: IBD
	Model-based validations
	AIC_Model2	AIC_Model1	Log-ratio likelihood test	Validated
Akkermansia_muciniphila	3064.04	3069.58	0.00423518	Yes
Anaerostipes_hadrus	2691.87	2699.34	0.00161406	Yes
Anaerotruncus_colihominis	2727.47	2738.85	0.000229238	Yes
Bacteroides_fragilis	3134.45	3136.24	0.0275729	Yes
Bacteroides_ovatus	2670.92	2676.55	0.00406524	Yes
Barnesiella_intestinihominis	3044.81	3052.53	0.00142486	Yes
Bifidobacterium_adolescentis	3000.2	3002.9	0.0174948	Yes
Bifidobacterium_animalis	2659.59	2672.21	0.000123331	Yes
Bifidobacterium_longum	2770.16	2786.95	1.53098e-05	Yes
Bifidobacterium_pseudocatenulatum	2894.68	2896.49	0.0273766	Yes
Bilophila_wadsworthia	2684.5	2686.88	0.0206127	Yes
Blautia_producta	2583.85	2617.47	3.38487e-09	Yes
Clostridium_asparagiforme	2768.43	2795.39	9.45334e-08	Yes
Clostridium_bartlettii	2879.24	2885.97	0.00233339	Yes
Clostridium_bolteae	2855.26	2879.15	4.39544e-07	Yes
Clostridium_clostridioforme	2824.28	2859.09	1.87045e-09	Yes
Clostridium_hathewayi	2764.19	2789.46	2.19993e-07	Yes
Clostridium_nexile	2772.98	2817.86	1.21827e-11	Yes
Clostridium_ramosum	2714.29	2720.9	0.00248833	Yes
Clostridium_scindens	2484.32	2517.77	3.67733e-09	Yes
Clostridium_symbiosum	2830.69	2866.24	1.28812e-09	Yes
Coprococcus_comes	2835.31	2838.3	0.0151434	Yes
Desulfovibrio_desulfuricans	2442.05	2445.31	0.013271	Yes
Eggerthella_lenta	2703.7	2735.48	8.51249e-09	Yes
Escherichia_coli	2915.68	2921.47	0.0037542	Yes
Eubacterium_biforme	2931.44	2937.41	0.00341926	Yes
Eubacterium_hallii	2737.86	2742.13	0.0080089	Yes
Flavonifractor_plautii	2670.02	2679.36	0.000633264	Yes
Haemophilus_parainfluenzae	2870.55	2881.91	0.000230721	Yes
Holdemania_filiformis	2773.69	2780.75	0.0019814	Yes
Lactococcus_lactis	2764.9	2778.46	7.68244e-05	Yes
Prevotella_copri	3119.82	3135.16	3.16048e-05	Yes
Pseudoflavonifractor_capillosus	2428.59	2439.01	0.000370443	Yes
Rothia_mucilaginosa	2434.33	2485.69	4.78062e-13	Yes
Ruminococcus_albus	2394.02	2396.02	0.0249346	Yes
Ruminococcus_gnavus	2896.9	2911.98	3.59804e-05	Yes
Ruminococcus_obeum	2092.75	2096.84	0.00878872	Yes
Streptococcus_australis	2667.19	2689.78	8.39271e-07	Yes
Streptococcus_salivarius	2474.89	2502.23	7.82918e-08	Yes
Streptococcus_sanguinis	2567.67	2611.14	2.46123e-11	Yes
Streptococcus_thermophilus	2893.56	2898.89	0.00471414	Yes
Streptococcus_vestibularis	2698.53	2700.91	0.020534	Yes
Subdoligranulum_variabile	2284.69	2293.83	0.000700065	Yes
Veillonella_atypica	2693.99	2713.97	3.0972e-06	Yes
Veillonella_parvula	2783.23	2784.31	0.0396016	Yes
Adlercreutzia_equolifaciens	2816.01	2826.95	0.000284624	Yes
Alistipes_senegalensis	2704.49	2707.21	0.0173774	Yes
Clostridiales_bacterium_1_7_47FAA	2725.93	2757.21	1.09239e-08	Yes
Coprobacillus_unclassified	2852.13	2874.66	8.65654e-07	Yes
Eggerthella_unclassified	2786.38	2807.75	1.54686e-06	Yes
Erysipelotrichaceae_bacterium_21_3	2622.81	2638.49	2.67352e-05	Yes
Erysipelotrichaceae_bacterium_2_2_44A	2594.59	2612.15	1.04097e-05	Yes
Erysipelotrichaceae_bacterium_6_1_45	2634.34	2637.21	0.0161519	Yes
Escherichia_unclassified	2846.25	2855.52	0.000655313	Yes
Lachnospiraceae_bacterium_1_1_57FAA	3027.22	3028.26	0.04021	Yes
Lachnospiraceae_bacterium_1_4_56FAA	2869.37	2875.66	0.00290826	Yes
Lachnospiraceae_bacterium_2_1_58FAA	2847.43	2853.18	0.00381775	Yes
Lachnospiraceae_bacterium_3_1_46FAA	2692.54	2696.96	0.00740598	Yes
Lachnospiraceae_bacterium_3_1_57FAA_CT1	2735.53	2741.55	0.00332591	Yes
Lachnospiraceae_bacterium_5_1_57FAA	2676.7	2702.64	1.57857e-07	Yes
Lachnospiraceae_bacterium_5_1_63FAA	2558.5	2574.63	2.12391e-05	Yes
Lachnospiraceae_bacterium_6_1_63FAA	2370.88	2411.76	8.96546e-11	Yes
Lachnospiraceae_bacterium_9_1_43BFAA	2492.3	2527.37	1.64221e-09	Yes
Parasutterella_excrementihominis	2844.12	2845.64	0.0317042	Yes
Ruminococcus_sp_5_1_39BFAA	3136.12	3149.72	7.53969e-05	Yes
Streptococcus_mitis_oralis_pneumoniae	2441.59	2448.87	0.00177285	Yes
Veillonella_unclassified	2687.08	2695.15	0.00119821	Yes
Bacteroides_clarus	2677.18	2682.2	0.00550646	Yes
Bacteroides_coprocola	2760.83	2763.42	0.0184761	Yes
Bacteroides_finegoldii	2984.03	2991.08	0.00198974	Yes
Bacteroides_intestinalis	2660.44	2669.89	0.000600638	Yes
Bacteroides_plebeius	2792.41	2794.77	0.0207611	Yes
Butyrivibrio_crossotus	2505.31	2544.76	1.83581e-10	Yes
Enterococcus_faecium	2527.25	2528.16	0.0430019	Yes
Methanobrevibacter_smithii	2956.06	2959.83	0.0102453	Yes
Oxalobacter_formigenes	2442.05	2450.75	0.000872313	Yes
Parabacteroides_goldsteinii	2628.3	2644.12	2.47966e-05	Yes
Paraprevotella_clara	2856.59	2857.33	0.0468661	Yes
Paraprevotella_xylaniphila	2549.23	2557.56	0.00105535	Yes
Phascolarctobacterium_succinatutens	2802.39	2819.35	1.40504e-05	Yes
Acidaminococcus_unclassified	2856.21	2863.84	0.00148897	Yes
Coprobacter_fastidiosus	2518.59	2536.88	7.23565e-06	Yes
Granulicatella_unclassified	2294.68	2305.07	0.000375866	Yes
Methanobrevibacter_unclassified	2378.09	2396.95	5.41977e-06	Yes
Mitsuokella_unclassified	2529.3	2534.41	0.00524133	Yes
Olsenella_unclassified	2100	2105.43	0.004474	Yes
Paraprevotella_unclassified	2933.16	2937.7	0.00698373	Yes
Sutterella_wadsworthensis	3065.28	3070.87	0.004142	Yes
Actinomyces_odontolyticus	1974.72	2036.61	2.4635e-15	Yes
Atopobium_parvulum	1851.47	1905.64	1.16956e-13	Yes
Bacteroides_nordii	2422.44	2429.64	0.00185138	Yes
Bacteroides_pectinophilus	2079.34	2142.62	1.22489e-15	Yes
Bacteroides_salyersiae	2727.28	2735.2	0.00128837	Yes
Butyricimonas_synergistica	2117.91	2129.02	0.000261964	Yes
Clostridium_citroniae	2503.88	2526.28	9.26453e-07	Yes
Clostridium_innocuum	2254.59	2273.1	6.47035e-06	Yes
Collinsella_intestinalis	2362.35	2389.32	9.40458e-08	Yes
Coprococcus_eutactus	2001.02	2038.23	5.63264e-10	Yes
Gemella_sanguinis	2025.49	2058.64	4.28466e-09	Yes
Granulicatella_adiacens	1890.12	1933.96	2.0511e-11	Yes
Parabacteroides_johnsonii	2684.05	2691.35	0.00176076	Yes
Porphyromonas_asaccharolytica	2168.95	2186.15	1.24768e-05	Yes
Ruminococcus_champanellensis	2107.43	2158.73	4.91859e-13	Yes
Ruminococcus_flavefaciens	2186.28	2196.86	0.000340649	Yes
Solobacterium_moorei	2260.58	2288.78	5.09293e-08	Yes
Streptococcus_anginosus	2137.78	2163.72	1.57676e-07	Yes
Streptococcus_gordonii	2122.57	2145.83	6.01347e-07	Yes
Streptococcus_infantis	2352.83	2371.86	4.98667e-06	Yes
Veillonella_dispar	2497.87	2519.99	1.06251e-06	Yes
Alistipes_finegoldii	2889.5	2886.8	0.260555	No
Alistipes_indistinctus	2879.11	2877.41	0.158531	No
Alistipes_putredinis	3039.33	3036.41	0.292714	No
Alistipes_shahii	2923.08	2920.26	0.276724	No
Bacteroides_caccae	3075.05	3071.33	0.43455	No
Bacteroides_cellulosilyticus	3043.73	3043.43	0.0784715	No
Bacteroides_dorei	2851.88	2848.22	0.421902	No
Bacteroides_faecis	2937.13	2934.62	0.237365	No
Bacteroides_massiliensis	3093.54	3092.12	0.137752	No
Bacteroides_stercoris	3151.29	3150.46	0.102379	No
Bacteroides_thetaiotaomicron	2968.48	2966.13	0.218654	No
Bacteroides_uniformis	2745.43	2741.52	0.478445	No
Bacteroides_vulgatus	2664.07	2662.63	0.13903	No
Bacteroides_xylanisolvens	2850.1	2846.57	0.396017	No
Bifidobacterium_bifidum	3071.1	3067.53	0.403355	No
Blautia_hydrogenotrophica	2858.55	2858.91	0.056478	No
Clostridium_leptum	2716.62	2713.21	0.373549	No
Collinsella_aerofaciens	3014.97	3011.54	0.377411	No
Coprococcus_catus	2910.16	2906.18	0.494477	No
Dialister_invisus	3185.37	3185.86	0.0530384	No
Dorea_formicigenerans	2743.47	2740.86	0.250291	No
Dorea_longicatena	2766.46	2765.59	0.104676	No
Eubacterium_eligens	2875.26	2871.97	0.350903	No
Eubacterium_ramulus	2851.21	2849.65	0.147914	No
Eubacterium_rectale	2376.74	2372.77	0.492007	No
Eubacterium_siraeum	3023.38	3020.54	0.279784	No
Eubacterium_ventriosum	2917.39	2915.83	0.147779	No
Faecalibacterium_prausnitzii	2269.96	2269.42	0.0887784	No
Gordonibacter_pamelaeae	2815.05	2815.23	0.0616804	No
Odoribacter_splanchnicus	2987.34	2986.47	0.104802	No
Parabacteroides_distasonis	2970.97	2967.34	0.416898	No
Parabacteroides_merdae	3122.97	3123.45	0.0534736	No
Roseburia_hominis	2763.22	2760.6	0.250597	No
Roseburia_inulinivorans	2797	2793.02	0.496363	No
Ruminococcus_bromii	3080.19	3079.45	0.097899	No
Ruminococcus_lactaris	3059.23	3057.73	0.14335	No
Ruminococcus_torques	1550.52	1550.86	0.0571113	No
Streptococcus_parasanguinis	2562.71	2562.81	0.0644888	No
Anaerotruncus_unclassified	2729.26	2728.5	0.0987388	No
Bacteroidales_bacterium_ph8	2941.56	2937.59	0.491917	No
Bilophila_unclassified	2804.65	2803.68	0.110147	No
Burkholderiales_bacterium_1_1_47	2866.69	2866.95	0.059419	No
Holdemania_unclassified	2686.54	2683.01	0.394691	No
Lachnospiraceae_bacterium_7_1_58FAA	2312.48	2308.73	0.440304	No
Lachnospiraceae_bacterium_8_1_57FAA	2835.47	2833.81	0.155446	No
Oscillibacter_unclassified	2435.81	2432.65	0.329202	No
Peptostreptococcaceae_noname_unclassified	2928.09	2926.73	0.133764	No
Roseburia_unclassified	2849.76	2847.73	0.186547	No
Ruminococcaceae_bacterium_D16	2708.11	2707.21	0.106601	No
Subdoligranulum_unclassified	1642.79	1639.5	0.35118	No
Bacteroides_eggerthii	2950.77	2951.1	0.057209	No
Coprococcus_sp_ART55_1	2949.78	2945.85	0.483255	No
Parabacteroides_unclassified	3121.9	3121.63	0.0774471	No

## Sheet: Cirrhosis
	Model-based validations
	AIC_Model2	AIC_Model1	Log-ratio likelihood test	Vaiidated
Bacteroides_uniformis	1215.53	1217.74	0.0224451	Yes
Bifidobacterium_longum	1888.52	1889.58	0.0397679	Yes
Clostridium_bartlettii	1793.07	1794	0.0425615	Yes
Haemophilus_haemolyticus	1366.15	1378.13	0.000169426	Yes
Streptococcus_infantis	1612.6	1615.13	0.0191595	Yes
Streptococcus_vestibularis	1693.58	1695.5	0.0258966	Yes
Actinobacillus_unclassified	1619.42	1625.91	0.00264673	Yes
Aggregatibacter_segnis	1465.56	1476.46	0.000291777	Yes
Campylobacter_concisus	1361.85	1364.02	0.0227899	Yes
Lachnospiraceae_bacterium_1_1_57FAA	1895.95	1897.02	0.0395378	Yes
Streptococcus_mitis_oralis_pneumoniae	1649.76	1650.74	0.0414977	Yes
Flavonifractor_plautii	1759.18	1765.99	0.00224237	Yes
Prevotella_buccae	1492.9	1497.81	0.00582383	Yes
Bacteroides_oleiciplenus	1596.19	1597.2	0.0409179	Yes
Butyricimonas_synergistica	1645.45	1646.4	0.0418834	Yes
Alistipes_finegoldii	1891.13	1887.37	0.444372	No
Alistipes_indistinctus	1820.24	1819.21	0.113104	No
Alistipes_onderdonkii	1854.4	1850.4	0.498587	No
Alistipes_putredinis	1836.3	1834.7	0.150891	No
Alistipes_shahii	1779.79	1776.11	0.426018	No
Bacteroides_caccae	1714	1711.66	0.217885	No
Bacteroides_cellulosilyticus	1814.09	1811.31	0.272325	No
Bacteroides_clarus	1822.98	1821.58	0.136229	No
Bacteroides_coprocola	1965.94	1964.78	0.12114	No
Bacteroides_dorei	1638.43	1634.61	0.458132	No
Bacteroides_eggerthii	1917.23	1913.64	0.407681	No
Bacteroides_fragilis	1737.58	1733.77	0.454653	No
Bacteroides_intestinalis	1886.06	1883.22	0.280946	No
Bacteroides_massiliensis	1836.03	1833.45	0.246303	No
Bacteroides_ovatus	1131.4	1129.57	0.168763	No
Bacteroides_plebeius	1952.93	1950.65	0.212226	No
Bifidobacterium_dentium	1619.98	1620.58	0.0500523	No
Bilophila_wadsworthia	1761.21	1757.4	0.453962	No
Clostridium_hathewayi	1767.86	1764.44	0.374187	No
Clostridium_nexile	1879.41	1876.45	0.297984	No
Clostridium_ramosum	1720.39	1719.55	0.10288	No
Clostridium_symbiosum	1809.7	1805.85	0.46329	No
Coprococcus_comes	1875.7	1872.82	0.286079	No
Desulfovibrio_desulfuricans	1731.34	1728.84	0.235635	No
Dialister_invisus	1646.77	1645.21	0.147986	No
Dorea_longicatena	1673.59	1670.17	0.373384	No
Escherichia_coli	1267.93	1264.03	0.47506	No
Eubacterium_rectale	1845.7	1842.59	0.320266	No
Fusobacterium_mortiferum	1905.31	1903.25	0.18903	No
Fusobacterium_nucleatum	1448.7	1448.64	0.0698708	No
Haemophilus_parainfluenzae	1674.54	1670.76	0.44877	No
Holdemania_filiformis	1810.67	1807.15	0.39347	No
Lactobacillus_salivarius	1723.8	1723.11	0.095217	No
Odoribacter_splanchnicus	2000.31	1996.47	0.462096	No
Parabacteroides_distasonis	1568.59	1565.08	0.392535	No
Parabacteroides_goldsteinii	1839.47	1836.41	0.311628	No
Parabacteroides_merdae	1810.04	1808.98	0.114869	No
Prevotella_copri	1790.34	1789.03	0.129974	No
Prevotella_stercorea	1923.13	1921.15	0.181588	No
Roseburia_intestinalis	1849.88	1846.3	0.404259	No
Roseburia_inulinivorans	1685.76	1683.72	0.187677	No
Ruminococcus_bromii	1843.24	1839.74	0.390583	No
Ruminococcus_lactaris	1942.42	1939.46	0.297775	No
Ruminococcus_obeum	1124.76	1124.07	0.0956832	No
Streptococcus_gordonii	1506.78	1505.73	0.114675	No
Streptococcus_parasanguinis	1707.24	1703.73	0.392782	No
Streptococcus_salivarius	1322.92	1319.3	0.412966	No
Veillonella_atypica	1720.82	1716.9	0.482039	No
Veillonella_dispar	1669.65	1665.67	0.49737	No
Veillonella_parvula	1591.85	1589.93	0.176986	No
Adlercreutzia_equolifaciens	1787.9	1784.48	0.374255	No
Anaerotruncus_unclassified	1808.87	1806.14	0.265429	No
Bilophila_unclassified	1668.32	1664.92	0.371075	No
Coprobacillus_unclassified	1801.21	1799.69	0.14514	No
Escherichia_unclassified	1906.5	1905.86	0.0929427	No
Lachnospiraceae_bacterium_2_1_58FAA	1834.12	1830.26	0.467487	No
Lachnospiraceae_bacterium_3_1_46FAA	1835.08	1833.76	0.130895	No
Lachnospiraceae_bacterium_5_1_63FAA	1590.02	1586.41	0.412019	No
Megamonas_unclassified	1970.42	1967.06	0.362745	No
Megasphaera_micronuciformis	1530.3	1528.13	0.200188	No
Oscillibacter_unclassified	1792.23	1789.79	0.228876	No
Paraprevotella_unclassified	1900.98	1898.9	0.192301	No
Peptostreptococcaceae_noname_unclassified	1852.13	1849.89	0.207336	No
Subdoligranulum_unclassified	1178.89	1177.22	0.155357	No
Veillonella_unclassified	1494.76	1492.02	0.265561	No
Akkermansia_muciniphila	1905.66	1906	0.0571152	No
Bifidobacterium_pseudocatenulatum	1925.58	1925.66	0.0650549	No
Clostridium_citroniae	1761.3	1759.66	0.153693	No
Clostridium_perfringens	1667.96	1664.75	0.336439	No
Dorea_formicigenerans	1720.89	1720.61	0.0778614	No
Eubacterium_ramulus	1775.34	1772.65	0.259395	No
Eubacterium_ventriosum	1874.57	1874.75	0.0617295	No
Lactobacillus_mucosae	1634.89	1632.01	0.285503	No
Clostridiales_bacterium_1_7_47FAA	1769.35	1765.65	0.430779	No
Eggerthella_unclassified	1762.18	1758.34	0.462518	No
Lachnospiraceae_bacterium_7_1_58FAA	1727.88	1727.27	0.091541	No
Parabacteroides_unclassified	2019.1	2015.51	0.40757	No
Ruminococcus_sp_5_1_39BFAA	2009.69	2007.59	0.193453	No
Clostridium_asparagiforme	1811.79	1809.09	0.260732	No
Collinsella_aerofaciens	1903.26	1903.24	0.0682038	No
Ruminococcus_callidus	1910.8	1907.39	0.371678	No
Streptococcus_australis	1752.74	1751.62	0.118326	No
Streptococcus_mutans	1375.54	1372.66	0.285642	No
Alistipes_senegalensis	1753.29	1751	0.213007	No

## Sheet: T2D
	Model-based validations
	AIC_Model2	AIC_Model1	Log-ratio likelihood test	Validated
Alistipes_indistinctus	3688.94	3697.56	0.000454019	Yes
Alistipes_shahii	3535.33	3535.96	0.0247065	Yes
Anaerostipes_hadrus	3179.48	3178.7	0.0499334	Yes
Bacteroides_caccae	3675.78	3677.2	0.0166892	Yes
Bacteroides_cellulosilyticus	3716.77	3721.77	0.00277351	Yes
Bacteroides_clarus	3633.31	3633.46	0.0314069	Yes
Bacteroides_coprocola	3765.61	3769.85	0.00405835	Yes
Bacteroides_intestinalis	3764.92	3765.08	0.0312552	Yes
Bacteroides_massiliensis	3857.71	3857.95	0.0300717	Yes
Bacteroides_salyersiae	3737.77	3738.88	0.0194746	Yes
Barnesiella_intestinihominis	3768.84	3768.92	0.0324141	Yes
Bifidobacterium_pseudocatenulatum	3802.52	3803.16	0.0246838	Yes
Butyricimonas_synergistica	3096.88	3098.46	0.0152856	Yes
Desulfovibrio_desulfuricans	3470.09	3470.28	0.0308382	Yes
Eubacterium_hallii	3080.34	3080.09	0.038387	Yes
Eubacterium_rectale	3512.48	3516.23	0.00519012	Yes
Faecalibacterium_prausnitzii	2440.1	2441.09	0.0206162	Yes
Granulicatella_adiacens	2871.76	2874.91	0.00700017	Yes
Haemophilus_parainfluenzae	3632.61	3632.08	0.0440956	Yes
Odoribacter_splanchnicus	3817.37	3816.79	0.0452006	Yes
Roseburia_intestinalis	3719.44	3720.8	0.0171727	Yes
Roseburia_inulinivorans	3412.73	3415.55	0.00824301	Yes
Ruminococcus_lactaris	3905.35	3905.08	0.0386404	Yes
Ruminococcus_obeum	1711.41	1712.22	0.0225691	Yes
Streptococcus_salivarius	2906.56	2906.7	0.0315502	Yes
Alistipes_senegalensis	3497.66	3498.27	0.0250088	Yes
Lachnospiraceae_bacterium_1_1_57FAA	3797.46	3797.5	0.0331296	Yes
Peptostreptococcaceae_noname_unclassified	3694.01	3703.25	0.000334517	Yes
Prevotella_stercorea	3355.69	3368.83	4.75579e-05	Yes
Streptococcus_sanguinis	3170.71	3172.2	0.0160746	Yes
Veillonella_atypica	3489.43	3492.86	0.00608711	Yes
Veillonella_dispar	3346.55	3348.58	0.0122802	Yes
Megasphaera_unclassified	3598.79	3602.93	0.00428275	Yes
Eubacterium_siraeum	3691.38	3691.03	0.0403773	Yes
Pseudoflavonifractor_capillosus	2981.06	2981.87	0.0225787	Yes
Bacteroidales_bacterium_ph8	3757.35	3757.73	0.0280358	Yes
Butyrivibrio_unclassified	3140.05	3142.71	0.00897128	Yes
Alistipes_finegoldii	3686.87	3683.39	0.192731	No
Alistipes_onderdonkii	3614.41	3612.09	0.107615	No
Alistipes_putredinis	3649.43	3647.25	0.100684	No
Bacteroides_dorei	3363.54	3361.1	0.114848	No
Bacteroides_eggerthii	3869.84	3865.86	0.247861	No
Bacteroides_faecis	3473.87	3471.58	0.106627	No
Bacteroides_finegoldii	3774.13	3771.1	0.153627	No
Bacteroides_fragilis	3724.94	3721.75	0.166022	No
Bacteroides_plebeius	3833.07	3831.85	0.062136	No
Bacteroides_stercoris	3513.28	3509.34	0.242573	No
Bacteroides_thetaiotaomicron	3031.69	3028.47	0.169291	No
Bacteroides_uniformis	2556.29	2553.1	0.16701	No
Bacteroides_vulgatus	2927.31	2924.85	0.115449	No
Bacteroides_xylanisolvens	3204.14	3201.58	0.122236	No
Bifidobacterium_longum	3644.43	3640.71	0.216787	No
Clostridium_asparagiforme	3532.11	3528.56	0.199483	No
Clostridium_bartlettii	3614.98	3611.23	0.220529	No
Clostridium_bolteae	3517.98	3515.15	0.139237	No
Clostridium_citroniae	3376.94	3374.19	0.134003	No
Clostridium_hathewayi	3491.22	3488.57	0.127499	No
Clostridium_symbiosum	3534.03	3530.61	0.186778	No
Collinsella_aerofaciens	3720.58	3719.05	0.0728781	No
Coprococcus_catus	3578.87	3576.13	0.133462	No
Coprococcus_comes	3538.53	3536.27	0.104523	No
Eubacterium_eligens	3589.15	3586.8	0.109727	No
Eubacterium_ramulus	3496.16	3492.57	0.202985	No
Flavonifractor_plautii	3455.05	3452.45	0.124476	No
Holdemania_filiformis	3496.67	3495.04	0.07625	No
Klebsiella_pneumoniae	3551.48	3548.59	0.143426	No
Parabacteroides_johnsonii	3606.03	3603.46	0.122258	No
Parabacteroides_merdae	3814.46	3812.61	0.0850924	No
Prevotella_copri	3791.06	3788.34	0.131927	No
Roseburia_hominis	3570.4	3568.18	0.102695	No
Ruminococcus_callidus	3833.2	3831.08	0.0978011	No
Ruminococcus_gnavus	3613.42	3610.67	0.133848	No
Ruminococcus_torques	1143.45	1141.38	0.0950986	No
Streptococcus_anginosus	3249.48	3246.25	0.170271	No
Veillonella_parvula	3513.89	3511.02	0.141953	No
Adlercreutzia_equolifaciens	3542.87	3541.76	0.0589928	No
Bilophila_unclassified	3343.1	3339.18	0.241246	No
Burkholderiales_bacterium_1_1_47	3648.11	3644.23	0.235303	No
Coprobacillus_unclassified	3628.35	3626.78	0.0740697	No
Eggerthella_unclassified	3419.38	3416.75	0.125758	No
Erysipelotrichaceae_bacterium_2_2_44A	3193.21	3192.35	0.0518236	No
Granulicatella_unclassified	3296.11	3293.28	0.139375	No
Lachnospiraceae_bacterium_2_1_58FAA	3605.28	3602.68	0.124039	No
Megamonas_unclassified	3682.1	3680.49	0.0757219	No
Oscillibacter_unclassified	3199.4	3195.71	0.213599	No
Parabacteroides_unclassified	4000.87	3999.38	0.0713383	No
Parasutterella_excrementihominis	3636.74	3634.13	0.125088	No
Ruminococcus_sp_5_1_39BFAA	3817.66	3813.89	0.222548	No
Subdoligranulum_unclassified	2142.22	2138.33	0.236421	No
Veillonella_unclassified	3229.22	3228.28	0.0542596	No
Bacteroides_nordii	3489	3486.13	0.142006	No
Clostridium_leptum	3303.28	3302.11	0.060685	No
Clostridium_nexile	3668.2	3664.22	0.247714	No
Clostridium_ramosum	3400.13	3397.45	0.129223	No
Parabacteroides_goldsteinii	3642.47	3638.99	0.191846	No
Streptococcus_australis	3476.42	3473.9	0.119427	No
Streptococcus_parasanguinis	3383.69	3380.73	0.149011	No
Anaerotruncus_unclassified	3496.68	3495.31	0.0672037	No
Lachnospiraceae_bacterium_3_1_46FAA	3496.99	3495.2	0.0830287	No
Akkermansia_muciniphila	3682.06	3678.54	0.196709	No
Bifidobacterium_adolescentis	3650.97	3647.96	0.152046	No
Clostridium_clostridioforme	3321.67	3320.65	0.0563613	No
Eggerthella_lenta	3344.19	3340.5	0.214811	No
Gordonibacter_pamelaeae	3401.14	3397.51	0.207189	No
Methanobrevibacter_smithii	3604.73	3601.06	0.212422	No
Streptococcus_thermophilus	3276.11	3275.25	0.0520964	No
Subdoligranulum_variabile	2961.92	2958.58	0.179839	No
Holdemania_unclassified	3447.81	3446.74	0.0577621	No
Mitsuokella_unclassified	3375.36	3372.34	0.153702	No

## Sheet: CRC
	Model-based validations
	AIC_Model2	AIC_Model1	Log-ratio likelihood test	Validated
Actinomyces_odontolyticus	2027.8	2085.61	5.22443e-15	Yes
Alistipes_shahii	2375.93	2376.81	0.0450627	Yes
Anaerostipes_hadrus	2170.44	2173.14	0.015058	Yes
Bacteroides_eggerthii	2522.92	2525.87	0.0130326	Yes
Bacteroides_fragilis	2552.3	2566.49	2.86357e-05	Yes
Bacteroides_nordii	2279.92	2285.79	0.0025119	Yes
Barnesiella_intestinihominis	2594.49	2598.93	0.00557941	Yes
Bifidobacterium_animalis	2197.33	2213.58	9.6916e-06	Yes
Bifidobacterium_catenulatum	2348.18	2364.55	9.1301e-06	Yes
Bifidobacterium_dentium	2145.84	2170.04	1.54099e-07	Yes
Bifidobacterium_longum	2364.1	2366.34	0.0198326	Yes
Bilophila_wadsworthia	2237.06	2247.98	0.000162707	Yes
Butyricicoccus_pullicaecorum	1812.44	1843.88	3.68175e-09	Yes
Butyrivibrio_crossotus	2360.54	2372.88	7.60249e-05	Yes
Clostridium_asparagiforme	2274.07	2297.65	2.1238e-07	Yes
Clostridium_bartlettii	2419.48	2422.72	0.0110464	Yes
Clostridium_bolteae	2389.23	2402.31	5.17744e-05	Yes
Clostridium_citroniae	2223.3	2241.08	4.33526e-06	Yes
Clostridium_clostridioforme	2273.7	2291.52	4.23605e-06	Yes
Clostridium_hathewayi	2239.58	2249.01	0.000361109	Yes
Clostridium_hylemonae	1752.2	1799.48	1.10912e-12	Yes
Clostridium_innocuum	2025.24	2043.38	3.5956e-06	Yes
Clostridium_leptum	2030.54	2032.55	0.0225179	Yes
Clostridium_nexile	2296.92	2302.03	0.00381577	Yes
Clostridium_ramosum	2252.61	2269.93	5.52775e-06	Yes
Desulfovibrio_desulfuricans	2164.39	2176.86	7.13611e-05	Yes
Desulfovibrio_piger	2238.15	2247.21	0.000439471	Yes
Eggerthella_lenta	2236.18	2261.86	7.1364e-08	Yes
Escherichia_coli	2324.42	2330	0.00295749	Yes
Eubacterium_biforme	2524.02	2538.12	3.00489e-05	Yes
Eubacterium_eligens	2350.28	2352.34	0.0218989	Yes
Eubacterium_hallii	2024.25	2025.93	0.0275737	Yes
Faecalibacterium_prausnitzii	1417.96	1421.44	0.00960974	Yes
Fusobacterium_nucleatum	1838.79	1847.54	0.000519128	Yes
Gemella_sanguinis	2051.19	2070.38	2.08361e-06	Yes
Gordonibacter_pamelaeae	2332.15	2337.66	0.00306825	Yes
Holdemania_filiformis	2301.39	2307.77	0.00189484	Yes
Lactobacillus_gasseri	1981.53	2004.67	2.67415e-07	Yes
Lactococcus_lactis	2356.34	2361.6	0.00352667	Yes
Parvimonas_micra	1895.88	1911.93	1.07819e-05	Yes
Peptostreptococcus_stomatis	1980.69	1999.98	1.97798e-06	Yes
Porphyromonas_asaccharolytica	2039.24	2053.76	2.39629e-05	Yes
Pseudoflavonifractor_capillosus	2177.61	2195.02	5.28976e-06	Yes
Roseburia_intestinalis	2394.67	2400.27	0.00291549	Yes
Ruminococcus_albus	2137.44	2149.09	0.000110401	Yes
Ruminococcus_bromii	2391.49	2392.51	0.0413106	Yes
Ruminococcus_callidus	2504.59	2506.42	0.0251602	Yes
Ruminococcus_lactaris	2559.63	2560.87	0.0358551	Yes
Ruminococcus_obeum	1476.38	1479.8	0.00999429	Yes
Solobacterium_moorei	2090.54	2114	2.25267e-07	Yes
Streptococcus_anginosus	2107.74	2159.56	1.09864e-13	Yes
Streptococcus_australis	2260.2	2265.84	0.00284729	Yes
Streptococcus_gordonii	2064.95	2091.34	4.98196e-08	Yes
Streptococcus_infantis	2154.31	2186.61	2.35454e-09	Yes
Streptococcus_mutans	2118.21	2133.35	1.73259e-05	Yes
Streptococcus_vestibularis	2292.19	2312.81	9.85086e-07	Yes
Subdoligranulum_variabile	2081.86	2101.95	1.30394e-06	Yes
Adlercreutzia_equolifaciens	2320.02	2325.66	0.00284975	Yes
Alistipes_senegalensis	2329.34	2336.29	0.00139248	Yes
Clostridiales_bacterium_1_7_47FAA	2218.21	2237.66	1.8216e-06	Yes
Coprobacillus_unclassified	2389.04	2401.12	8.79698e-05	Yes
Coprobacter_fastidiosus	2289.68	2304.31	2.26489e-05	Yes
Erysipelotrichaceae_bacterium_21_3	2185.95	2201.89	1.14158e-05	Yes
Erysipelotrichaceae_bacterium_2_2_44A	2171.48	2185.67	2.86901e-05	Yes
Granulicatella_unclassified	2093.03	2101.99	0.000466018	Yes
Lachnospiraceae_bacterium_1_4_56FAA	2348.81	2362.45	3.8375e-05	Yes
Lachnospiraceae_bacterium_2_1_58FAA	2382.86	2395.11	8.03105e-05	Yes
Lachnospiraceae_bacterium_3_1_57FAA_CT1	2294.54	2303.87	0.000381481	Yes
Lachnospiraceae_bacterium_5_1_63FAA	1996.04	2002.71	0.00161382	Yes
Olsenella_unclassified	1972.1	1982.38	0.000229255	Yes
Parvimonas_unclassified	2056.79	2079.43	3.44692e-07	Yes
Peptostreptococcaceae_noname_unclassified	2436.91	2438.42	0.0305145	Yes
Ruminococcaceae_bacterium_D16	2190.53	2193.48	0.0130242	Yes
Ruminococcus_sp_5_1_39BFAA	2527.9	2536.83	0.000473471	Yes
Scardovia_wiggsiae	1820.74	1859.77	7.48833e-11	Yes
Streptococcus_mitis_oralis_pneumoniae	2219.12	2225.09	0.00237264	Yes
Streptococcus_tigurinus	1880.46	1896.51	1.07762e-05	Yes
Akkermansia_muciniphila	2503.01	2501.58	0.226789	No
Alistipes_indistinctus	2440.58	2438.58	0.488875	No
Alistipes_onderdonkii	2387.97	2386.03	0.404059	No
Alistipes_putredinis	2391.29	2389.7	0.261007	No
Bacteroides_caccae	2564.47	2562.57	0.378015	No
Bacteroides_dorei	2357.55	2355.98	0.254811	No
Bacteroides_faecis	2472.55	2472.69	0.0715032	No
Bacteroides_massiliensis	2642.75	2641.28	0.233382	No
Bacteroides_stercoris	2591.77	2589.91	0.35285	No
Bacteroides_thetaiotaomicron	2374.11	2372.33	0.317923	No
Bacteroides_vulgatus	2051.15	2050.27	0.145019	No
Bacteroides_xylanisolvens	2335.3	2333.49	0.332864	No
Bifidobacterium_adolescentis	2476.01	2474.34	0.282812	No
Collinsella_aerofaciens	2439.61	2437.88	0.301092	No
Coprococcus_catus	2389.91	2389.99	0.0745024	No
Coprococcus_comes	2267.88	2265.99	0.372505	No
Dialister_invisus	2653.35	2651.53	0.333325	No
Dorea_formicigenerans	2128.88	2128.62	0.0933596	No
Eubacterium_ramulus	2360.84	2359.74	0.171541	No
Eubacterium_rectale	1828.18	1828.78	0.0533965	No
Eubacterium_ventriosum	2440.81	2440.29	0.111441	No
Haemophilus_parainfluenzae	2407.3	2407.22	0.0829524	No
Parabacteroides_distasonis	2424.13	2423.34	0.13605	No
Parabacteroides_merdae	2566.75	2564.82	0.397274	No
Prevotella_copri	2598.21	2598.88	0.0509757	No
Ruminococcus_torques	1011.41	1010.1	0.203453	No
Streptococcus_thermophilus	2361.99	2361.15	0.141179	No
Veillonella_parvula	2294.88	2294.17	0.128658	No
Bacteroidales_bacterium_ph8	2500.45	2500.95	0.056746	No
Escherichia_unclassified	2428.53	2426.63	0.378867	No
Lachnospiraceae_bacterium_1_1_57FAA	2568.82	2567.38	0.227394	No
Lachnospiraceae_bacterium_3_1_46FAA	2183.19	2182.95	0.0918664	No
Lachnospiraceae_bacterium_7_1_58FAA	1715.77	1713.81	0.424383	No
Oscillibacter_unclassified	1790.29	1788.34	0.412791	No
Paraprevotella_unclassified	2500.33	2499.73	0.118412	No
Subdoligranulum_sp_4_3_54A2FAA	2577.35	2576.86	0.109522	No
Subdoligranulum_unclassified	945.601	943.603	0.483192	No
Veillonella_unclassified	2147.16	2145.22	0.405504	No

## Sheet: Polyps
	Model-based validations
	AIC_Model2	AIC_Model1	Log-ratio likelihood test	Validated
Actinomyces_odontolyticus	861.053	862.762	0.0270616	Yes
Alistipes_shahii	925.861	927.245	0.0329128	Yes
Bacteroides_cellulosilyticus	988.394	991.386	0.0127329	Yes
Bacteroides_clarus	927.955	932.959	0.00406665	Yes
Bacteroides_dorei	901.409	906.799	0.00327903	Yes
Bacteroides_faecis	939.817	940.879	0.0400629	Yes
Bacteroides_fragilis	983.557	992.155	0.000565967	Yes
Bacteroides_uniformis	723.468	724.228	0.0483236	Yes
Clostridium_innocuum	811.129	815.147	0.007082	Yes
Collinsella_aerofaciens	983.827	985.135	0.0344673	Yes
Eggerthella_lenta	894.612	897.85	0.0110468	Yes
Escherichia_coli	929.493	936.241	0.00155036	Yes
Eubacterium_ramulus	886.98	890.73	0.00824304	Yes
Ruminococcus_bromii	842.479	843.203	0.049433	Yes
Ruminococcus_callidus	1004.01	1005.02	0.0413025	Yes
Streptococcus_gordonii	901.025	902.394	0.033208	Yes
Streptococcus_infantis	885.911	887.376	0.031347	Yes
Streptococcus_sanguinis	865.554	869.108	0.00921453	Yes
Bacteroidales_bacterium_ph8	953.917	960.15	0.00205699	Yes
Coprococcus_sp_ART55_1	1046.96	1056.06	0.000431458	Yes
Erysipelotrichaceae_bacterium_2_2_44A	883.173	885.859	0.0152045	Yes
Escherichia_unclassified	963.218	964.892	0.0276344	Yes
Peptostreptococcaceae_noname_unclassified	977.909	980.987	0.0121182	Yes
Roseburia_unclassified	914.312	915.644	0.0339712	Yes
Sutterella_wadsworthensis	934.246	939.331	0.00388605	Yes
Actinomyces_graevenitzii	871.393	870.349	0.164139	No
Anaerostipes_hadrus	675.382	675.763	0.0614005	No
Bacteroides_eggerthii	1004.75	1004.63	0.0851745	No
Bacteroides_ovatus	797.287	796.214	0.167758	No
Bacteroides_thetaiotaomicron	907.62	907.89	0.0659516	No
Bacteroides_xylanisolvens	908.288	907.614	0.124776	No
Bifidobacterium_catenulatum	1000.52	998.575	0.410886	No
Bifidobacterium_longum	898.049	896.067	0.445828	No
Bifidobacterium_pseudocatenulatum	987.821	987.137	0.125652	No
Bilophila_wadsworthia	885.006	885.23	0.0679389	No
Clostridium_asparagiforme	912.129	912.583	0.0586248	No
Clostridium_hathewayi	913.852	914.521	0.0511434	No
Clostridium_leptum	792.534	790.904	0.271342	No
Clostridium_ramosum	907.124	906.718	0.10335	No
Eubacterium_hallii	721.615	721.665	0.0761136	No
Eubacterium_rectale	724.102	722.84	0.195098	No
Eubacterium_siraeum	982.673	981.281	0.217875	No
Faecalibacterium_prausnitzii	545.428	544.151	0.197597	No
Gordonibacter_pamelaeae	941.857	940.498	0.211552	No
Holdemania_filiformis	919.553	917.563	0.460071	No
Odoribacter_splanchnicus	961.887	959.994	0.371767	No
Phascolarctobacterium_succinatutens	1026.43	1026.04	0.101849	No
Roseburia_intestinalis	916.876	916.067	0.137507	No
Rothia_mucilaginosa	890.997	889.699	0.201	No
Ruminococcus_lactaris	1016.34	1014.53	0.32972	No
Solobacterium_moorei	867.418	865.419	0.489536	No
Streptococcus_anginosus	926.844	926.991	0.0714374	No
Streptococcus_australis	910.116	908.422	0.290192	No
Streptococcus_thermophilus	912.992	912.9	0.0835887	No
Adlercreutzia_equolifaciens	936.251	935	0.193469	No
Alistipes_senegalensis	899.521	899.952	0.0594811	No
Bilophila_unclassified	942.534	941.199	0.207348	No
Burkholderiales_bacterium_1_1_47	880.49	878.811	0.285403	No
Butyrivibrio_unclassified	855.334	855.377	0.076431	No
Coprobacillus_unclassified	964.967	964.317	0.122669	No
Granulicatella_unclassified	853.665	852.4	0.19569	No
Holdemania_unclassified	906.682	905.981	0.127158	No
Lachnospiraceae_bacterium_1_1_57FAA	1019.72	1018.59	0.174969	No
Lachnospiraceae_bacterium_2_1_58FAA	947.864	946.989	0.144399	No
Lachnospiraceae_bacterium_3_1_46FAA	890.507	889.224	0.198538	No
Lachnospiraceae_bacterium_3_1_57FAA_CT1	932.206	931.069	0.176495	No
Mitsuokella_unclassified	898.568	896.639	0.394545	No
Olsenella_unclassified	860.395	858.878	0.243379	No
Parasutterella_excrementihominis	865.027	863.53	0.239199	No
Ruminococcus_sp_5_1_39BFAA	902.635	901.842	0.135972	No
Veillonella_unclassified	795.182	793.222	0.421326	No
