# Supplementary material for: Adjusting for age improves identification of gut microbiome alterations in multiple diseases
Source: eLife. 2020 Mar 11;9:e50240. doi: 10.7554/eLife.50240 (PMC7065848; doi:10.7554/eLife.50240)
Supplement: Figure 3—source data 3. [file elife-50240-fig3-data3.xlsx]

## Sheet: Sheet1
Figure 3-source data 3: Markers identified in the original datasets for (A) T2D, (B) IBD, (C) Cirrhosis, (D) CRC, and (E) Polyps as either significantly different between the diseased and control cohorts or having discriminatory power for the classification of diseased samples from microbiome composition.

## Sheet: T2D
Dataset	Marker
QinJ_2012	Akkermansia_muciniphila
QinJ_2012	Alistipes_indistinctus
QinJ_2012	Bacteroides_intestinalis
QinJ_2012	Clostridium_bolteae
QinJ_2012	Clostridium_hathewayi
QinJ_2012	Clostridium_leptum
QinJ_2012	Clostridium_methylpentosum
QinJ_2012	Clostridium_symbiosum
QinJ_2012	Coprococcus_eutactus
QinJ_2012	Eggerthella_lenta
QinJ_2012	Escherichia_coli
QinJ_2012	Eubacterium_eligens
QinJ_2012	Eubacterium_rectale
QinJ_2012	Faecalibacterium_prausnitzii
QinJ_2012	Flavonifractor_plautii
QinJ_2012	Haemophilus_parainfluenzae
QinJ_2012	Pseudoflavonifractor_capillosus
QinJ_2012	Roseburia_intestinalis
QinJ_2012	Roseburia_inulinivorans
QinJ_2012	Bacteroides_sp_2_1_22
QinJ_2012	Erysipelotrichaceae_bacterium_21_3
QinJ_2012	Oscillibacter_valericigenes
QinJ_2012	Subdoligranulum_sp_4_3_54A2FAA
KarlssonFH_2013	Alistipes_shahii
KarlssonFH_2013	Bacteroides_dorei
KarlssonFH_2013	Bacteroides_ovatus
KarlssonFH_2013	Clostridium_bolteae
KarlssonFH_2013	Clostridium_clostridioforme
KarlssonFH_2013	Clostridium_methylpentosum
KarlssonFH_2013	Coprococcus_comes
KarlssonFH_2013	Eubacterium_eligens
KarlssonFH_2013	Faecalibacterium_prausnitzii
KarlssonFH_2013	Lactobacillus_antri
KarlssonFH_2013	Lactobacillus_crispatus
KarlssonFH_2013	Lactobacillus_gasseri
KarlssonFH_2013	Lactobacillus_oris
KarlssonFH_2013	Lactobacillus_reuteri
KarlssonFH_2013	Lactobacillus_salivarius
KarlssonFH_2013	Roseburia_intestinalis
KarlssonFH_2013	Streptococcus_anginosus
KarlssonFH_2013	Streptococcus_mutans

## Sheet: IBD
Dataset	Marker
FranzosaEA_2018	Dorea_formicigenerans
FranzosaEA_2018	Roseburia_hominis
FranzosaEA_2018	Adlercreutzia_equolifaciens
FranzosaEA_2018	Ruminococcus_obeum
FranzosaEA_2018	Bacteroidales_bacterium_ph8
FranzosaEA_2018	Dorea_longicatena
FranzosaEA_2018	Coprococcus_catus
FranzosaEA_2018	Coprococcus_comes
FranzosaEA_2018	Eubacterium_ramulus
FranzosaEA_2018	Eubacterium_ventriosum
FranzosaEA_2018	Ruminococcus_gnavus
FranzosaEA_2018	Gordonibacter_pamelaeae
FranzosaEA_2018	Alistipes_shahii
FranzosaEA_2018	Roseburia_inulinivorans
FranzosaEA_2018	Eubacterium_hallii
FranzosaEA_2018	Faecalibacterium_prausnitzii
FranzosaEA_2018	Escherichia_coli
FranzosaEA_2018	Ruminococcus_sp_5_1_39BFAA
FranzosaEA_2018	Alistipes_finegoldii
FranzosaEA_2018	Anaerostipes_hadrus
FranzosaEA_2018	Clostridium_clostridioforme
FranzosaEA_2018	Subdoligranulum_unclassified
FranzosaEA_2018	Escherichia_unclassified
FranzosaEA_2018	Anaerotruncus_unclassified
FranzosaEA_2018	Eubacterium_siraeum
FranzosaEA_2018	Roseburia_unclassified
FranzosaEA_2018	Eubacterium_eligens
FranzosaEA_2018	Ruminococcus_lactaris
FranzosaEA_2018	Lactobacillus_gasseri

## Sheet: Cirrhosis
Dataset	Marker
QinN_2014	Alistipes_indistinctus
QinN_2014	Bacteroides_clarus
QinN_2014	Bacteroides_uniformis
QinN_2014	Bilophila_wadsworthia
QinN_2014	Coprococcus_comes
QinN_2014	Faecalibacterium_prausnitzii
QinN_2014	Veillonella_atypica
QinN_2014	Aggregatibacter_segnis
QinN_2014	Bifidobacterium_dentium
QinN_2014	Campylobacter_sp_10_1_50
QinN_2014	Clostridium_perfringens
QinN_2014	Clostridium_symbiosum
QinN_2014	Fusobacterium_nucleatum
QinN_2014	Haemophilus_parainfluenzae
QinN_2014	Lactobacillus_fermentum
QinN_2014	Lactobacillus_mucosae
QinN_2014	Lactobacillus_salivarius
QinN_2014	Megasphaera_micronuciformis
QinN_2014	Prevotella_buccae
QinN_2014	Ruminococcus_gnavus
QinN_2014	Streptococcus_anginosus
QinN_2014	Streptococcus_oralis
QinN_2014	Streptococcus_parasanguinis
QinN_2014	Streptococcus_salivarius
QinN_2014	Streptococcus_sp_2_1_36FAA
QinN_2014	Streptococcus_vestibularis
QinN_2014	Veillonella_dispar
QinN_2014	Veillonella_parvula

## Sheet: CRC
Dataset	Marker*
ThomasAM_2018	Peptostreptococcus_stomatis
ThomasAM_2018	Fusobacterium_nucleatum
ThomasAM_2018	Parvimonas_unclassified
ThomasAM_2018	Parvimonas_micra
ThomasAM_2018	Gemella_morbillorum
ThomasAM_2018	Lachnospiraceae_3_1_57FAA_CT1
ThomasAM_2018	Escherichia_coli
ThomasAM_2018	Porphyromonas_asachharolytica
ThomasAM_2018	Clostridium_hathewayi
ThomasAM_2018	Lachnospiraceae_5_1_63FAA
ThomasAM_2018	Clostridium_leptum
ThomasAM_2018	Streptococcus_salivarius
ThomasAM_2018	Streptococcus_parasanguinis
ThomasAM_2018	Prevotella_copri
ThomasAM_2018	Ruminococcus_gnavus
ThomasAM_2018	Subdoligranulum_unclassified
ThomasAM_2018	Bifidobacterium_longum
ThomasAM_2018	Eubacterium_eligens
ThomasAM_2018	Clostridium_symbiosum
* Only those markers that are detected in both the original and the validation cohorts are listed here. Five of the species, namely Anaerotruncus colihominis, Actinomyces graevenitzii, Dialister invisus, Lachnospiraceae 8 1 57FAA and Alistipes_unclassified could not be detected within the top 85 percentile markers across any of the age-groups in our discovery cohorts.
										_252

## Sheet: Adenoma
Dataset	Marker
FengQ_2015	Bifidobacterium_animalis
FengQ_2015	Streptococcus_mutans
FengQ_2015	Streptococcus_anginosus
FengQ_2015	Bacteroides_dorei
FengQ_2015	Bacteroides_massiliensis
