# Supplementary material for: Adjusting for age improves identification of gut microbiome alterations in multiple diseases
Source: eLife. 2020 Mar 11;9:e50240. doi: 10.7554/eLife.50240 (PMC7065848; doi:10.7554/eLife.50240)
Supplement: Figure 5—source data 1. — 1: Increased −1: Decreased. Identified using Mann-Whitney U test with FDR corrected P-values less than 0.1. [file elife-50240-fig5-data1.xlsx]

## Sheet: Legend
Figure 5-source data 1: List of markers having significant increase (gain) or decrease (loss) of abundance with disease across the various age-groups. 1: Increased -1: Decreased. Identified using Mann-Whitney U test with FDR corrected P-values less than 0.1

## Sheet: IBD
	Young	Middle	Elderly
Alistipes_finegoldii	-1	-1	-1
Alistipes_indistinctus	-1	-1	-1
Alistipes_onderdonkii	-1	-1	-1
Alistipes_putredinis	-1	-1	-1
Alistipes_shahii	-1	-1	-1
Anaerotruncus_unclassified	-1	-1	-1
Bacteroidales_bacterium_ph8	-1	-1	-1
Bacteroides_cellulosilyticus	-1	-1	-1
Bacteroides_thetaiotaomicron	-1	-1	-1
Bacteroides_xylanisolvens	-1	-1	-1
Eubacterium_siraeum	-1	-1	-1
Odoribacter_splanchnicus	-1	-1	-1
Pseudoflavonifractor_capillosus	-1	-1	-1
Roseburia_hominis	-1	-1	-1
Ruminococcus_bromii	-1	-1	-1
Subdoligranulum_unclassified	-1	-1	-1
Bacteroides_uniformis	-1	-1	0
Coprococcus_sp_ART55_1	-1	-1	0
Alistipes_senegalensis	-1	0	-1
Desulfovibrio_desulfuricans	-1	0	-1
Parabacteroides_merdae	-1	0	-1
Ruminococcus_albus	-1	0	-1
Bacteroides_caccae	-1	0	0
Bacteroides_ovatus	-1	0	0
Bacteroides_stercoris	-1	0	0
Bacteroides_vulgatus	-1	0	0
Eubacterium_rectale	-1	0	0
Ruminococcus_callidus	-1	0	0
Akkermansia_muciniphila	0	-1	-1
Bacteroides_intestinalis	0	-1	-1
Barnesiella_intestinihominis	0	-1	-1
Butyrivibrio_crossotus	0	-1	-1
Coprobacter_fastidiosus	0	-1	-1
Oxalobacter_formigenes	0	-1	-1
Parabacteroides_goldsteinii	0	-1	-1
Collinsella_aerofaciens	0	-1	0
Lachnospiraceae_bacterium_3_1_57FAA_CT1	0	-1	0
Methanobrevibacter_smithii	0	-1	0
Methanobrevibacter_unclassified	0	-1	0
Ruminococcus_lactaris	0	-1	0
Actinomyces_odontolyticus	0	0	-1
Anaerotruncus_colihominis	0	0	-1
Atopobium_parvulum	0	0	-1
Bacteroides_nordii	0	0	-1
Bilophila_unclassified	0	0	-1
Bilophila_wadsworthia	0	0	-1
Burkholderiales_bacterium_1_1_47	0	0	-1
Clostridium_citroniae	0	0	-1
Clostridium_innocuum	0	0	-1
Eubacterium_ramulus	0	0	-1
Gemella_sanguinis	0	0	-1
Granulicatella_adiacens	0	0	-1
Granulicatella_unclassified	0	0	-1
Haemophilus_parainfluenzae	0	0	-1
Holdemania_filiformis	0	0	-1
Mitsuokella_unclassified	0	0	-1
Olsenella_unclassified	0	0	-1
Ruminococcus_flavefaciens	0	0	-1
Solobacterium_moorei	0	0	-1
Streptococcus_gordonii	0	0	-1
Streptococcus_infantis	0	0	-1
Streptococcus_mitis_oralis_pneumoniae	0	0	-1
Subdoligranulum_variabile	0	0	-1
Sutterella_wadsworthensis	0	0	-1
Parasutterella_excrementihominis	0	0	1
Acidaminococcus_unclassified	0	1	0
Blautia_hydrogenotrophica	0	1	0
Enterococcus_faecium	0	1	0
Lachnospiraceae_bacterium_2_1_58FAA	0	1	0
Escherichia_unclassified	1	-1	0
Eubacterium_ventriosum	1	0	-1
Roseburia_inulinivorans	1	0	-1
Rothia_mucilaginosa	1	0	-1
Streptococcus_australis	1	0	-1
Streptococcus_sanguinis	1	0	-1
Anaerostipes_hadrus	1	0	0
Bifidobacterium_adolescentis	1	0	0
Bifidobacterium_animalis	1	0	0
Bifidobacterium_bifidum	1	0	0
Bifidobacterium_longum	1	0	0
Blautia_producta	1	0	0
Clostridiales_bacterium_1_7_47FAA	1	0	0
Clostridium_asparagiforme	1	0	0
Clostridium_bartlettii	1	0	0
Clostridium_bolteae	1	0	0
Clostridium_hathewayi	1	0	0
Clostridium_nexile	1	0	0
Clostridium_ramosum	1	0	0
Clostridium_scindens	1	0	0
Clostridium_symbiosum	1	0	0
Coprobacillus_unclassified	1	0	0
Dialister_invisus	1	0	0
Eggerthella_lenta	1	0	0
Eggerthella_unclassified	1	0	0
Erysipelotrichaceae_bacterium_2_2_44A	1	0	0
Erysipelotrichaceae_bacterium_21_3	1	0	0
Escherichia_coli	1	0	0
Lachnospiraceae_bacterium_1_4_56FAA	1	0	0
Lachnospiraceae_bacterium_5_1_57FAA	1	0	0
Lachnospiraceae_bacterium_5_1_63FAA	1	0	0
Lachnospiraceae_bacterium_6_1_63FAA	1	0	0
Lachnospiraceae_bacterium_9_1_43BFAA	1	0	0
Lactococcus_lactis	1	0	0
Ruminococcus_sp_5_1_39BFAA	1	0	0
Streptococcus_thermophilus	1	0	0
Streptococcus_vestibularis	1	0	0
Streptococcus_parasanguinis	1	0	1
Streptococcus_salivarius	1	0	1
Clostridium_clostridioforme	1	1	0
Clostridium_leptum	1	1	0
Flavonifractor_plautii	1	1	0
Lachnospiraceae_bacterium_1_1_57FAA	1	1	0
Ruminococcus_gnavus	1	1	0

## Sheet: T2D
	Young	Middle	Elderly
Peptostreptococcaceae_noname_unclassified	-1	-1	0
Anaerostipes_hadrus	0	-1	-1
Eubacterium_rectale	0	-1	-1
Bacteroides_coprocola	0	-1	0
Bacteroides_plebeius	0	-1	0
Eubacterium_eligens	0	-1	0
Faecalibacterium_prausnitzii	0	-1	0
Haemophilus_parainfluenzae	0	-1	0
Prevotella_stercorea	0	-1	0
Roseburia_intestinalis	0	-1	0
Roseburia_inulinivorans	0	-1	0
Veillonella_atypica	0	-1	0
Veillonella_unclassified	0	-1	0
Akkermansia_muciniphila	0	0	-1
Alistipes_onderdonkii	0	0	-1
Alistipes_senegalensis	0	0	-1
Alistipes_shahii	0	0	-1
Bacteroidales_bacterium_ph8	0	0	-1
Barnesiella_intestinihominis	0	0	-1
Bifidobacterium_adolescentis	0	0	-1
Bifidobacterium_animalis	0	0	-1
Bifidobacterium_longum	0	0	-1
Clostridium_bartlettii	0	0	-1
Coprobacter_fastidiosus	0	0	-1
Coprococcus_comes	0	0	-1
Dorea_longicatena	0	0	-1
Erysipelotrichaceae_bacterium_21_3	0	0	-1
Eubacterium_siraeum	0	0	-1
Methanobrevibacter_smithii	0	0	-1
Odoribacter_splanchnicus	0	0	-1
Pseudoflavonifractor_capillosus	0	0	-1
Streptococcus_thermophilus	0	0	-1
Subdoligranulum_sp_4_3_54A2FAA	0	0	-1
Subdoligranulum_unclassified	0	0	-1
Butyrivibrio_unclassified	0	0	1
Clostridium_asparagiforme	0	0	1
Clostridium_symbiosum	0	0	1
Klebsiella_pneumoniae	0	0	1
Clostridium_leptum	0	1	0
Clostridium_ramosum	0	1	0
Lachnospiraceae_bacterium_3_1_57FAA_CT1	0	1	0
Megasphaera_unclassified	0	1	0
Olsenella_unclassified	0	1	0
Streptococcus_anginosus	0	1	0
Streptococcus_sanguinis	0	1	0
Clostridiales_bacterium_1_7_47FAA	0	1	1
Clostridium_citroniae	0	1	1
Clostridium_hathewayi	0	1	1
Parabacteroides_unclassified	0	1	1
Granulicatella_adiacens	1	0	0
Erysipelotrichaceae_bacterium_2_2_44A	1	1	0
Clostridium_bolteae	1	1	1

## Sheet: CRC
	Middle	Elderly
Bacteroides_uniformis	-1	0
Butyrivibrio_crossotus	-1	0
Clostridium_innocuum	-1	0
Desulfovibrio_desulfuricans	-1	0
Bacteroidales_bacterium_ph8	0	-1
Barnesiella_intestinihominis	0	-1
Bifidobacterium_animalis	0	-1
Bifidobacterium_longum	0	-1
Eubacterium_hallii	0	-1
Eubacterium_rectale	0	-1
Lachnospiraceae_bacterium_5_1_63FAA	0	-1
Roseburia_hominis	0	-1
Bacteroides_massiliensis	0	1
Flavonifractor_plautii	0	1
Ruminococcus_gnavus	0	1
Ruminococcus_torques	0	1
Actinomyces_graevenitzii	1	0
Actinomyces_odontolyticus	1	0
Atopobium_parvulum	1	0
Bacteroides_fragilis	1	0
Bifidobacterium_dentium	1	0
Bilophila_wadsworthia	1	0
Blautia_producta	1	0
Butyricicoccus_pullicaecorum	1	0
Clostridiales_bacterium_1_7_47FAA	1	0
Clostridium_clostridioforme	1	0
Clostridium_hylemonae	1	0
Clostridium_ramosum	1	0
Coprobacillus_unclassified	1	0
Desulfovibrio_piger	1	0
Eggerthella_lenta	1	0
Erysipelotrichaceae_bacterium_2_2_44A	1	0
Erysipelotrichaceae_bacterium_21_3	1	0
Escherichia_coli	1	0
Eubacterium_biforme	1	0
Eubacterium_cylindroides	1	0
Gemella_sanguinis	1	0
Granulicatella_unclassified	1	0
Holdemania_filiformis	1	0
Lachnospiraceae_bacterium_3_1_57FAA_CT1	1	0
Lactobacillus_gasseri	1	0
Lactococcus_lactis	1	0
Methanobrevibacter_unclassified	1	0
Olsenella_unclassified	1	0
Pseudoflavonifractor_capillosus	1	0
Rothia_mucilaginosa	1	0
Scardovia_wiggsiae	1	0
Streptococcus_anginosus	1	0
Streptococcus_constellatus	1	0
Streptococcus_gordonii	1	0
Streptococcus_infantis	1	0
Streptococcus_parasanguinis	1	0
Streptococcus_sanguinis	1	0
Streptococcus_tigurinus	1	0
Streptococcus_vestibularis	1	0
Subdoligranulum_variabile	1	0
Veillonella_atypica	1	0
Clostridium_asparagiforme	1	1
Clostridium_bolteae	1	1
Clostridium_citroniae	1	1
Clostridium_hathewayi	1	1
Clostridium_symbiosum	1	1
Fusobacterium_nucleatum	1	1
Gemella_morbillorum	1	1
Granulicatella_adiacens	1	1
Parvimonas_micra	1	1
Parvimonas_unclassified	1	1
Peptostreptococcus_stomatis	1	1
Porphyromonas_asaccharolytica	1	1
Prevotella_copri	1	1
Ruminococcaceae_bacterium_D16	1	1
Solobacterium_moorei	1	1
Streptococcus_mitis_oralis_pneumoniae	1	1

## Sheet: Cirrhosis
	Young	Middle	Elderly
Adlercreutzia_equolifaciens	-1	-1	0
Bacteroides_uniformis	-1	-1	0
Bilophila_unclassified	-1	-1	0
Bilophila_wadsworthia	-1	-1	0
Lachnospiraceae_bacterium_1_1_57FAA	-1	0	0
Lachnospiraceae_bacterium_3_1_46FAA	-1	0	0
Oscillibacter_unclassified	-1	0	0
Alistipes_indistinctus	0	-1	-1
Bacteroidales_bacterium_ph8	0	-1	0
Coprococcus_catus	0	-1	0
Coprococcus_comes	0	-1	0
Dorea_longicatena	0	-1	0
Eubacterium_hallii	0	-1	0
Eubacterium_ramulus	0	-1	0
Eubacterium_ventriosum	0	-1	0
Holdemania_filiformis	0	-1	0
Peptostreptococcaceae_noname_unclassified	0	-1	0
Prevotella_stercorea	0	-1	0
Ruminococcus_obeum	0	-1	0
Subdoligranulum_unclassified	0	-1	0
Bacteroides_fragilis	0	1	0
Bifidobacterium_dentium	0	1	0
Clostridium_hathewayi	0	1	0
Clostridium_perfringens	0	1	0
Clostridium_symbiosum	0	1	0
Coprobacillus_unclassified	0	1	0
Lactobacillus_mucosae	0	1	0
Prevotella_buccae	0	1	0
Prevotella_copri	0	1	0
Ruminococcus_gnavus	0	1	0
Dialister_invisus	1	-1	0
Aggregatibacter_segnis	1	0	0
Clostridium_ramosum	1	0	0
Haemophilus_haemolyticus	1	0	0
Streptococcus_infantis	1	0	0
Actinobacillus_unclassified	1	1	0
Campylobacter_concisus	1	1	0
Clostridium_nexile	1	1	0
Fusobacterium_mortiferum	1	1	0
Fusobacterium_nucleatum	1	1	0
Haemophilus_parainfluenzae	1	1	0
Rothia_mucilaginosa	1	1	0
Streptococcus_gordonii	1	1	0
Streptococcus_mitis_oralis_pneumoniae	1	1	0
Streptococcus_salivarius	1	1	0
Streptococcus_vestibularis	1	1	0
Lactobacillus_salivarius	1	1	1
Megasphaera_micronuciformis	1	1	1
Streptococcus_anginosus	1	1	1
Streptococcus_parasanguinis	1	1	1
Veillonella_atypica	1	1	1
Veillonella_dispar	1	1	1
Veillonella_parvula	1	1	1
Veillonella_unclassified	1	1	1

## Sheet: Polyps
	Middle	Elderly
Alistipes_shahii	-1	-1
Bacteroides_ovatus	-1	-1
Alistipes_onderdonkii	0	-1
Alistipes_putredinis	0	-1
Bacteroidales_bacterium_ph8	0	-1
Bacteroides_xylanisolvens	0	-1
Barnesiella_intestinihominis	0	-1
Lactococcus_lactis	0	-1
Granulicatella_unclassified	0	1
Ruminococcus_torques	0	1
Solobacterium_moorei	0	1
Streptococcus_mitis_oralis_pneumoniae	0	1
Actinomyces_odontolyticus	1	0
Subdoligranulum_variabile	1	0
