# Supplementary material for: Adjusting for age improves identification of gut microbiome alterations in multiple diseases
Source: eLife. 2020 Mar 11;9:e50240. doi: 10.7554/eLife.50240 (PMC7065848; doi:10.7554/eLife.50240)
Supplement: Figure 6—source data 1. — The direction of association is obtained by performing a wilcox test of the abundance of each feature in the Low Frailty (HighFIM or HighBarthel) and the High Frailty (LowFIM or Low Barthel) individuals. −1 indicates increase with frailty and +1 indicates decrease with frailty. For each measure, the association of the measure with respect to the abundance of each marker species after taking into account the medication type (computed using Envfit) is also shown, indicating that the association of the markers with either of the measures is significant even after taking account the medication. (C) Top 15 markers of FIM prediction in the Elderly individuals with High Medication Usage and Low Medication Usage. The top markers for Frailty predictions across the entire dataset are highlighted in Green. [file elife-50240-fig6-data1.xlsx]

## Sheet: Sheet1
Figure 6-source data 1: Top 17 predictive features for (A) FIM and (B) Barthel Score in the ELDERMET cohort. The direction of association is obtained by performing a wilcox test of the abundance of each feature in the Low Frailty (HighFIM or HighBarthel) and the High Frailty (LowFIM or Low Barthel) individuals. -1 indicates increase with frailty and +1 indicates decrease with frailty. For each me…
(A) FIM	RandomForest (cv=4)	Envfit (Confounder: Medication type)					(B) Barthel Score	RandomForest (cv=4)	Envfit (Confounder: Medication type)
Features	IncNodePurity	Direction	R2	P-value			Features	IncNodePurity	Direction	R2	P-value
Clostridiales_bacterium_1_7_47FAA	18.1103	-1	0.33	0.001			Clostridiales_bacterium_1_7_47FAA	19.9451	-1	0.33	0.001
Clostridium_leptum	15.379	-1	0.23	0.001			Clostridium_scindens	12.4548	-1	0.23	0.001
Clostridium_scindens	11.5863	-1	0.16	0.001			Clostridium_leptum	11.0978	-1	0.2	0.001
Clostridium_clostridioforme	5.17513	-1	0.14	0.001			Clostridium_clostridioforme	5.79599	-1	0.15	0.001
Eubacterium_sp_3_1_31	3.30799	-1	0.15	0.001			Clostridium_hathewayi	4.21815	-1	0.07	0.01
Ruminococcus_torques	2.63475	-1	0.17	0.001			Eubacterium_sp_3_1_31	3.81714	-1	0.15	0.001
Clostridium_hathewayi	2.39476	-1	0.00014	0.23			Ruminococcus_torques	2.27645	-1	0.18	0.001
Clostridium_bolteae	1.68824	-1	0.13	0.001			Clostridium_symbiosum	1.64885	-1	0.21	0.001
					(C) Top 15 Predictors of FIM
					High Drug Usage	Low Drug Usage
					Clostridium_leptum	Clostridiales_bacterium_1_7_47FAA
					Clostridiales_bacterium_1_7_47FAA	Eubacterium_sp_3_1_31
					Clostridium_scindens	Clostridium_leptum
					Clostridium_clostridioforme	Clostridium_scindens
					Clostridium_bolteae	Clostridium_innocuum
					Clostridium_asparagiforme	Ruminococcus_torques
					Anaerotruncus_colihominis	Clostridium_bolteae
					Lachnospiraceae_bacterium_2_1_58FAA	Leuconostoc_citreum
					Clostridium_perfringens	Clostridium_hathewayi
					Faecalibacterium_prausnitzii	Lactococcus_lactis
					Eubacterium_sp_3_1_31	Clostridium_symbiosum
					Lachnospiraceae_bacterium_1_4_56FAA	Coprobacillus_unclassified
					Dorea_longicatena	Clostridium_clostridioforme
					Clostridium_hathewayi	Eubacterium_rectale
					Lachnospiraceae_bacterium_7_1_58FAA	Methanobrevibacter_smithii
