# Supplementary material for: Adjusting for age improves identification of gut microbiome alterations in multiple diseases
Source: eLife. 2020 Mar 11;9:e50240. doi: 10.7554/eLife.50240 (PMC7065848; doi:10.7554/eLife.50240)
Supplement: Supplementary file 1. [file elife-50240-supp1.xlsx]

## Sheet: Legend
Supplementary File 1: Details of the samples in (A) the curatedMetagenomicData repository, FranzosaEA_2018 [8] dataset and (B) WirbelJ_2019 [9] and ThomasAJ_Cohort1 and ThomasAJ_Cohort2 [10], used in the current study

## Sheet: curatedMetagenomicData_Franzosa
SampleID	age	study_condition	country	region	age_class	region2	cohort	BMI	gender	antibiotics_usage
M1.20.ST	20	control	FJI	Other	Young	Other	BritoIL_2016	NA	male	NA
M1.22.ST	22	control	FJI	Other	Young	Other	BritoIL_2016	NA	male	NA
M1.23.ST	23	control	FJI	Other	Young	Other	BritoIL_2016	NA	male	NA
M1.24.ST	24	control	FJI	Other	Young	Other	BritoIL_2016	NA	male	NA
M1.25.ST	25	control	FJI	Other	Young	Other	BritoIL_2016	NA	male	NA
M1.26.ST	26	control	FJI	Other	Young	Other	BritoIL_2016	NA	male	NA
M1.27.ST	27	control	FJI	Other	Young	Other	BritoIL_2016	NA	male	NA
M1.29.ST	29	control	FJI	Other	Young	Other	BritoIL_2016	NA	male	NA
M1.35.ST	35	control	FJI	Other	Young	Other	BritoIL_2016	NA	male	NA
M1.36.ST	36	control	FJI	Other	Young	Other	BritoIL_2016	NA	male	NA
M1.37.ST	37	control	FJI	Other	Young	Other	BritoIL_2016	NA	male	NA
M1.38.ST	38	control	FJI	Other	Young	Other	BritoIL_2016	NA	male	NA
M1.42.ST	42	control	FJI	Other	Middle	Other	BritoIL_2016	NA	male	NA
M1.44.ST	44	control	FJI	Other	Middle	Other	BritoIL_2016	NA	male	NA
M1.48.ST	48	control	FJI	Other	Middle	Other	BritoIL_2016	NA	male	NA
M1.52.ST	52	control	FJI	Other	Middle	Other	BritoIL_2016	NA	male	NA
M1.57.ST	57	control	FJI	Other	Middle	Other	BritoIL_2016	NA	male	NA
M1.59.ST	59	control	FJI	Other	Middle	Other	BritoIL_2016	NA	male	NA
M1.61.ST	61	control	FJI	Other	Elderly	Other	BritoIL_2016	NA	male	NA
M1.62.ST	62	control	FJI	Other	Elderly	Other	BritoIL_2016	NA	male	NA
M1.63.ST	63	control	FJI	Other	Elderly	Other	BritoIL_2016	NA	male	NA
M1.64.ST	64	control	FJI	Other	Elderly	Other	BritoIL_2016	NA	male	NA
M1.65.ST	65	control	FJI	Other	Elderly	Other	BritoIL_2016	NA	male	NA
M2.31.ST	31	control	FJI	Other	Young	Other	BritoIL_2016	NA	male	NA
M2.32.ST	32	control	FJI	Other	Young	Other	BritoIL_2016	NA	male	NA
M2.33.ST	33	control	FJI	Other	Young	Other	BritoIL_2016	NA	male	NA
M2.36.ST	36	control	FJI	Other	Young	Other	BritoIL_2016	NA	male	NA
M2.37.ST	37	control	FJI	Other	Young	Other	BritoIL_2016	NA	male	NA
M2.38.ST	38	control	FJI	Other	Young	Other	BritoIL_2016	NA	male	NA
M2.39.ST	39	control	FJI	Other	Young	Other	BritoIL_2016	NA	male	NA
M2.40.ST	40	control	FJI	Other	Middle	Other	BritoIL_2016	NA	male	NA
M2.41.ST	41	control	FJI	Other	Middle	Other	BritoIL_2016	NA	male	NA
M2.44.ST	44	control	FJI	Other	Middle	Other	BritoIL_2016	NA	male	NA
M2.45.ST	45	control	FJI	Other	Middle	Other	BritoIL_2016	NA	male	NA
M2.46.ST	46	control	FJI	Other	Middle	Other	BritoIL_2016	NA	male	NA
M2.48.ST	48	control	FJI	Other	Middle	Other	BritoIL_2016	NA	male	NA
M2.49.ST	49	control	FJI	Other	Middle	Other	BritoIL_2016	NA	male	NA
M2.50.ST	50	control	FJI	Other	Middle	Other	BritoIL_2016	NA	male	NA
M2.51.ST	51	control	FJI	Other	Middle	Other	BritoIL_2016	NA	male	NA
M2.52.ST	52	control	FJI	Other	Middle	Other	BritoIL_2016	NA	male	NA
M2.56.ST	56	control	FJI	Other	Middle	Other	BritoIL_2016	NA	male	NA
M2.57.ST	57	control	FJI	Other	Middle	Other	BritoIL_2016	NA	male	NA
M2.58.ST	58	control	FJI	Other	Middle	Other	BritoIL_2016	NA	male	NA
M2.60.ST	60	control	FJI	Other	Elderly	Other	BritoIL_2016	NA	male	NA
M2.63.ST	63	control	FJI	Other	Elderly	Other	BritoIL_2016	NA	male	NA
W1.20.ST	20	control	FJI	Other	Young	Other	BritoIL_2016	NA	female	NA
W1.21.ST	21	control	FJI	Other	Young	Other	BritoIL_2016	NA	female	NA
W1.22.ST	22	control	FJI	Other	Young	Other	BritoIL_2016	NA	female	NA
W1.26.ST	26	control	FJI	Other	Young	Other	BritoIL_2016	NA	female	NA
W1.27.ST	27	control	FJI	Other	Young	Other	BritoIL_2016	NA	female	NA
W1.31.ST	31	control	FJI	Other	Young	Other	BritoIL_2016	NA	female	NA
W1.33.ST	33	control	FJI	Other	Young	Other	BritoIL_2016	NA	female	NA
W1.34.ST	34	control	FJI	Other	Young	Other	BritoIL_2016	NA	female	NA
W1.36.ST	36	control	FJI	Other	Young	Other	BritoIL_2016	NA	female	NA
W1.37.ST	37	control	FJI	Other	Young	Other	BritoIL_2016	NA	female	NA
W1.38.ST	38	control	FJI	Other	Young	Other	BritoIL_2016	NA	female	NA
W1.39.ST	39	control	FJI	Other	Young	Other	BritoIL_2016	NA	female	NA
W1.40.ST	40	control	FJI	Other	Middle	Other	BritoIL_2016	NA	female	NA
W1.41.ST	41	control	FJI	Other	Middle	Other	BritoIL_2016	NA	female	NA
W1.42.ST	42	control	FJI	Other	Middle	Other	BritoIL_2016	NA	female	NA
W1.44.ST	44	control	FJI	Other	Middle	Other	BritoIL_2016	NA	female	NA
W1.51.ST	51	control	FJI	Other	Middle	Other	BritoIL_2016	NA	female	NA
W1.53.ST	53	control	FJI	Other	Middle	Other	BritoIL_2016	NA	female	NA
W1.54.ST	54	control	FJI	Other	Middle	Other	BritoIL_2016	NA	female	NA
W1.55.ST	55	control	FJI	Other	Middle	Other	BritoIL_2016	NA	female	NA
W2.21.ST	21	control	FJI	Other	Young	Other	BritoIL_2016	NA	female	NA
W2.23.ST	23	control	FJI	Other	Young	Other	BritoIL_2016	NA	female	NA
W2.25.ST	25	control	FJI	Other	Young	Other	BritoIL_2016	NA	female	NA
W2.26.ST	26	control	FJI	Other	Young	Other	BritoIL_2016	NA	female	NA
W2.33.ST	33	control	FJI	Other	Young	Other	BritoIL_2016	NA	female	NA
W2.34.ST	34	control	FJI	Other	Young	Other	BritoIL_2016	NA	female	NA
W2.35.ST	35	control	FJI	Other	Young	Other	BritoIL_2016	NA	female	NA
W2.36.ST	36	control	FJI	Other	Young	Other	BritoIL_2016	NA	female	NA
W2.39.ST	39	control	FJI	Other	Young	Other	BritoIL_2016	NA	female	NA
W2.40.ST	40	control	FJI	Other	Middle	Other	BritoIL_2016	NA	female	NA
W2.41.ST	41	control	FJI	Other	Middle	Other	BritoIL_2016	NA	female	NA
W2.42.ST	42	control	FJI	Other	Middle	Other	BritoIL_2016	NA	female	NA
W2.43.ST	43	control	FJI	Other	Middle	Other	BritoIL_2016	NA	female	NA
W2.44.ST	44	control	FJI	Other	Middle	Other	BritoIL_2016	NA	female	NA
W2.45.ST	45	control	FJI	Other	Middle	Other	BritoIL_2016	NA	female	NA
W2.46.ST	46	control	FJI	Other	Middle	Other	BritoIL_2016	NA	female	NA
W2.47.ST	47	control	FJI	Other	Middle	Other	BritoIL_2016	NA	female	NA
W2.48.ST	48	control	FJI	Other	Middle	Other	BritoIL_2016	NA	female	NA
W2.49.ST	49	control	FJI	Other	Middle	Other	BritoIL_2016	NA	female	NA
W2.52.ST	52	control	FJI	Other	Middle	Other	BritoIL_2016	NA	female	NA
W2.53.ST	53	control	FJI	Other	Middle	Other	BritoIL_2016	NA	female	NA
W2.54.ST	54	control	FJI	Other	Middle	Other	BritoIL_2016	NA	female	NA
W2.56.ST	56	control	FJI	Other	Middle	Other	BritoIL_2016	NA	female	NA
W2.59.ST	59	control	FJI	Other	Middle	Other	BritoIL_2016	NA	female	NA
W2.61.ST	61	control	FJI	Other	Elderly	Other	BritoIL_2016	NA	female	NA
W2.62.ST	62	control	FJI	Other	Elderly	Other	BritoIL_2016	NA	female	NA
W2.63.ST	63	control	FJI	Other	Elderly	Other	BritoIL_2016	NA	female	NA
W2.65.ST	65	control	FJI	Other	Elderly	Other	BritoIL_2016	NA	female	NA
W2.67.ST	67	control	FJI	Other	Elderly	Other	BritoIL_2016	NA	female	NA
W2.68.ST	68	control	FJI	Other	Elderly	Other	BritoIL_2016	NA	female	NA
W2.69.ST	69	control	FJI	Other	Elderly	Other	BritoIL_2016	NA	female	NA
W3.20.ST	20	control	FJI	Other	Young	Other	BritoIL_2016	NA	female	NA
W3.21.ST	21	control	FJI	Other	Young	Other	BritoIL_2016	NA	female	NA
W3.22.ST	22	control	FJI	Other	Young	Other	BritoIL_2016	NA	female	NA
W3.23.ST	23	control	FJI	Other	Young	Other	BritoIL_2016	NA	female	NA
WL.20.ST	20	control	FJI	Other	Young	Other	BritoIL_2016	NA	female	NA
WL.25.ST	25	control	FJI	Other	Young	Other	BritoIL_2016	NA	female	NA
WL.26.ST	26	control	FJI	Other	Young	Other	BritoIL_2016	NA	female	NA
WL.28.ST	28	control	FJI	Other	Young	Other	BritoIL_2016	NA	female	NA
WL.30.ST	30	control	FJI	Other	Young	Other	BritoIL_2016	NA	female	NA
WL.32.ST	32	control	FJI	Other	Young	Other	BritoIL_2016	NA	female	NA
WL.33.ST	33	control	FJI	Other	Young	Other	BritoIL_2016	NA	female	NA
WL.34.ST	34	control	FJI	Other	Young	Other	BritoIL_2016	NA	female	NA
WL.35.ST	35	control	FJI	Other	Young	Other	BritoIL_2016	NA	female	NA
WL.36.ST	36	control	FJI	Other	Young	Other	BritoIL_2016	NA	female	NA
WL.37.ST	37	control	FJI	Other	Young	Other	BritoIL_2016	NA	female	NA
WL.39.ST	39	control	FJI	Other	Young	Other	BritoIL_2016	NA	female	NA
WL.43.ST	43	control	FJI	Other	Middle	Other	BritoIL_2016	NA	female	NA
WL.44.ST	44	control	FJI	Other	Middle	Other	BritoIL_2016	NA	female	NA
WL.45.ST	45	control	FJI	Other	Middle	Other	BritoIL_2016	NA	female	NA
SID31766	73	control	AUT	EU	Elderly	EU	FengQ_2015	32	female	NA
SID31537	70	control	AUT	EU	Elderly	EU	FengQ_2015	31	female	NA
SID31428	69	control	AUT	EU	Elderly	EU	FengQ_2015	30	female	NA
SID530167	72	control	AUT	EU	Elderly	EU	FengQ_2015	30	female	NA
SID530315	75	control	AUT	EU	Elderly	EU	FengQ_2015	31	female	NA
SID530050	71	control	AUT	EU	Elderly	EU	FengQ_2015	29	female	NA
SID31160	67	control	AUT	EU	Elderly	EU	FengQ_2015	30	female	NA
SID530177	71	control	AUT	EU	Elderly	EU	FengQ_2015	29	female	NA
SID31700	72	control	AUT	EU	Elderly	EU	FengQ_2015	28.7	female	NA
SID31714	69	control	AUT	EU	Elderly	EU	FengQ_2015	28.3	female	NA
SID31219	74	control	AUT	EU	Elderly	EU	FengQ_2015	28.3	female	NA
SID31557	74	control	AUT	EU	Elderly	EU	FengQ_2015	28.5	female	NA
SID530154	74	control	AUT	EU	Elderly	EU	FengQ_2015	28.5	female	NA
SID530444	62	control	AUT	EU	Elderly	EU	FengQ_2015	22.1	female	NA
SID31021	60	control	AUT	EU	Elderly	EU	FengQ_2015	22.1	female	NA
SID530074	68	control	AUT	EU	Elderly	EU	FengQ_2015	22.1	female	NA
SID530227	68	control	AUT	EU	Elderly	EU	FengQ_2015	22.4	female	NA
SID530394	67	control	AUT	EU	Elderly	EU	FengQ_2015	22.58	female	NA
SID530295	70	control	AUT	EU	Elderly	EU	FengQ_2015	22.67	female	NA
SID530368	70	control	AUT	EU	Elderly	EU	FengQ_2015	22.8	female	NA
SID31300	68	control	AUT	EU	Elderly	EU	FengQ_2015	21.7	female	NA
SID31452	66	control	AUT	EU	Elderly	EU	FengQ_2015	21.7	female	NA
SID31723	69	control	AUT	EU	Elderly	EU	FengQ_2015	22.4	female	NA
SID531424	46	control	AUT	EU	Middle	EU	FengQ_2015	28.74	male	NA
SID31009	68	control	AUT	EU	Elderly	EU	FengQ_2015	32	male	NA
SID530251	72	control	AUT	EU	Elderly	EU	FengQ_2015	31.8	male	NA
SID31416	72	control	AUT	EU	Elderly	EU	FengQ_2015	31.8	male	NA
SID530119	70	control	AUT	EU	Elderly	EU	FengQ_2015	31.6	male	NA
SID31749	70	control	AUT	EU	Elderly	EU	FengQ_2015	31.25	male	NA
SID530364	63	control	AUT	EU	Elderly	EU	FengQ_2015	31.17	male	NA
SID31328	63	control	AUT	EU	Elderly	EU	FengQ_2015	30.9	male	NA
SID530163	63	control	AUT	EU	Elderly	EU	FengQ_2015	30.4	male	NA
SID31379	63	control	AUT	EU	Elderly	EU	FengQ_2015	30.4	male	NA
SID31112	66	control	AUT	EU	Elderly	EU	FengQ_2015	30.3	male	NA
SID31750	66	control	AUT	EU	Elderly	EU	FengQ_2015	34.04	male	NA
SID530451	68	control	AUT	EU	Elderly	EU	FengQ_2015	29.8	male	NA
SID31129	73	control	AUT	EU	Elderly	EU	FengQ_2015	29.7	male	NA
SID530052	64	control	AUT	EU	Elderly	EU	FengQ_2015	29.38	male	NA
SID31512	64	control	AUT	EU	Elderly	EU	FengQ_2015	29.3	male	NA
SID31236	65	control	AUT	EU	Elderly	EU	FengQ_2015	29.06	male	NA
SID31360	71	control	AUT	EU	Elderly	EU	FengQ_2015	29.04	male	NA
SID31343	72	control	AUT	EU	Elderly	EU	FengQ_2015	29.03	male	NA
SID530215	65	control	AUT	EU	Elderly	EU	FengQ_2015	31.22	male	NA
SID31519	65	control	AUT	EU	Elderly	EU	FengQ_2015	28.9	male	NA
SID31450	67	control	AUT	EU	Elderly	EU	FengQ_2015	23.14	male	NA
SID531414	46	control	AUT	EU	Middle	EU	FengQ_2015	23.15	male	NA
SID31071	68	control	AUT	EU	Elderly	EU	FengQ_2015	23.45	male	NA
SID530331	70	control	AUT	EU	Elderly	EU	FengQ_2015	23.67	male	NA
SID530258	65	control	AUT	EU	Elderly	EU	FengQ_2015	22.03	male	NA
SID31333	68	control	AUT	EU	Elderly	EU	FengQ_2015	22.2	male	NA
SID530055	64	control	AUT	EU	Elderly	EU	FengQ_2015	22.78	male	NA
SID31267	67	control	AUT	EU	Elderly	EU	FengQ_2015	22.79	male	NA
SID31711	66	control	AUT	EU	Elderly	EU	FengQ_2015	30.02	male	NA
SID530075	63	control	AUT	EU	Elderly	EU	FengQ_2015	34.14	male	NA
SID31637	66	control	AUT	EU	Elderly	EU	FengQ_2015	29.98	male	NA
SID31398	68	adenoma	AUT	EU	Elderly	EU	FengQ_2015	34.01	female	NA
SID531403	59	adenoma	AUT	EU	Middle	EU	FengQ_2015	29.2	female	NA
SID530168	62	adenoma	AUT	EU	Elderly	EU	FengQ_2015	32.8	female	NA
SID530185	52	adenoma	AUT	EU	Middle	EU	FengQ_2015	32.8	female	NA
SID530600	70	adenoma	AUT	EU	Elderly	EU	FengQ_2015	25.2	female	NA
SID31477	78	adenoma	AUT	EU	Elderly	EU	FengQ_2015	31.24	female	NA
SID530403	75	adenoma	AUT	EU	Elderly	EU	FengQ_2015	30.12	female	NA
SID530002	60	adenoma	AUT	EU	Elderly	EU	FengQ_2015	30	female	NA
SID530697	63	adenoma	AUT	EU	Elderly	EU	FengQ_2015	30.47	female	NA
SID31455	72	adenoma	AUT	EU	Elderly	EU	FengQ_2015	27.43	female	NA
SID530756	70	adenoma	AUT	EU	Elderly	EU	FengQ_2015	29.38	female	NA
SID31424	68	adenoma	AUT	EU	Elderly	EU	FengQ_2015	24.84	female	NA
SID31501	69	adenoma	AUT	EU	Elderly	EU	FengQ_2015	24.4	female	NA
SID31256	69	adenoma	AUT	EU	Elderly	EU	FengQ_2015	24.13	female	NA
SID530297	78	adenoma	AUT	EU	Elderly	EU	FengQ_2015	24	female	NA
SID530142	61	adenoma	AUT	EU	Elderly	EU	FengQ_2015	22.8	female	NA
SID530026	83	adenoma	AUT	EU	Elderly	EU	FengQ_2015	21.94	female	NA
SID530558	56	adenoma	AUT	EU	Middle	EU	FengQ_2015	22.8	female	NA
SID530054	64	adenoma	AUT	EU	Elderly	EU	FengQ_2015	20.52	female	NA
SID530743	66	adenoma	AUT	EU	Elderly	EU	FengQ_2015	22.65	female	NA
SID530867	58	adenoma	AUT	EU	Middle	EU	FengQ_2015	27.02	male	NA
SID530705	77	adenoma	AUT	EU	Elderly	EU	FengQ_2015	37.56	male	NA
SID31337	62	adenoma	AUT	EU	Elderly	EU	FengQ_2015	35.43	male	NA
SID31030	70	adenoma	AUT	EU	Elderly	EU	FengQ_2015	34.11	male	NA
SID31282	63	adenoma	AUT	EU	Elderly	EU	FengQ_2015	34.08	male	NA
SID530028	67	adenoma	AUT	EU	Elderly	EU	FengQ_2015	33.23	male	NA
SID31449	63	adenoma	AUT	EU	Elderly	EU	FengQ_2015	30.77	male	NA
SID31275	62	adenoma	AUT	EU	Elderly	EU	FengQ_2015	30.1	male	NA
SID530018	56	adenoma	AUT	EU	Middle	EU	FengQ_2015	29.41	male	NA
SID530262	64	adenoma	AUT	EU	Elderly	EU	FengQ_2015	29.3	male	NA
SID530039	67	adenoma	AUT	EU	Elderly	EU	FengQ_2015	28.34	male	NA
SID530172	63	adenoma	AUT	EU	Elderly	EU	FengQ_2015	27.4	male	NA
SID31137	67	adenoma	AUT	EU	Elderly	EU	FengQ_2015	27.14	male	NA
SID31431	71	adenoma	AUT	EU	Elderly	EU	FengQ_2015	27.04	male	NA
SID31233	62	adenoma	AUT	EU	Elderly	EU	FengQ_2015	26.88	male	NA
SID530398	80	adenoma	AUT	EU	Elderly	EU	FengQ_2015	26.47	male	NA
SID31582	77	adenoma	AUT	EU	Elderly	EU	FengQ_2015	25.7	male	NA
SID530450	48	adenoma	AUT	EU	Middle	EU	FengQ_2015	25.61	male	NA
SID530623	62	adenoma	AUT	EU	Elderly	EU	FengQ_2015	24.3	male	NA
SID530323	71	adenoma	AUT	EU	Elderly	EU	FengQ_2015	24.8	male	NA
SID530348	58	adenoma	AUT	EU	Middle	EU	FengQ_2015	21.7	male	NA
SID530041	69	adenoma	AUT	EU	Elderly	EU	FengQ_2015	21.46	male	NA
SID31705	84	adenoma	AUT	EU	Elderly	EU	FengQ_2015	24.7	female	NA
SID530840	74	adenoma	AUT	EU	Elderly	EU	FengQ_2015	24.13	female	NA
SID31446	84	CRC	AUT	EU	Elderly	EU	FengQ_2015	31.22	female	NA
SID31881	60	CRC	AUT	EU	Elderly	EU	FengQ_2015	30.08	female	NA
SID31866	73	CRC	AUT	EU	Elderly	EU	FengQ_2015	29.75	female	NA
SID31874	74	CRC	AUT	EU	Elderly	EU	FengQ_2015	29.17	female	NA
SID31549	84	CRC	AUT	EU	Elderly	EU	FengQ_2015	27.77	female	NA
SID31878	52	CRC	AUT	EU	Middle	EU	FengQ_2015	27.14	female	NA
SID531281	72	CRC	AUT	EU	Elderly	EU	FengQ_2015	27.12	female	NA
SID31877	72	CRC	AUT	EU	Elderly	EU	FengQ_2015	26.67	female	NA
SID530373	47	CRC	AUT	EU	Middle	EU	FengQ_2015	25.78	female	NA
SID531155	72	CRC	AUT	EU	Elderly	EU	FengQ_2015	24.22	female	NA
SID31868	64	CRC	AUT	EU	Elderly	EU	FengQ_2015	24.09	female	NA
SID531361	72	CRC	AUT	EU	Elderly	EU	FengQ_2015	23.83	female	NA
SID531775	77	CRC	AUT	EU	Elderly	EU	FengQ_2015	23.5	female	NA
SID31865	55	CRC	AUT	EU	Middle	EU	FengQ_2015	23.34	female	NA
SID31223	65	CRC	AUT	EU	Elderly	EU	FengQ_2015	23.31	female	NA
SID531469	45	CRC	AUT	EU	Middle	EU	FengQ_2015	22.15	female	NA
SID31876	56	CRC	AUT	EU	Middle	EU	FengQ_2015	20.07	female	NA
SID531416	63	CRC	AUT	EU	Elderly	EU	FengQ_2015	33.56	male	NA
SID31872	46	CRC	AUT	EU	Middle	EU	FengQ_2015	30.86	male	NA
SID31276	82	CRC	AUT	EU	Elderly	EU	FengQ_2015	30.47	male	NA
SID531333	69	CRC	AUT	EU	Elderly	EU	FengQ_2015	29.94	male	NA
SID531382	65	CRC	AUT	EU	Elderly	EU	FengQ_2015	29.74	male	NA
SID530890	77	CRC	AUT	EU	Elderly	EU	FengQ_2015	29.41	male	NA
SID31237	67	CRC	AUT	EU	Elderly	EU	FengQ_2015	29.4	male	NA
SID31004	64	CRC	AUT	EU	Elderly	EU	FengQ_2015	29.35	male	NA
SID531277	64	CRC	AUT	EU	Elderly	EU	FengQ_2015	29.07	male	NA
SID31871	72	CRC	AUT	EU	Elderly	EU	FengQ_2015	28.41	male	NA
SID31188	65	CRC	AUT	EU	Elderly	EU	FengQ_2015	28.03	male	NA
SID31875	58	CRC	AUT	EU	Middle	EU	FengQ_2015	27.76	male	NA
SID31884	54	CRC	AUT	EU	Middle	EU	FengQ_2015	27.34	male	NA
SID31285	84	CRC	AUT	EU	Elderly	EU	FengQ_2015	27.28	male	NA
SID31489	60	CRC	AUT	EU	Elderly	EU	FengQ_2015	26.64	male	NA
SID31685	74	CRC	AUT	EU	Elderly	EU	FengQ_2015	26.37	male	NA
SID531248	79	CRC	AUT	EU	Elderly	EU	FengQ_2015	26.3	male	NA
SID31870	63	CRC	AUT	EU	Elderly	EU	FengQ_2015	25.88	male	NA
SID531128	52	CRC	AUT	EU	Middle	EU	FengQ_2015	25.73	male	NA
SID31873	73	CRC	AUT	EU	Elderly	EU	FengQ_2015	24.82	male	NA
SID31880	74	CRC	AUT	EU	Elderly	EU	FengQ_2015	24.34	male	NA
SID531766	72	CRC	AUT	EU	Elderly	EU	FengQ_2015	24.34	male	NA
SID31883	43	CRC	AUT	EU	Middle	EU	FengQ_2015	22.68	male	NA
SID531352	66	CRC	AUT	EU	Elderly	EU	FengQ_2015	22.6	male	NA
SID31367	86	CRC	AUT	EU	Elderly	EU	FengQ_2015	20.5	female	NA
SID31493	68	CRC	AUT	EU	Elderly	EU	FengQ_2015	32.25	male	NA
SID31879	71	CRC	AUT	EU	Elderly	EU	FengQ_2015	29.74	male	NA
SID531274	77	CRC	AUT	EU	Elderly	EU	FengQ_2015	19.16	male	NA
SID31159	73	CRC	AUT	EU	Elderly	EU	FengQ_2015	17.99	male	NA
SID532749	55	control	AUT	EU	Middle	EU	FengQ_2015	27.76	male	NA
SID532779	70	control	AUT	EU	Elderly	EU	FengQ_2015	28.72	male	NA
SID532796	73	control	AUT	EU	Elderly	EU	FengQ_2015	26.56	female	NA
SID532802	68	control	AUT	EU	Elderly	EU	FengQ_2015	23.53	male	NA
SID532826	78	control	AUT	EU	Elderly	EU	FengQ_2015	31.22	male	NA
SID532832	68	adenoma	AUT	EU	Elderly	EU	FengQ_2015	27.55	female	NA
SID532305	56	adenoma	AUT	EU	Middle	EU	FengQ_2015	43.58	female	NA
SID532915	43	control	AUT	EU	Middle	EU	FengQ_2015	22.65	female	NA
SID531663	63	adenoma	AUT	EU	Elderly	EU	FengQ_2015	25.65	male	NA
SRS016335	20	control	USA	NorthAmerica	Young	NorthAmerica	HMP_2012	NA	male	NA
SRS011061	30	control	USA	NorthAmerica	Young	NorthAmerica	HMP_2012	NA	female	NA
SRS016267	29	control	USA	NorthAmerica	Young	NorthAmerica	HMP_2012	NA	male	NA
SRS053214	23	control	USA	NorthAmerica	Young	NorthAmerica	HMP_2012	NA	female	NA
SRS013521	22	control	USA	NorthAmerica	Young	NorthAmerica	HMP_2012	NA	female	NA
SRS018817	27	control	USA	NorthAmerica	Young	NorthAmerica	HMP_2012	NA	male	NA
SRS017247	26	control	USA	NorthAmerica	Young	NorthAmerica	HMP_2012	NA	male	NA
SRS019968	24	control	USA	NorthAmerica	Young	NorthAmerica	HMP_2012	NA	female	NA
SRS064557	27	control	USA	NorthAmerica	Young	NorthAmerica	HMP_2012	NA	female	NA
SRS043001	27	control	USA	NorthAmerica	Young	NorthAmerica	HMP_2012	NA	female	NA
SRS019582	37	control	USA	NorthAmerica	Young	NorthAmerica	HMP_2012	NA	male	NA
SRS024388	27	control	USA	NorthAmerica	Young	NorthAmerica	HMP_2012	NA	female	NA
SRS013951	33	control	USA	NorthAmerica	Young	NorthAmerica	HMP_2012	NA	male	NA
SRS020869	31	control	USA	NorthAmerica	Young	NorthAmerica	HMP_2012	NA	male	NA
SRS021948	27	control	USA	NorthAmerica	Young	NorthAmerica	HMP_2012	NA	female	NA
SRS064276	38	control	USA	NorthAmerica	Young	NorthAmerica	HMP_2012	NA	female	NA
SRS022071	22	control	USA	NorthAmerica	Young	NorthAmerica	HMP_2012	NA	female	NA
SRS053335	24	control	USA	NorthAmerica	Young	NorthAmerica	HMP_2012	NA	female	NA
SRS024625	23	control	USA	NorthAmerica	Young	NorthAmerica	HMP_2012	NA	male	NA
SRS049959	39	control	USA	NorthAmerica	Young	NorthAmerica	HMP_2012	NA	male	NA
SRS013687	27	control	USA	NorthAmerica	Young	NorthAmerica	HMP_2012	NA	male	NA
SRS011084	28	control	USA	NorthAmerica	Young	NorthAmerica	HMP_2012	NA	male	NA
SRS023583	20	control	USA	NorthAmerica	Young	NorthAmerica	HMP_2012	NA	female	NA
SRS022137	27	control	USA	NorthAmerica	Young	NorthAmerica	HMP_2012	NA	female	NA
SRS021484	28	control	USA	NorthAmerica	Young	NorthAmerica	HMP_2012	NA	male	NA
SRS024265	24	control	USA	NorthAmerica	Young	NorthAmerica	HMP_2012	NA	female	NA
SRS024009	27	control	USA	NorthAmerica	Young	NorthAmerica	HMP_2012	NA	female	NA
SRS019910	23	control	USA	NorthAmerica	Young	NorthAmerica	HMP_2012	NA	male	NA
SRS015217	26	control	USA	NorthAmerica	Young	NorthAmerica	HMP_2012	NA	female	NA
SRS049712	27	control	USA	NorthAmerica	Young	NorthAmerica	HMP_2012	NA	male	NA
SRS019787	29	control	USA	NorthAmerica	Young	NorthAmerica	HMP_2012	NA	male	NA
SRS011134	25	control	USA	NorthAmerica	Young	NorthAmerica	HMP_2012	NA	male	NA
SRS058770	26	control	USA	NorthAmerica	Young	NorthAmerica	HMP_2012	NA	male	NA
SRS055982	27	control	USA	NorthAmerica	Young	NorthAmerica	HMP_2012	NA	female	NA
SRS053398	23	control	USA	NorthAmerica	Young	NorthAmerica	HMP_2012	NA	female	NA
SRS016203	23	control	USA	NorthAmerica	Young	NorthAmerica	HMP_2012	NA	female	NA
SRS065504	20	control	USA	NorthAmerica	Young	NorthAmerica	HMP_2012	NA	female	NA
SRS017103	26	control	USA	NorthAmerica	Young	NorthAmerica	HMP_2012	NA	male	NA
SRS018313	23	control	USA	NorthAmerica	Young	NorthAmerica	HMP_2012	NA	male	NA
SRS011586	24	control	USA	NorthAmerica	Young	NorthAmerica	HMP_2012	NA	female	NA
SRS016585	31	control	USA	NorthAmerica	Young	NorthAmerica	HMP_2012	NA	female	NA
SRS015264	37	control	USA	NorthAmerica	Young	NorthAmerica	HMP_2012	NA	male	NA
SRS043701	29	control	USA	NorthAmerica	Young	NorthAmerica	HMP_2012	NA	male	NA
SRS013158	22	control	USA	NorthAmerica	Young	NorthAmerica	HMP_2012	NA	male	NA
SRS050925	33	control	USA	NorthAmerica	Young	NorthAmerica	HMP_2012	NA	male	NA
SRS016753	21	control	USA	NorthAmerica	Young	NorthAmerica	HMP_2012	NA	male	NA
SRS048870	23	control	USA	NorthAmerica	Young	NorthAmerica	HMP_2012	NA	female	NA
SRS012273	22	control	USA	NorthAmerica	Young	NorthAmerica	HMP_2012	NA	female	NA
SRS024435	38	control	USA	NorthAmerica	Young	NorthAmerica	HMP_2012	NA	male	NA
SRS047014	20	control	USA	NorthAmerica	Young	NorthAmerica	HMP_2012	NA	male	NA
SRS020328	32	control	USA	NorthAmerica	Young	NorthAmerica	HMP_2012	NA	female	NA
SRS050752	39	control	USA	NorthAmerica	Young	NorthAmerica	HMP_2012	NA	female	NA
SRS052697	36	control	USA	NorthAmerica	Young	NorthAmerica	HMP_2012	NA	female	NA
SRS051882	26	control	USA	NorthAmerica	Young	NorthAmerica	HMP_2012	NA	female	NA
SRS045645	29	control	USA	NorthAmerica	Young	NorthAmerica	HMP_2012	NA	male	NA
SRS057717	38	control	USA	NorthAmerica	Young	NorthAmerica	HMP_2012	NA	female	NA
SRS011271	27	control	USA	NorthAmerica	Young	NorthAmerica	HMP_2012	NA	male	NA
SRS024132	27	control	USA	NorthAmerica	Young	NorthAmerica	HMP_2012	NA	male	NA
SRS014287	35	control	USA	NorthAmerica	Young	NorthAmerica	HMP_2012	NA	male	NA
SRS014313	25	control	USA	NorthAmerica	Young	NorthAmerica	HMP_2012	NA	female	NA
SRS018133	26	control	USA	NorthAmerica	Young	NorthAmerica	HMP_2012	NA	male	NA
SRS015960	22	control	USA	NorthAmerica	Young	NorthAmerica	HMP_2012	NA	male	NA
SRS016495	23	control	USA	NorthAmerica	Young	NorthAmerica	HMP_2012	NA	female	NA
SRS015369	27	control	USA	NorthAmerica	Young	NorthAmerica	HMP_2012	NA	female	NA
SRS023971	22	control	USA	NorthAmerica	Young	NorthAmerica	HMP_2012	NA	male	NA
SRS047044	26	control	USA	NorthAmerica	Young	NorthAmerica	HMP_2012	NA	male	NA
SRS013215	27	control	USA	NorthAmerica	Young	NorthAmerica	HMP_2012	NA	male	NA
SRS024549	27	control	USA	NorthAmerica	Young	NorthAmerica	HMP_2012	NA	male	NA
SRS024075	26	control	USA	NorthAmerica	Young	NorthAmerica	HMP_2012	NA	male	NA
SRS016018	27	control	USA	NorthAmerica	Young	NorthAmerica	HMP_2012	NA	male	NA
SRS022524	26	control	USA	NorthAmerica	Young	NorthAmerica	HMP_2012	NA	female	NA
SRS015854	39	control	USA	NorthAmerica	Young	NorthAmerica	HMP_2012	NA	male	NA
SRS015133	28	control	USA	NorthAmerica	Young	NorthAmerica	HMP_2012	NA	female	NA
SRS011405	27	control	USA	NorthAmerica	Young	NorthAmerica	HMP_2012	NA	female	NA
SRS063040	26	control	USA	NorthAmerica	Young	NorthAmerica	HMP_2012	NA	female	NA
SRS022713	22	control	USA	NorthAmerica	Young	NorthAmerica	HMP_2012	NA	female	NA
SRS017701	30	control	USA	NorthAmerica	Young	NorthAmerica	HMP_2012	NA	female	NA
SRS023829	29	control	USA	NorthAmerica	Young	NorthAmerica	HMP_2012	NA	female	NA
SRS023914	27	control	USA	NorthAmerica	Young	NorthAmerica	HMP_2012	NA	male	NA
SRS014459	28	control	USA	NorthAmerica	Young	NorthAmerica	HMP_2012	NA	female	NA
SRS018656	21	control	USA	NorthAmerica	Young	NorthAmerica	HMP_2012	NA	female	NA
SRS018427	25	control	USA	NorthAmerica	Young	NorthAmerica	HMP_2012	NA	male	NA
SRS015190	23	control	USA	NorthAmerica	Young	NorthAmerica	HMP_2012	NA	female	NA
SRS011302	24	control	USA	NorthAmerica	Young	NorthAmerica	HMP_2012	NA	female	NA
SRS058723	25	control	USA	NorthAmerica	Young	NorthAmerica	HMP_2012	NA	female	NA
SRS056259	22	control	USA	NorthAmerica	Young	NorthAmerica	HMP_2012	NA	male	NA
SRS012902	29	control	USA	NorthAmerica	Young	NorthAmerica	HMP_2012	NA	female	NA
SRS014235	25	control	USA	NorthAmerica	Young	NorthAmerica	HMP_2012	NA	male	NA
SRS018351	24	control	USA	NorthAmerica	Young	NorthAmerica	HMP_2012	NA	male	NA
SRS019397	21	control	USA	NorthAmerica	Young	NorthAmerica	HMP_2012	NA	male	NA
SRS011452	28	control	USA	NorthAmerica	Young	NorthAmerica	HMP_2012	NA	male	NA
SRS052027	28	control	USA	NorthAmerica	Young	NorthAmerica	HMP_2012	NA	male	NA
SRS051031	26	control	USA	NorthAmerica	Young	NorthAmerica	HMP_2012	NA	male	NA
SRS063985	28	control	USA	NorthAmerica	Young	NorthAmerica	HMP_2012	NA	female	NA
SRS075398	29	control	USA	NorthAmerica	Young	NorthAmerica	HMP_2012	NA	female	NA
SRS014979	20	control	USA	NorthAmerica	Young	NorthAmerica	HMP_2012	NA	female	NA
SRS016095	21	control	USA	NorthAmerica	Young	NorthAmerica	HMP_2012	NA	female	NA
SRS050422	35	control	USA	NorthAmerica	Young	NorthAmerica	HMP_2012	NA	male	NA
SRS045713	25	control	USA	NorthAmerica	Young	NorthAmerica	HMP_2012	NA	male	NA
SRS015663	26	control	USA	NorthAmerica	Young	NorthAmerica	HMP_2012	NA	male	NA
SRS042284	21	control	USA	NorthAmerica	Young	NorthAmerica	HMP_2012	NA	female	NA
SRS015794	21	control	USA	NorthAmerica	Young	NorthAmerica	HMP_2012	NA	male	NA
SRS014613	38	control	USA	NorthAmerica	Young	NorthAmerica	HMP_2012	NA	female	NA
SRS014683	23	control	USA	NorthAmerica	Young	NorthAmerica	HMP_2012	NA	male	NA
SRS019030	23	control	USA	NorthAmerica	Young	NorthAmerica	HMP_2012	NA	male	NA
SRS020233	24	control	USA	NorthAmerica	Young	NorthAmerica	HMP_2012	NA	male	NA
SRS017521	26	control	USA	NorthAmerica	Young	NorthAmerica	HMP_2012	NA	female	NA
SRS017821	29	control	USA	NorthAmerica	Young	NorthAmerica	HMP_2012	NA	male	NA
SRS023526	27	control	USA	NorthAmerica	Young	NorthAmerica	HMP_2012	NA	male	NA
SRS023346	38	control	USA	NorthAmerica	Young	NorthAmerica	HMP_2012	NA	female	NA
SRS042628	27	control	USA	NorthAmerica	Young	NorthAmerica	HMP_2012	NA	male	NA
SRS014923	33	control	USA	NorthAmerica	Young	NorthAmerica	HMP_2012	NA	male	NA
SRS049995	22	control	USA	NorthAmerica	Young	NorthAmerica	HMP_2012	NA	female	NA
SRS011239	27	control	USA	NorthAmerica	Young	NorthAmerica	HMP_2012	NA	female	NA
SRS019601	21	control	USA	NorthAmerica	Young	NorthAmerica	HMP_2012	NA	female	NA
SRS013800	38	control	USA	NorthAmerica	Young	NorthAmerica	HMP_2012	NA	male	NA
SRS015782	26	control	USA	NorthAmerica	Young	NorthAmerica	HMP_2012	NA	male	NA
SRS024331	26	control	USA	NorthAmerica	Young	NorthAmerica	HMP_2012	NA	male	NA
SRS045004	29	control	USA	NorthAmerica	Young	NorthAmerica	HMP_2012	NA	male	NA
SRS049164	20	control	USA	NorthAmerica	Young	NorthAmerica	HMP_2012	NA	male	NA
SRS043411	23	control	USA	NorthAmerica	Young	NorthAmerica	HMP_2012	NA	female	NA
SRS048164	21	control	USA	NorthAmerica	Young	NorthAmerica	HMP_2012	NA	male	NA
SRS016056	21	control	USA	NorthAmerica	Young	NorthAmerica	HMP_2012	NA	male	NA
SRS019161	33	control	USA	NorthAmerica	Young	NorthAmerica	HMP_2012	NA	male	NA
SRS049900	28	control	USA	NorthAmerica	Young	NorthAmerica	HMP_2012	NA	male	NA
SRS016989	28	control	USA	NorthAmerica	Young	NorthAmerica	HMP_2012	NA	male	NA
SRS062427	35	control	USA	NorthAmerica	Young	NorthAmerica	HMP_2012	NA	male	NA
SRS019267	27	control	USA	NorthAmerica	Young	NorthAmerica	HMP_2012	NA	female	NA
SRS064645	28	control	USA	NorthAmerica	Young	NorthAmerica	HMP_2012	NA	male	NA
SRS019685	25	control	USA	NorthAmerica	Young	NorthAmerica	HMP_2012	NA	male	NA
SRS013476	27	control	USA	NorthAmerica	Young	NorthAmerica	HMP_2012	NA	male	NA
SRS011529	23	control	USA	NorthAmerica	Young	NorthAmerica	HMP_2012	NA	male	NA
SRS077730	23	control	USA	NorthAmerica	Young	NorthAmerica	HMP_2012	NA	female	NA
SRS015065	28	control	USA	NorthAmerica	Young	NorthAmerica	HMP_2012	NA	female	NA
SRS017307	27	control	USA	NorthAmerica	Young	NorthAmerica	HMP_2012	NA	male	NA
SRS017191	29	control	USA	NorthAmerica	Young	NorthAmerica	HMP_2012	NA	male	NA
SRS016954	23	control	USA	NorthAmerica	Young	NorthAmerica	HMP_2012	NA	male	NA
SRS057478	22	control	USA	NorthAmerica	Young	NorthAmerica	HMP_2012	NA	female	NA
SRS078176	22	control	USA	NorthAmerica	Young	NorthAmerica	HMP_2012	NA	female	NA
SRS050299	37	control	USA	NorthAmerica	Young	NorthAmerica	HMP_2012	NA	male	NA
SRS022609	25	control	USA	NorthAmerica	Young	NorthAmerica	HMP_2012	NA	male	NA
S51	69	IGT	SWE	NorthEU	Elderly	EU	KarlssonFH_2013	NA	female	1
S53	70	control	SWE	NorthEU	Elderly	EU	KarlssonFH_2013	NA	female	1
S54	69	IGT	SWE	NorthEU	Elderly	EU	KarlssonFH_2013	NA	female	1
S58	70	control	ISL	EU	Elderly	EU	KarlssonFH_2013	NA	female	1
S59	69	control	SWE	NorthEU	Elderly	EU	KarlssonFH_2013	NA	female	1
S60	69	IGT	SWE	NorthEU	Elderly	EU	KarlssonFH_2013	NA	female	1
S77	69	control	SWE	NorthEU	Elderly	EU	KarlssonFH_2013	NA	female	1
S80	70	control	SWE	NorthEU	Elderly	EU	KarlssonFH_2013	NA	female	1
S88	69	control	SWE	NorthEU	Elderly	EU	KarlssonFH_2013	NA	female	1
S92	69	control	SWE	NorthEU	Elderly	EU	KarlssonFH_2013	NA	female	1
S112	69	IGT	SWE	NorthEU	Elderly	EU	KarlssonFH_2013	NA	female	1
S118	70	control	SWE	NorthEU	Elderly	EU	KarlssonFH_2013	NA	female	1
S121	69	control	SWE	NorthEU	Elderly	EU	KarlssonFH_2013	NA	female	1
S126	69	control	DEU	EU	Elderly	EU	KarlssonFH_2013	NA	female	1
S127	70	control	SWE	NorthEU	Elderly	EU	KarlssonFH_2013	NA	female	1
S131	69	IGT	SWE	NorthEU	Elderly	EU	KarlssonFH_2013	NA	female	1
S137	70	control	SWE	NorthEU	Elderly	EU	KarlssonFH_2013	NA	female	1
S141	69	control	SWE	NorthEU	Elderly	EU	KarlssonFH_2013	NA	female	1
S143	69	control	SWE	NorthEU	Elderly	EU	KarlssonFH_2013	NA	female	1
S144	69	IGT	SWE	NorthEU	Elderly	EU	KarlssonFH_2013	NA	female	1
S146	69	control	SWE	NorthEU	Elderly	EU	KarlssonFH_2013	NA	female	1
S153	70	control	DEU	EU	Elderly	EU	KarlssonFH_2013	NA	female	1
S155	70	control	FRA	EU	Elderly	EU	KarlssonFH_2013	NA	female	1
S158	68	T2D	SWE	NorthEU	Elderly	EU	KarlssonFH_2013	NA	female	1
S186	70	IGT	SWE	NorthEU	Elderly	EU	KarlssonFH_2013	NA	female	1
S187	70	control	SWE	NorthEU	Elderly	EU	KarlssonFH_2013	NA	female	1
S193	70	control	SWE	NorthEU	Elderly	EU	KarlssonFH_2013	NA	female	1
S194	70	control	SWE	NorthEU	Elderly	EU	KarlssonFH_2013	NA	female	1
S195	71	control	SWE	NorthEU	Elderly	EU	KarlssonFH_2013	NA	female	1
S198	69	control	SWE	NorthEU	Elderly	EU	KarlssonFH_2013	NA	female	1
S200	69	IGT	SWE	NorthEU	Elderly	EU	KarlssonFH_2013	NA	female	1
S205	70	T2D	SWE	NorthEU	Elderly	EU	KarlssonFH_2013	NA	female	1
S224	69	control	SWE	NorthEU	Elderly	EU	KarlssonFH_2013	NA	female	1
S225	70	control	SWE	NorthEU	Elderly	EU	KarlssonFH_2013	NA	female	1
S227	69	IGT	SWE	NorthEU	Elderly	EU	KarlssonFH_2013	NA	female	1
S229	69	IGT	SWE	NorthEU	Elderly	EU	KarlssonFH_2013	NA	female	1
S231	70	control	SWE	NorthEU	Elderly	EU	KarlssonFH_2013	NA	female	1
S235	69	T2D	DEU	EU	Elderly	EU	KarlssonFH_2013	NA	female	1
S239	71	IGT	SWE	NorthEU	Elderly	EU	KarlssonFH_2013	NA	female	1
S243	70	IGT	SWE	NorthEU	Elderly	EU	KarlssonFH_2013	NA	female	1
S244	69	T2D	SWE	NorthEU	Elderly	EU	KarlssonFH_2013	NA	female	1
S248	69	T2D	SWE	NorthEU	Elderly	EU	KarlssonFH_2013	NA	female	1
S249	70	IGT	SWE	NorthEU	Elderly	EU	KarlssonFH_2013	NA	female	1
S258	69	T2D	SWE	NorthEU	Elderly	EU	KarlssonFH_2013	NA	female	1
S263	69	T2D	SWE	NorthEU	Elderly	EU	KarlssonFH_2013	NA	female	1
S264	69	control	SWE	NorthEU	Elderly	EU	KarlssonFH_2013	NA	female	1
S268	69	control	SWE	NorthEU	Elderly	EU	KarlssonFH_2013	NA	female	1
S269	70	control	SWE	NorthEU	Elderly	EU	KarlssonFH_2013	NA	female	1
S278	70	IGT	NOR	NorthEU	Elderly	EU	KarlssonFH_2013	NA	female	1
S286	69	T2D	DNK	NorthEU	Elderly	EU	KarlssonFH_2013	NA	female	1
S288	70	control	SWE	NorthEU	Elderly	EU	KarlssonFH_2013	NA	female	1
S290	70	IGT	SWE	NorthEU	Elderly	EU	KarlssonFH_2013	NA	female	1
S297	69	T2D	SWE	NorthEU	Elderly	EU	KarlssonFH_2013	NA	female	1
S299	70	IGT	SWE	NorthEU	Elderly	EU	KarlssonFH_2013	NA	female	1
S304	70	IGT	SWE	NorthEU	Elderly	EU	KarlssonFH_2013	NA	female	1
S305	70	IGT	SWE	NorthEU	Elderly	EU	KarlssonFH_2013	NA	female	1
S312	70	IGT	SWE	NorthEU	Elderly	EU	KarlssonFH_2013	NA	female	1
S317	70	IGT	SWE	NorthEU	Elderly	EU	KarlssonFH_2013	NA	female	1
S327	70	IGT	SWE	NorthEU	Elderly	EU	KarlssonFH_2013	NA	female	1
S330	70	IGT	SWE	NorthEU	Elderly	EU	KarlssonFH_2013	NA	female	1
S332	71	IGT	SWE	NorthEU	Elderly	EU	KarlssonFH_2013	NA	female	1
S334	70	T2D	SWE	NorthEU	Elderly	EU	KarlssonFH_2013	NA	female	1
S342	70	IGT	SWE	NorthEU	Elderly	EU	KarlssonFH_2013	NA	female	1
S344	70	T2D	SWE	NorthEU	Elderly	EU	KarlssonFH_2013	NA	female	1
S347	71	IGT	SWE	NorthEU	Elderly	EU	KarlssonFH_2013	NA	female	1
S349	70	IGT	SWE	NorthEU	Elderly	EU	KarlssonFH_2013	NA	female	1
S350	70	IGT	SWE	NorthEU	Elderly	EU	KarlssonFH_2013	NA	female	1
S353	69	T2D	SWE	NorthEU	Elderly	EU	KarlssonFH_2013	NA	female	1
S354	70	IGT	SVK	EU	Elderly	EU	KarlssonFH_2013	NA	female	1
S356	70	IGT	SWE	NorthEU	Elderly	EU	KarlssonFH_2013	NA	female	1
S365	71	control	SWE	NorthEU	Elderly	EU	KarlssonFH_2013	NA	female	1
S367	70	IGT	SVK	EU	Elderly	EU	KarlssonFH_2013	NA	female	1
S370	70	T2D	SWE	NorthEU	Elderly	EU	KarlssonFH_2013	NA	female	1
S372	71	IGT	SWE	NorthEU	Elderly	EU	KarlssonFH_2013	NA	female	1
S378	71	T2D	SWE	NorthEU	Elderly	EU	KarlssonFH_2013	NA	female	1
S380	71	T2D	SWE	NorthEU	Elderly	EU	KarlssonFH_2013	NA	female	1
S381	70	control	SWE	NorthEU	Elderly	EU	KarlssonFH_2013	NA	female	1
S384	71	IGT	SWE	NorthEU	Elderly	EU	KarlssonFH_2013	NA	female	1
S389	69	T2D	SWE	NorthEU	Elderly	EU	KarlssonFH_2013	NA	female	1
S393	70	IGT	SWE	NorthEU	Elderly	EU	KarlssonFH_2013	NA	female	1
S395	70	IGT	SWE	NorthEU	Elderly	EU	KarlssonFH_2013	NA	female	1
S397	71	IGT	SWE	NorthEU	Elderly	EU	KarlssonFH_2013	NA	female	1
S398	70	T2D	SWE	NorthEU	Elderly	EU	KarlssonFH_2013	NA	female	1
S420	69	IGT	SWE	NorthEU	Elderly	EU	KarlssonFH_2013	NA	female	1
S421	70	T2D	SWE	NorthEU	Elderly	EU	KarlssonFH_2013	NA	female	1
S422	71	T2D	SWE	NorthEU	Elderly	EU	KarlssonFH_2013	NA	female	1
S424	70	control	SWE	NorthEU	Elderly	EU	KarlssonFH_2013	NA	female	1
S432	71	IGT	SWE	NorthEU	Elderly	EU	KarlssonFH_2013	NA	female	1
S434	69	T2D	SWE	NorthEU	Elderly	EU	KarlssonFH_2013	NA	female	1
S436	71	T2D	SWE	NorthEU	Elderly	EU	KarlssonFH_2013	NA	female	1
S439	70	T2D	SWE	NorthEU	Elderly	EU	KarlssonFH_2013	NA	female	1
S441	70	IGT	SWE	NorthEU	Elderly	EU	KarlssonFH_2013	NA	female	1
S446	68	T2D	SWE	NorthEU	Elderly	EU	KarlssonFH_2013	NA	female	1
S451	71	control	SWE	NorthEU	Elderly	EU	KarlssonFH_2013	NA	female	1
S456	70	control	SWE	NorthEU	Elderly	EU	KarlssonFH_2013	NA	female	1
S457	71	IGT	SWE	NorthEU	Elderly	EU	KarlssonFH_2013	NA	female	1
S458	70	T2D	SWE	NorthEU	Elderly	EU	KarlssonFH_2013	NA	female	1
S462	70	T2D	SWE	NorthEU	Elderly	EU	KarlssonFH_2013	NA	female	1
S463	71	control	SWE	NorthEU	Elderly	EU	KarlssonFH_2013	NA	female	1
S468	70	T2D	HUN	EU	Elderly	EU	KarlssonFH_2013	NA	female	1
S470	70	T2D	SWE	NorthEU	Elderly	EU	KarlssonFH_2013	NA	female	1
S472	70	IGT	SWE	NorthEU	Elderly	EU	KarlssonFH_2013	NA	female	1
S475	70	T2D	DNK	NorthEU	Elderly	EU	KarlssonFH_2013	NA	female	1
S476	71	T2D	SWE	NorthEU	Elderly	EU	KarlssonFH_2013	NA	female	1
S478	70	T2D	SWE	NorthEU	Elderly	EU	KarlssonFH_2013	NA	female	1
S479	71	control	SWE	NorthEU	Elderly	EU	KarlssonFH_2013	NA	female	1
S483	71	T2D	SWE	NorthEU	Elderly	EU	KarlssonFH_2013	NA	female	1
S484	71	T2D	SWE	NorthEU	Elderly	EU	KarlssonFH_2013	NA	female	1
S485	69	IGT	SWE	NorthEU	Elderly	EU	KarlssonFH_2013	NA	female	1
S487	71	IGT	SWE	NorthEU	Elderly	EU	KarlssonFH_2013	NA	female	1
S488	70	IGT	SWE	NorthEU	Elderly	EU	KarlssonFH_2013	NA	female	1
S495	69	T2D	EST	EU	Elderly	EU	KarlssonFH_2013	NA	female	1
S497	70	T2D	SWE	NorthEU	Elderly	EU	KarlssonFH_2013	NA	female	1
S517	71	T2D	SWE	NorthEU	Elderly	EU	KarlssonFH_2013	NA	female	1
S524	70	T2D	SWE	NorthEU	Elderly	EU	KarlssonFH_2013	NA	female	1
S526	71	T2D	SWE	NorthEU	Elderly	EU	KarlssonFH_2013	NA	female	1
S529	69	T2D	SWE	NorthEU	Elderly	EU	KarlssonFH_2013	NA	female	1
S530	70	T2D	SWE	NorthEU	Elderly	EU	KarlssonFH_2013	NA	female	1
S536	70	T2D	SWE	NorthEU	Elderly	EU	KarlssonFH_2013	NA	female	1
S543	71	T2D	SWE	NorthEU	Elderly	EU	KarlssonFH_2013	NA	female	1
S547	70	IGT	SWE	NorthEU	Elderly	EU	KarlssonFH_2013	NA	female	1
S550	70	T2D	SWE	NorthEU	Elderly	EU	KarlssonFH_2013	NA	female	1
S551	71	T2D	SWE	NorthEU	Elderly	EU	KarlssonFH_2013	NA	female	1
S552	70	T2D	SWE	NorthEU	Elderly	EU	KarlssonFH_2013	NA	female	1
S558	71	IGT	SWE	NorthEU	Elderly	EU	KarlssonFH_2013	NA	female	1
S561	71	T2D	SWE	NorthEU	Elderly	EU	KarlssonFH_2013	NA	female	1
S563	69	T2D	FIN	NorthEU	Elderly	EU	KarlssonFH_2013	NA	female	1
S577	70	T2D	SWE	NorthEU	Elderly	EU	KarlssonFH_2013	NA	female	1
S584	70	control	SWE	NorthEU	Elderly	EU	KarlssonFH_2013	NA	female	1
S587	70	T2D	SWE	NorthEU	Elderly	EU	KarlssonFH_2013	NA	female	1
S589	71	T2D	DEU	EU	Elderly	EU	KarlssonFH_2013	NA	female	1
S591	71	T2D	SWE	NorthEU	Elderly	EU	KarlssonFH_2013	NA	female	1
S598	71	T2D	SWE	NorthEU	Elderly	EU	KarlssonFH_2013	NA	female	1
S600	71	IGT	SWE	NorthEU	Elderly	EU	KarlssonFH_2013	NA	female	1
S602	71	T2D	SWE	NorthEU	Elderly	EU	KarlssonFH_2013	NA	female	1
S604	71	T2D	SVK	EU	Elderly	EU	KarlssonFH_2013	NA	female	1
S614	71	control	SWE	NorthEU	Elderly	EU	KarlssonFH_2013	NA	female	1
S617	71	control	SWE	NorthEU	Elderly	EU	KarlssonFH_2013	NA	female	1
S618	71	control	SWE	NorthEU	Elderly	EU	KarlssonFH_2013	NA	female	1
S628	71	control	SWE	NorthEU	Elderly	EU	KarlssonFH_2013	NA	female	1
S638	71	IGT	SWE	NorthEU	Elderly	EU	KarlssonFH_2013	NA	female	1
S640	71	IGT	SWE	NorthEU	Elderly	EU	KarlssonFH_2013	NA	female	1
S643	70	control	SWE	NorthEU	Elderly	EU	KarlssonFH_2013	NA	female	1
S646	71	IGT	SWE	NorthEU	Elderly	EU	KarlssonFH_2013	NA	female	1
S655	71	control	SWE	NorthEU	Elderly	EU	KarlssonFH_2013	NA	female	1
O2_UC1_0	37	IBD	ESP	EU	Young	EU	NielsenHB_2014	31	NA	NA
O2_UC1_2	37	IBD	ESP	EU	Young	EU	NielsenHB_2014	NA	NA	NA
O2_UC11_0	34	IBD	ESP	EU	Young	EU	NielsenHB_2014	18.7	NA	NA
O2_UC11_2	34	IBD	ESP	EU	Young	EU	NielsenHB_2014	NA	NA	NA
O2_UC12_0	43	IBD	ESP	EU	Middle	EU	NielsenHB_2014	21.6	NA	NA
O2_UC12_2	43	IBD	ESP	EU	Middle	EU	NielsenHB_2014	NA	NA	NA
O2_UC13_0	68	IBD	ESP	EU	Elderly	EU	NielsenHB_2014	23.4	NA	NA
O2_UC14_2	31	IBD	ESP	EU	Young	EU	NielsenHB_2014	NA	NA	NA
O2_UC14_0	31	IBD	ESP	EU	Young	EU	NielsenHB_2014	32.7	NA	NA
O2_UC13_2	68	IBD	ESP	EU	Elderly	EU	NielsenHB_2014	NA	NA	NA
O2_UC16_0	47	IBD	ESP	EU	Middle	EU	NielsenHB_2014	26.4	NA	NA
O2_UC16_2	47	IBD	ESP	EU	Middle	EU	NielsenHB_2014	NA	NA	NA
O2_UC17_0	56	IBD	ESP	EU	Middle	EU	NielsenHB_2014	21.9	NA	NA
O2_UC17_2	56	IBD	ESP	EU	Middle	EU	NielsenHB_2014	NA	NA	NA
O2_UC19_0	42	IBD	ESP	EU	Middle	EU	NielsenHB_2014	25.7	NA	NA
O2_UC18_2	48	IBD	ESP	EU	Middle	EU	NielsenHB_2014	NA	NA	NA
O2_UC18_0	48	IBD	ESP	EU	Middle	EU	NielsenHB_2014	24.2	NA	NA
O2_UC19_2	42	IBD	ESP	EU	Middle	EU	NielsenHB_2014	NA	NA	NA
O2_UC2_0	46	IBD	ESP	EU	Middle	EU	NielsenHB_2014	24	NA	NA
O2_UC2_2	46	IBD	ESP	EU	Middle	EU	NielsenHB_2014	NA	NA	NA
O2_UC20_0	51	IBD	ESP	EU	Middle	EU	NielsenHB_2014	24	NA	NA
O2_UC20_2	51	IBD	ESP	EU	Middle	EU	NielsenHB_2014	NA	NA	NA
O2_UC21_0	49	IBD	ESP	EU	Middle	EU	NielsenHB_2014	30.5	NA	NA
O2_UC21_2	49	IBD	ESP	EU	Middle	EU	NielsenHB_2014	NA	NA	NA
O2_UC22_0	44	IBD	ESP	EU	Middle	EU	NielsenHB_2014	25.4	NA	NA
O2_UC22_2	44	IBD	ESP	EU	Middle	EU	NielsenHB_2014	NA	NA	NA
O2_UC23_0	41	IBD	ESP	EU	Middle	EU	NielsenHB_2014	28.2	NA	NA
O2_UC23_2	41	IBD	ESP	EU	Middle	EU	NielsenHB_2014	NA	NA	NA
O2_UC24_0	55	IBD	ESP	EU	Middle	EU	NielsenHB_2014	28.8	NA	NA
O2_UC24_2	55	IBD	ESP	EU	Middle	EU	NielsenHB_2014	NA	NA	NA
O2_UC26_0	41	IBD	ESP	EU	Middle	EU	NielsenHB_2014	24	NA	NA
O2_UC26_2	41	IBD	ESP	EU	Middle	EU	NielsenHB_2014	NA	NA	NA
O2_UC27_0	52	IBD	ESP	EU	Middle	EU	NielsenHB_2014	23.3	NA	NA
O2_UC27_2	52	IBD	ESP	EU	Middle	EU	NielsenHB_2014	NA	NA	NA
O2_UC29_0	55	IBD	ESP	EU	Middle	EU	NielsenHB_2014	26	NA	NA
O2_UC29_2	55	IBD	ESP	EU	Middle	EU	NielsenHB_2014	NA	NA	NA
O2_UC3_0	41	IBD	ESP	EU	Middle	EU	NielsenHB_2014	18.9	NA	NA
O2_UC3_2	41	IBD	ESP	EU	Middle	EU	NielsenHB_2014	NA	NA	NA
O2_UC30_0	51	IBD	ESP	EU	Middle	EU	NielsenHB_2014	23.3	NA	NA
O2_UC30_2	51	IBD	ESP	EU	Middle	EU	NielsenHB_2014	NA	NA	NA
O2_UC31_0	30	IBD	ESP	EU	Young	EU	NielsenHB_2014	22.7	NA	NA
O2_UC31_2	30	IBD	ESP	EU	Young	EU	NielsenHB_2014	NA	NA	NA
O2_UC32_0	54	IBD	ESP	EU	Middle	EU	NielsenHB_2014	26.8	NA	NA
O2_UC32_2	54	IBD	ESP	EU	Middle	EU	NielsenHB_2014	NA	NA	NA
O2_UC34_0	64	IBD	ESP	EU	Elderly	EU	NielsenHB_2014	25	NA	NA
O2_UC34_2	64	IBD	ESP	EU	Elderly	EU	NielsenHB_2014	NA	NA	NA
O2_UC35_0	39	IBD	ESP	EU	Young	EU	NielsenHB_2014	30.3	NA	NA
O2_UC35_2	39	IBD	ESP	EU	Young	EU	NielsenHB_2014	NA	NA	NA
O2_UC36_2	43	IBD	ESP	EU	Middle	EU	NielsenHB_2014	NA	NA	NA
O2_UC37_0	44	IBD	ESP	EU	Middle	EU	NielsenHB_2014	23.3	NA	NA
O2_UC37_2	44	IBD	ESP	EU	Middle	EU	NielsenHB_2014	NA	NA	NA
O2_UC38_0	55	IBD	ESP	EU	Middle	EU	NielsenHB_2014	31	NA	NA
O2_UC38_2	55	IBD	ESP	EU	Middle	EU	NielsenHB_2014	NA	NA	NA
O2_UC4_0	57	IBD	ESP	EU	Middle	EU	NielsenHB_2014	28.5	NA	NA
O2_UC4_2	57	IBD	ESP	EU	Middle	EU	NielsenHB_2014	NA	NA	NA
O2_UC40_0	35	IBD	ESP	EU	Young	EU	NielsenHB_2014	22.7	NA	NA
O2_UC40_2	35	IBD	ESP	EU	Young	EU	NielsenHB_2014	NA	NA	NA
O2_UC41_0	43	IBD	ESP	EU	Middle	EU	NielsenHB_2014	29.3	NA	NA
O2_UC41_2	43	IBD	ESP	EU	Middle	EU	NielsenHB_2014	NA	NA	NA
O2_UC43_0	24	IBD	ESP	EU	Young	EU	NielsenHB_2014	20.2	NA	NA
O2_UC43_2	24	IBD	ESP	EU	Young	EU	NielsenHB_2014	NA	NA	NA
O2_UC44_0	45	IBD	ESP	EU	Middle	EU	NielsenHB_2014	30.3	NA	NA
O2_UC44_2	45	IBD	ESP	EU	Middle	EU	NielsenHB_2014	NA	NA	NA
O2_UC46_0	32	IBD	ESP	EU	Young	EU	NielsenHB_2014	35.6	NA	NA
O2_UC46_2	32	IBD	ESP	EU	Young	EU	NielsenHB_2014	NA	NA	NA
O2_UC47_0	29	IBD	ESP	EU	Young	EU	NielsenHB_2014	21.5	NA	NA
O2_UC47_2	29	IBD	ESP	EU	Young	EU	NielsenHB_2014	NA	NA	NA
O2_UC48_0	46	IBD	ESP	EU	Middle	EU	NielsenHB_2014	18.8	NA	NA
O2_UC48_2	46	IBD	ESP	EU	Middle	EU	NielsenHB_2014	NA	NA	NA
O2_UC49_0	22	control	ESP	EU	Young	EU	NielsenHB_2014	23.1	NA	NA
O2_UC49_2	22	control	ESP	EU	Young	EU	NielsenHB_2014	NA	NA	NA
O2_UC5_0	40	IBD	ESP	EU	Middle	EU	NielsenHB_2014	20.9	NA	NA
O2_UC5_2	40	IBD	ESP	EU	Middle	EU	NielsenHB_2014	NA	NA	NA
O2_UC50_0	24	control	ESP	EU	Young	EU	NielsenHB_2014	22.7	NA	NA
O2_UC50_2	24	control	ESP	EU	Young	EU	NielsenHB_2014	NA	NA	NA
O2_UC51_0	32	control	ESP	EU	Young	EU	NielsenHB_2014	17.6	NA	NA
O2_UC51_2	32	control	ESP	EU	Young	EU	NielsenHB_2014	NA	NA	NA
O2_UC52_0	32	control	ESP	EU	Young	EU	NielsenHB_2014	19.8	NA	NA
O2_UC53_0	21	control	ESP	EU	Young	EU	NielsenHB_2014	27.8	NA	NA
O2_UC53_2	21	control	ESP	EU	Young	EU	NielsenHB_2014	NA	NA	NA
O2_UC54_0	20	control	ESP	EU	Young	EU	NielsenHB_2014	21.2	NA	NA
O2_UC54_2	20	control	ESP	EU	Young	EU	NielsenHB_2014	NA	NA	NA
O2_UC55_0	44	control	ESP	EU	Middle	EU	NielsenHB_2014	19.6	NA	NA
O2_UC55_2	44	control	ESP	EU	Middle	EU	NielsenHB_2014	NA	NA	NA
O2_UC56_0	29	control	ESP	EU	Young	EU	NielsenHB_2014	26.2	NA	NA
O2_UC56_2	29	control	ESP	EU	Young	EU	NielsenHB_2014	NA	NA	NA
O2_UC57_0	29	control	ESP	EU	Young	EU	NielsenHB_2014	23.2	NA	NA
O2_UC57_2	29	control	ESP	EU	Young	EU	NielsenHB_2014	NA	NA	NA
O2_UC58_0	42	control	ESP	EU	Middle	EU	NielsenHB_2014	26.7	NA	NA
O2_UC58_2	42	control	ESP	EU	Middle	EU	NielsenHB_2014	NA	NA	NA
O2_UC59_0	41	control	ESP	EU	Middle	EU	NielsenHB_2014	23.7	NA	NA
O2_UC59_2	41	control	ESP	EU	Middle	EU	NielsenHB_2014	NA	NA	NA
O2_UC60_0	35	control	ESP	EU	Young	EU	NielsenHB_2014	27.4	NA	NA
O2_UC60_2	35	control	ESP	EU	Young	EU	NielsenHB_2014	NA	NA	NA
O2_UC9_0	52	IBD	ESP	EU	Middle	EU	NielsenHB_2014	24.2	NA	NA
O2_UC9_2	52	IBD	ESP	EU	Middle	EU	NielsenHB_2014	NA	NA	NA
V1_CD1_0	25	IBD	ESP	EU	Young	EU	NielsenHB_2014	17.9	NA	NA
V1_CD10_0	38	IBD	ESP	EU	Young	EU	NielsenHB_2014	29.4	NA	NA
V1_CD11_0	62	control	ESP	EU	Elderly	EU	NielsenHB_2014	35.5	NA	NA
V1_CD12_0	41	IBD	ESP	EU	Middle	EU	NielsenHB_2014	20.2	NA	NA
V1_CD13_0	68	control	ESP	EU	Elderly	EU	NielsenHB_2014	25.7	NA	NA
V1_CD14_0	41	control	ESP	EU	Middle	EU	NielsenHB_2014	23.1	NA	NA
V1_CD15_0	34	IBD	ESP	EU	Young	EU	NielsenHB_2014	19	NA	NA
V1_CD16_0	68	control	ESP	EU	Elderly	EU	NielsenHB_2014	21.6	NA	NA
V1_CD17_0	21	IBD	ESP	EU	Young	EU	NielsenHB_2014	21.7	NA	NA
V1_CD17_4	21	IBD	ESP	EU	Young	EU	NielsenHB_2014	23.4	NA	NA
V1_CD19_0	42	control	ESP	EU	Middle	EU	NielsenHB_2014	26	NA	NA
V1_CD2_0	49	control	ESP	EU	Middle	EU	NielsenHB_2014	27.8	NA	NA
V1_CD20_4	26	IBD	ESP	EU	Young	EU	NielsenHB_2014	21.6	NA	NA
V1_CD21_0	34	IBD	ESP	EU	Young	EU	NielsenHB_2014	19.1	NA	NA
V1_CD21_4	34	IBD	ESP	EU	Young	EU	NielsenHB_2014	19.1	NA	NA
V1_CD22_0	68	control	ESP	EU	Elderly	EU	NielsenHB_2014	24.2	NA	NA
V1_CD24_0	41	control	ESP	EU	Middle	EU	NielsenHB_2014	20.6	NA	NA
V1_CD25_0	41	IBD	ESP	EU	Middle	EU	NielsenHB_2014	16.9	NA	NA
V1_CD25_4	41	IBD	ESP	EU	Middle	EU	NielsenHB_2014	17.3	NA	NA
V1_CD27_0	36	control	ESP	EU	Young	EU	NielsenHB_2014	24.8	NA	NA
V1_CD28_0	24	control	ESP	EU	Young	EU	NielsenHB_2014	21.5	NA	NA
V1_CD29_0	60	control	ESP	EU	Elderly	EU	NielsenHB_2014	31.2	NA	NA
V1_CD30_0	59	control	ESP	EU	Middle	EU	NielsenHB_2014	19.8	NA	NA
V1_CD31_0	28	control	ESP	EU	Young	EU	NielsenHB_2014	22.6	NA	NA
V1_CD34_0	54	control	ESP	EU	Middle	EU	NielsenHB_2014	23.6	NA	NA
V1_CD35_0	27	IBD	ESP	EU	Young	EU	NielsenHB_2014	28.7	NA	NA
V1_CD35_1	27	IBD	ESP	EU	Young	EU	NielsenHB_2014	29.4	NA	NA
V1_CD36_0	20	control	ESP	EU	Young	EU	NielsenHB_2014	22	NA	NA
V1_CD38_0	63	control	ESP	EU	Elderly	EU	NielsenHB_2014	26.8	NA	NA
V1_CD4_0	46	control	ESP	EU	Middle	EU	NielsenHB_2014	29.7	NA	NA
V1_CD41_0	25	IBD	ESP	EU	Young	EU	NielsenHB_2014	19	NA	NA
V1_CD42_0	48	control	ESP	EU	Middle	EU	NielsenHB_2014	24.8	NA	NA
V1_CD6_0	36	IBD	ESP	EU	Young	EU	NielsenHB_2014	18.5	NA	NA
V1_CD6_4	36	IBD	ESP	EU	Young	EU	NielsenHB_2014	19.8	NA	NA
V1_CD7_0	22	IBD	ESP	EU	Young	EU	NielsenHB_2014	18.2	NA	NA
V1_CD7_4	22	IBD	ESP	EU	Young	EU	NielsenHB_2014	19.5	NA	NA
V1_CD8_0	51	control	ESP	EU	Middle	EU	NielsenHB_2014	29.4	NA	NA
V1_CD9_0	48	control	ESP	EU	Middle	EU	NielsenHB_2014	27.5	NA	NA
V1_UC1_0	31	IBD	ESP	EU	Young	EU	NielsenHB_2014	17.1	NA	NA
V1_UC10_0	45	IBD	ESP	EU	Middle	EU	NielsenHB_2014	27.3	NA	NA
V1_UC10_2	45	IBD	ESP	EU	Middle	EU	NielsenHB_2014	27.3	NA	NA
V1_UC11_0	48	IBD	ESP	EU	Middle	EU	NielsenHB_2014	22.3	NA	NA
V1_UC11_5	48	IBD	ESP	EU	Middle	EU	NielsenHB_2014	23	NA	NA
V1_UC12_0	41	IBD	ESP	EU	Middle	EU	NielsenHB_2014	19.9	NA	NA
V1_UC12_4	41	IBD	ESP	EU	Middle	EU	NielsenHB_2014	19.8	NA	NA
V1_UC13_0	51	IBD	ESP	EU	Middle	EU	NielsenHB_2014	28.5	NA	NA
V1_UC13_3	51	IBD	ESP	EU	Middle	EU	NielsenHB_2014	28.9	NA	NA
V1_UC14_0	53	IBD	ESP	EU	Middle	EU	NielsenHB_2014	20.3	NA	NA
V1_UC14_1	53	IBD	ESP	EU	Middle	EU	NielsenHB_2014	20.1	NA	NA
V1_UC15_0	25	IBD	ESP	EU	Young	EU	NielsenHB_2014	22.8	NA	NA
V1_UC15_3	25	IBD	ESP	EU	Young	EU	NielsenHB_2014	23.2	NA	NA
V1_UC16_0	25	control	ESP	EU	Young	EU	NielsenHB_2014	23.9	NA	NA
V1_UC17_0	41	IBD	ESP	EU	Middle	EU	NielsenHB_2014	24.5	NA	NA
V1_UC17_2	41	IBD	ESP	EU	Middle	EU	NielsenHB_2014	24.8	NA	NA
V1_UC18_0	63	control	ESP	EU	Elderly	EU	NielsenHB_2014	28.7	NA	NA
V1_UC19_0	37	control	ESP	EU	Young	EU	NielsenHB_2014	21.2	NA	NA
V1_UC2_0	62	IBD	ESP	EU	Elderly	EU	NielsenHB_2014	27.8	NA	NA
V1_UC2_4	62	IBD	ESP	EU	Elderly	EU	NielsenHB_2014	30	NA	NA
V1_UC21_0	62	IBD	ESP	EU	Elderly	EU	NielsenHB_2014	25.2	NA	NA
V1_UC21_4	62	IBD	ESP	EU	Elderly	EU	NielsenHB_2014	26.3	NA	NA
V1_UC23_0	43	IBD	ESP	EU	Middle	EU	NielsenHB_2014	28.7	NA	NA
V1_UC23_1	43	IBD	ESP	EU	Middle	EU	NielsenHB_2014	26.5	NA	NA
V1_UC24_0	62	control	ESP	EU	Elderly	EU	NielsenHB_2014	33.3	NA	NA
V1_UC25_0	52	IBD	ESP	EU	Middle	EU	NielsenHB_2014	23.4	NA	NA
V1_UC25_1	52	IBD	ESP	EU	Middle	EU	NielsenHB_2014	23	NA	NA
V1_UC26_0	36	IBD	ESP	EU	Young	EU	NielsenHB_2014	28.6	NA	NA
V1_UC26_4	36	IBD	ESP	EU	Young	EU	NielsenHB_2014	26.3	NA	NA
V1_UC27_0	66	control	ESP	EU	Elderly	EU	NielsenHB_2014	26.7	NA	NA
V1_UC28_0	61	control	ESP	EU	Elderly	EU	NielsenHB_2014	24.6	NA	NA
V1_UC29_0	46	control	ESP	EU	Middle	EU	NielsenHB_2014	24.4	NA	NA
V1_UC3_0	44	IBD	ESP	EU	Middle	EU	NielsenHB_2014	20.6	NA	NA
V1_UC3_2	44	IBD	ESP	EU	Middle	EU	NielsenHB_2014	19.3	NA	NA
V1_UC30_0	41	control	ESP	EU	Middle	EU	NielsenHB_2014	23.3	NA	NA
V1_UC31_0	26	IBD	ESP	EU	Young	EU	NielsenHB_2014	20.4	NA	NA
V1_UC31_4	26	IBD	ESP	EU	Young	EU	NielsenHB_2014	22.2	NA	NA
V1_UC32_0	56	control	ESP	EU	Middle	EU	NielsenHB_2014	25.7	NA	NA
V1_UC33_0	53	control	ESP	EU	Middle	EU	NielsenHB_2014	26.5	NA	NA
V1_UC34_0	31	control	ESP	EU	Young	EU	NielsenHB_2014	23.1	NA	NA
V1_UC35_0	33	IBD	ESP	EU	Young	EU	NielsenHB_2014	19.4	NA	NA
V1_UC35_4	33	IBD	ESP	EU	Young	EU	NielsenHB_2014	20.4	NA	NA
V1_UC36_0	34	control	ESP	EU	Young	EU	NielsenHB_2014	20.4	NA	NA
V1_UC38_0	24	IBD	ESP	EU	Young	EU	NielsenHB_2014	18.1	NA	NA
V1_UC39_0	26	IBD	ESP	EU	Young	EU	NielsenHB_2014	22.4	NA	NA
V1_UC4_0	47	IBD	ESP	EU	Middle	EU	NielsenHB_2014	26.4	NA	NA
V1_UC4_5	47	IBD	ESP	EU	Middle	EU	NielsenHB_2014	26.4	NA	NA
V1_UC40_0	32	IBD	ESP	EU	Young	EU	NielsenHB_2014	25.9	NA	NA
V1_UC41_0	54	control	ESP	EU	Middle	EU	NielsenHB_2014	23.9	NA	NA
V1_UC42_0	32	control	ESP	EU	Young	EU	NielsenHB_2014	19.6	NA	NA
V1_UC43_0	27	control	ESP	EU	Young	EU	NielsenHB_2014	17.7	NA	NA
V1_UC44_0	20	control	ESP	EU	Young	EU	NielsenHB_2014	20.3	NA	NA
V1_UC45_0	50	IBD	ESP	EU	Middle	EU	NielsenHB_2014	23	NA	NA
V1_UC46_0	55	control	ESP	EU	Middle	EU	NielsenHB_2014	35	NA	NA
V1_UC47_0	46	IBD	ESP	EU	Middle	EU	NielsenHB_2014	25.7	NA	NA
V1_UC48_0	26	control	ESP	EU	Young	EU	NielsenHB_2014	20.9	NA	NA
V1_UC49_0	25	IBD	ESP	EU	Young	EU	NielsenHB_2014	19.8	NA	NA
V1_UC49_1	25	IBD	ESP	EU	Young	EU	NielsenHB_2014	20.2	NA	NA
V1_UC5_0	30	IBD	ESP	EU	Young	EU	NielsenHB_2014	20.3	NA	NA
V1_UC5_3	30	IBD	ESP	EU	Young	EU	NielsenHB_2014	20.7	NA	NA
V1_UC50_1	45	IBD	ESP	EU	Middle	EU	NielsenHB_2014	20.7	NA	NA
V1_UC51_0	44	IBD	ESP	EU	Middle	EU	NielsenHB_2014	23.3	NA	NA
V1_UC51_4	44	IBD	ESP	EU	Middle	EU	NielsenHB_2014	23.3	NA	NA
V1_UC52_0	43	IBD	ESP	EU	Middle	EU	NielsenHB_2014	29.3	NA	NA
V1_UC52_1	43	IBD	ESP	EU	Middle	EU	NielsenHB_2014	29.3	NA	NA
V1_UC53_0	24	IBD	ESP	EU	Young	EU	NielsenHB_2014	20.2	NA	NA
V1_UC53_4	24	IBD	ESP	EU	Young	EU	NielsenHB_2014	19.6	NA	NA
V1_UC54_0	32	IBD	ESP	EU	Young	EU	NielsenHB_2014	35.6	NA	NA
V1_UC55_0	46	IBD	ESP	EU	Middle	EU	NielsenHB_2014	18.8	NA	NA
V1_UC55_4	46	IBD	ESP	EU	Middle	EU	NielsenHB_2014	18.8	NA	NA
V1_UC56_0	35	IBD	ESP	EU	Young	EU	NielsenHB_2014	18.8	NA	NA
V1_UC58_0	41	IBD	ESP	EU	Middle	EU	NielsenHB_2014	28.4	NA	NA
V1_UC57_0	32	control	ESP	EU	Young	EU	NielsenHB_2014	20	NA	NA
V1_UC6_0	38	control	ESP	EU	Young	EU	NielsenHB_2014	23.2	NA	NA
V1_UC61_0	33	control	ESP	EU	Young	EU	NielsenHB_2014	27.8	NA	NA
V1_UC62_0	37	control	ESP	EU	Young	EU	NielsenHB_2014	22.6	NA	NA
V1_UC8_0	22	control	ESP	EU	Young	EU	NielsenHB_2014	25.4	NA	NA
V1_UC9_0	32	control	ESP	EU	Young	EU	NielsenHB_2014	30.4	NA	NA
HCO11	36	control	PER	Other	Young	Other	Obregon-TitoAJ_2015	23.05	male	NA
HCO12	35	control	PER	Other	Young	Other	Obregon-TitoAJ_2015	27.01	female	NA
HCO53	44	control	PER	Other	Middle	Other	Obregon-TitoAJ_2015	29.52	female	NA
HCO61	20	control	PER	Other	Young	Other	Obregon-TitoAJ_2015	NA	female	NA
HCO67	26	control	PER	Other	Young	Other	Obregon-TitoAJ_2015	19.53	female	NA
HCO70	40	control	PER	Other	Middle	Other	Obregon-TitoAJ_2015	NA	female	NA
HCO74	36	control	PER	Other	Young	Other	Obregon-TitoAJ_2015	31.53	female	NA
SM01	30	control	PER	Other	Young	Other	Obregon-TitoAJ_2015	NA	male	NA
SM02	25	control	PER	Other	Young	Other	Obregon-TitoAJ_2015	23.95	female	NA
SM18	36	control	PER	Other	Young	Other	Obregon-TitoAJ_2015	26.44	female	NA
SM20	20	control	PER	Other	Young	Other	Obregon-TitoAJ_2015	21.27	female	NA
SM28	52	control	PER	Other	Middle	Other	Obregon-TitoAJ_2015	19.47	female	NA
SM29	50	control	PER	Other	Middle	Other	Obregon-TitoAJ_2015	17.9	female	NA
SM31	30	control	PER	Other	Young	Other	Obregon-TitoAJ_2015	22.6	male	NA
SM32	21	control	PER	Other	Young	Other	Obregon-TitoAJ_2015	22.14	female	NA
SM39	40	control	PER	Other	Middle	Other	Obregon-TitoAJ_2015	28.93	female	NA
NO01	23	control	USA	NorthAmerica	Young	NorthAmerica	Obregon-TitoAJ_2015	21.69	male	NA
NO02	37	control	USA	NorthAmerica	Young	NorthAmerica	Obregon-TitoAJ_2015	20.52	female	NA
NO03	40	control	USA	NorthAmerica	Middle	NorthAmerica	Obregon-TitoAJ_2015	23.37	male	NA
NO04	26	control	USA	NorthAmerica	Young	NorthAmerica	Obregon-TitoAJ_2015	24.16	male	NA
NO05	28	control	USA	NorthAmerica	Young	NorthAmerica	Obregon-TitoAJ_2015	22.19	male	NA
NO06	28	control	USA	NorthAmerica	Young	NorthAmerica	Obregon-TitoAJ_2015	23.49	male	NA
NO08	32	control	USA	NorthAmerica	Young	NorthAmerica	Obregon-TitoAJ_2015	20.01	female	NA
NO09	34	control	USA	NorthAmerica	Young	NorthAmerica	Obregon-TitoAJ_2015	23.77	female	NA
NO10	41	control	USA	NorthAmerica	Middle	NorthAmerica	Obregon-TitoAJ_2015	26.58	male	NA
NO11	26	control	USA	NorthAmerica	Young	NorthAmerica	Obregon-TitoAJ_2015	23.93	male	NA
NO12	27	control	USA	NorthAmerica	Young	NorthAmerica	Obregon-TitoAJ_2015	28.62	female	NA
NO13	35	control	USA	NorthAmerica	Young	NorthAmerica	Obregon-TitoAJ_2015	20.34	male	NA
NO15	50	control	USA	NorthAmerica	Middle	NorthAmerica	Obregon-TitoAJ_2015	25.92	female	NA
NO16	47	control	USA	NorthAmerica	Middle	NorthAmerica	Obregon-TitoAJ_2015	30.86	male	NA
NO19	32	control	USA	NorthAmerica	Young	NorthAmerica	Obregon-TitoAJ_2015	19.3	female	NA
NO20	26	control	USA	NorthAmerica	Young	NorthAmerica	Obregon-TitoAJ_2015	27.86	male	NA
NO21	23	control	USA	NorthAmerica	Young	NorthAmerica	Obregon-TitoAJ_2015	24.78	male	NA
NO22	26	control	USA	NorthAmerica	Young	NorthAmerica	Obregon-TitoAJ_2015	30.22	male	NA
NO23	26	control	USA	NorthAmerica	Young	NorthAmerica	Obregon-TitoAJ_2015	26.53	female	NA
DLF001	59	T2D	CHN	Asia	Middle	Asia	QinJ_2012	19.83	female	NA
DLF002	43	T2D	CHN	Asia	Middle	Asia	QinJ_2012	17.58	female	NA
DLF003	46	T2D	CHN	Asia	Middle	Asia	QinJ_2012	20.31	female	NA
DLF004	25	T2D	CHN	Asia	Young	Asia	QinJ_2012	19.78	female	NA
DLF005	60	T2D	CHN	Asia	Elderly	Asia	QinJ_2012	18.43	female	NA
DLF006	71	T2D	CHN	Asia	Elderly	Asia	QinJ_2012	16	female	NA
DLF007	62	T2D	CHN	Asia	Elderly	Asia	QinJ_2012	19.69	female	NA
DLF008	54	T2D	CHN	Asia	Middle	Asia	QinJ_2012	19.4	female	NA
DLF009	53	T2D	CHN	Asia	Middle	Asia	QinJ_2012	18.49	female	NA
DLF010	51	T2D	CHN	Asia	Middle	Asia	QinJ_2012	19.29	female	NA
DLF012	52	T2D	CHN	Asia	Middle	Asia	QinJ_2012	19.47	female	NA
DLF013	49	T2D	CHN	Asia	Middle	Asia	QinJ_2012	19.63	female	NA
DLF014	61	T2D	CHN	Asia	Elderly	Asia	QinJ_2012	19.98	female	NA
DLM001	46	T2D	CHN	Asia	Middle	Asia	QinJ_2012	20.24	male	NA
DLM002	29	T2D	CHN	Asia	Young	Asia	QinJ_2012	17.73	male	NA
DLM003	41	T2D	CHN	Asia	Middle	Asia	QinJ_2012	20.8	male	NA
DLM004	38	T2D	CHN	Asia	Young	Asia	QinJ_2012	20.2	male	NA
DLM005	35	T2D	CHN	Asia	Young	Asia	QinJ_2012	19.72	male	NA
DLM006	28	T2D	CHN	Asia	Young	Asia	QinJ_2012	18.59	male	NA
DLM007	43	T2D	CHN	Asia	Middle	Asia	QinJ_2012	20.05	male	NA
DLM008	38	T2D	CHN	Asia	Young	Asia	QinJ_2012	19.59	male	NA
DLM009	30	T2D	CHN	Asia	Young	Asia	QinJ_2012	20.05	male	NA
DLM010	37	T2D	CHN	Asia	Young	Asia	QinJ_2012	19.03	male	NA
DLM011	49	T2D	CHN	Asia	Middle	Asia	QinJ_2012	20.05	male	NA
DLM012	55	T2D	CHN	Asia	Middle	Asia	QinJ_2012	20.57	male	NA
DLM013	51	T2D	CHN	Asia	Middle	Asia	QinJ_2012	18.37	male	NA
DLM014	48	T2D	CHN	Asia	Middle	Asia	QinJ_2012	20.31	male	NA
DLM015	56	T2D	CHN	Asia	Middle	Asia	QinJ_2012	21.11	male	NA
DLM016	70	T2D	CHN	Asia	Elderly	Asia	QinJ_2012	20.9	male	NA
DLM017	52	T2D	CHN	Asia	Middle	Asia	QinJ_2012	18.83	male	NA
DLM018	49	T2D	CHN	Asia	Middle	Asia	QinJ_2012	20.07	male	NA
DLM019	47	T2D	CHN	Asia	Middle	Asia	QinJ_2012	20.08	male	NA
DLM020	41	T2D	CHN	Asia	Middle	Asia	QinJ_2012	20.62	male	NA
DLM021	58	T2D	CHN	Asia	Middle	Asia	QinJ_2012	18.21	male	NA
DLM022	53	T2D	CHN	Asia	Middle	Asia	QinJ_2012	19.84	male	NA
DLM023	45	T2D	CHN	Asia	Middle	Asia	QinJ_2012	20.81	male	NA
DLM024	39	T2D	CHN	Asia	Young	Asia	QinJ_2012	20.57	male	NA
DLM027	70	T2D	CHN	Asia	Elderly	Asia	QinJ_2012	21.6	male	NA
DLM028	63	T2D	CHN	Asia	Elderly	Asia	QinJ_2012	20.42	male	NA
DOF002	56	T2D	CHN	Asia	Middle	Asia	QinJ_2012	25.3	female	NA
DOF003	59	T2D	CHN	Asia	Middle	Asia	QinJ_2012	26.71	female	NA
DOF004	63	T2D	CHN	Asia	Elderly	Asia	QinJ_2012	25.39	female	NA
DOF006	51	T2D	CHN	Asia	Middle	Asia	QinJ_2012	26.04	female	NA
DOF007	70	T2D	CHN	Asia	Elderly	Asia	QinJ_2012	25.78	female	NA
DOF008	40	T2D	CHN	Asia	Middle	Asia	QinJ_2012	25.84	female	NA
DOF009	68	T2D	CHN	Asia	Elderly	Asia	QinJ_2012	27.64	female	NA
DOF010	62	T2D	CHN	Asia	Elderly	Asia	QinJ_2012	27.78	female	NA
DOF011	48	T2D	CHN	Asia	Middle	Asia	QinJ_2012	27.06	female	NA
DOF012	61	T2D	CHN	Asia	Elderly	Asia	QinJ_2012	27.15	female	NA
DOF013	53	T2D	CHN	Asia	Middle	Asia	QinJ_2012	25.97	female	NA
DOF014	63	T2D	CHN	Asia	Elderly	Asia	QinJ_2012	29.79	female	NA
DOM001	59	T2D	CHN	Asia	Middle	Asia	QinJ_2012	25.26	male	NA
DOM003	53	T2D	CHN	Asia	Middle	Asia	QinJ_2012	25.16	male	NA
DOM005	49	T2D	CHN	Asia	Middle	Asia	QinJ_2012	25.31	male	NA
DOM008	75	T2D	CHN	Asia	Elderly	Asia	QinJ_2012	25.39	male	NA
DOM010	74	T2D	CHN	Asia	Elderly	Asia	QinJ_2012	25.75	male	NA
DOM012	57	T2D	CHN	Asia	Middle	Asia	QinJ_2012	25.69	male	NA
DOM013	36	T2D	CHN	Asia	Young	Asia	QinJ_2012	26.82	male	NA
DOM014	71	T2D	CHN	Asia	Elderly	Asia	QinJ_2012	25.39	male	NA
DOM015	68	T2D	CHN	Asia	Elderly	Asia	QinJ_2012	25.35	male	NA
DOM016	39	T2D	CHN	Asia	Young	Asia	QinJ_2012	27.58	male	NA
DOM017	41	T2D	CHN	Asia	Middle	Asia	QinJ_2012	27.72	male	NA
DOM018	68	T2D	CHN	Asia	Elderly	Asia	QinJ_2012	25.5	male	NA
DOM019	53	T2D	CHN	Asia	Middle	Asia	QinJ_2012	25.31	male	NA
DOM020	43	T2D	CHN	Asia	Middle	Asia	QinJ_2012	25.65	male	NA
DOM021	72	T2D	CHN	Asia	Elderly	Asia	QinJ_2012	25.71	male	NA
DOM022	31	T2D	CHN	Asia	Young	Asia	QinJ_2012	27.43	male	NA
DOM023	39	T2D	CHN	Asia	Young	Asia	QinJ_2012	25.51	male	NA
DOM024	42	T2D	CHN	Asia	Middle	Asia	QinJ_2012	25.39	male	NA
DOM025	62	T2D	CHN	Asia	Elderly	Asia	QinJ_2012	25.39	male	NA
DOM026	36	T2D	CHN	Asia	Young	Asia	QinJ_2012	27.28	male	NA
NLF001	31	control	CHN	Asia	Young	Asia	QinJ_2012	17.94	female	NA
NLF002	34	control	CHN	Asia	Young	Asia	QinJ_2012	17.97	female	NA
NLF005	44	control	CHN	Asia	Middle	Asia	QinJ_2012	19.33	female	NA
NLF006	27	control	CHN	Asia	Young	Asia	QinJ_2012	17.8	female	NA
NLF007	39	control	CHN	Asia	Young	Asia	QinJ_2012	20.57	female	NA
NLF008	26	control	CHN	Asia	Young	Asia	QinJ_2012	18.03	female	NA
NLF009	27	control	CHN	Asia	Young	Asia	QinJ_2012	18.99	female	NA
NLF010	35	control	CHN	Asia	Young	Asia	QinJ_2012	20.17	female	NA
NLF011	25	control	CHN	Asia	Young	Asia	QinJ_2012	18.52	female	NA
NLF012	27	control	CHN	Asia	Young	Asia	QinJ_2012	19.53	female	NA
NLF013	32	control	CHN	Asia	Young	Asia	QinJ_2012	18.2	female	NA
NLF014	37	control	CHN	Asia	Young	Asia	QinJ_2012	18.67	female	NA
NLF015	59	control	CHN	Asia	Middle	Asia	QinJ_2012	19.15	female	NA
NLM001	32	control	CHN	Asia	Young	Asia	QinJ_2012	19.14	male	NA
NLM002	23	control	CHN	Asia	Young	Asia	QinJ_2012	18.72	male	NA
NLM003	23	control	CHN	Asia	Young	Asia	QinJ_2012	19.49	male	NA
NLM004	24	control	CHN	Asia	Young	Asia	QinJ_2012	19.35	male	NA
NLM005	42	control	CHN	Asia	Middle	Asia	QinJ_2012	19.13	male	NA
NLM006	24	control	CHN	Asia	Young	Asia	QinJ_2012	19.03	male	NA
NLM007	22	control	CHN	Asia	Young	Asia	QinJ_2012	19.92	male	NA
NLM008	22	control	CHN	Asia	Young	Asia	QinJ_2012	19.57	male	NA
NLM009	24	control	CHN	Asia	Young	Asia	QinJ_2012	18.37	male	NA
NLM010	23	control	CHN	Asia	Young	Asia	QinJ_2012	19.96	male	NA
NLM015	23	control	CHN	Asia	Young	Asia	QinJ_2012	18.07	male	NA
NLM016	23	control	CHN	Asia	Young	Asia	QinJ_2012	19.47	male	NA
NLM017	23	control	CHN	Asia	Young	Asia	QinJ_2012	19.16	male	NA
NLM021	25	control	CHN	Asia	Young	Asia	QinJ_2012	18.59	male	NA
NLM022	29	control	CHN	Asia	Young	Asia	QinJ_2012	19.84	male	NA
NLM023	38	control	CHN	Asia	Young	Asia	QinJ_2012	19.38	male	NA
NLM024	23	control	CHN	Asia	Young	Asia	QinJ_2012	19.38	male	NA
NLM026	24	control	CHN	Asia	Young	Asia	QinJ_2012	20.66	male	NA
NLM027	22	control	CHN	Asia	Young	Asia	QinJ_2012	19.36	male	NA
NLM028	21	control	CHN	Asia	Young	Asia	QinJ_2012	19.05	male	NA
NLM029	25	control	CHN	Asia	Young	Asia	QinJ_2012	19.44	male	NA
NLM031	33	control	CHN	Asia	Young	Asia	QinJ_2012	20.31	male	NA
NLM032	39	control	CHN	Asia	Young	Asia	QinJ_2012	19.49	male	NA
NOF001	45	control	CHN	Asia	Middle	Asia	QinJ_2012	25.51	female	NA
NOF002	51	control	CHN	Asia	Middle	Asia	QinJ_2012	26.56	female	NA
NOF004	33	control	CHN	Asia	Young	Asia	QinJ_2012	25.07	female	NA
NOF005	32	control	CHN	Asia	Young	Asia	QinJ_2012	25.39	female	NA
NOF006	35	control	CHN	Asia	Young	Asia	QinJ_2012	26.13	female	NA
NOF007	32	control	CHN	Asia	Young	Asia	QinJ_2012	24.89	female	NA
NOF008	30	control	CHN	Asia	Young	Asia	QinJ_2012	26.71	female	NA
NOF009	26	control	CHN	Asia	Young	Asia	QinJ_2012	25.24	female	NA
NOF010	40	control	CHN	Asia	Middle	Asia	QinJ_2012	24.89	female	NA
NOF011	30	control	CHN	Asia	Young	Asia	QinJ_2012	25.39	female	NA
NOF012	38	control	CHN	Asia	Young	Asia	QinJ_2012	25.81	female	NA
NOF013	41	control	CHN	Asia	Middle	Asia	QinJ_2012	25.48	female	NA
NOF014	42	control	CHN	Asia	Middle	Asia	QinJ_2012	25.59	female	NA
NOM001	48	control	CHN	Asia	Middle	Asia	QinJ_2012	26.45	male	NA
NOM002	68	control	CHN	Asia	Elderly	Asia	QinJ_2012	28.3	male	NA
NOM004	32	control	CHN	Asia	Young	Asia	QinJ_2012	29.06	male	NA
NOM005	46	control	CHN	Asia	Middle	Asia	QinJ_2012	25.4	male	NA
NOM007	72	control	CHN	Asia	Elderly	Asia	QinJ_2012	23.66	male	NA
NOM008	54	control	CHN	Asia	Middle	Asia	QinJ_2012	26.57	male	NA
NOM009	33	control	CHN	Asia	Young	Asia	QinJ_2012	25.18	male	NA
NOM010	30	control	CHN	Asia	Young	Asia	QinJ_2012	25.71	male	NA
NOM012	32	control	CHN	Asia	Young	Asia	QinJ_2012	25.71	male	NA
NOM013	42	control	CHN	Asia	Middle	Asia	QinJ_2012	26.22	male	NA
NOM014	41	control	CHN	Asia	Middle	Asia	QinJ_2012	25.1	male	NA
NOM015	32	control	CHN	Asia	Young	Asia	QinJ_2012	25.73	male	NA
NOM016	37	control	CHN	Asia	Young	Asia	QinJ_2012	24.77	male	NA
NOM017	39	control	CHN	Asia	Young	Asia	QinJ_2012	27.24	male	NA
NOM018	43	control	CHN	Asia	Middle	Asia	QinJ_2012	25	male	NA
NOM019	26	control	CHN	Asia	Young	Asia	QinJ_2012	25.47	male	NA
NOM020	24	control	CHN	Asia	Young	Asia	QinJ_2012	25.21	male	NA
NOM022	23	control	CHN	Asia	Young	Asia	QinJ_2012	26.73	male	NA
NOM023	46	control	CHN	Asia	Middle	Asia	QinJ_2012	27.12	male	NA
NOM025	28	control	CHN	Asia	Young	Asia	QinJ_2012	25.59	male	NA
NOM026	52	control	CHN	Asia	Middle	Asia	QinJ_2012	25.71	male	NA
NOM027	38	control	CHN	Asia	Young	Asia	QinJ_2012	25.71	male	NA
NOM028	47	control	CHN	Asia	Middle	Asia	QinJ_2012	26.57	male	NA
CON-001	21	control	CHN	Asia	Young	Asia	QinJ_2012	26.3	female	NA
CON-002	53	control	CHN	Asia	Middle	Asia	QinJ_2012	26.67	female	NA
CON-003	61	control	CHN	Asia	Elderly	Asia	QinJ_2012	25.07	female	NA
CON-004	55	control	CHN	Asia	Middle	Asia	QinJ_2012	25.39	female	NA
CON-005	53	control	CHN	Asia	Middle	Asia	QinJ_2012	26.67	female	NA
CON-006	52	control	CHN	Asia	Middle	Asia	QinJ_2012	26	female	NA
CON-007	55	control	CHN	Asia	Middle	Asia	QinJ_2012	25.64	female	NA
CON-008	56	control	CHN	Asia	Middle	Asia	QinJ_2012	26.99	female	NA
CON-009	46	control	CHN	Asia	Middle	Asia	QinJ_2012	29.64	female	NA
CON-010	42	control	CHN	Asia	Middle	Asia	QinJ_2012	27.99	female	NA
CON-011	49	control	CHN	Asia	Middle	Asia	QinJ_2012	25.3	female	NA
CON-012	44	control	CHN	Asia	Middle	Asia	QinJ_2012	29.03	female	NA
CON-013	48	control	CHN	Asia	Middle	Asia	QinJ_2012	28.19	female	NA
CON-014	39	control	CHN	Asia	Young	Asia	QinJ_2012	26.35	female	NA
CON-015	42	control	CHN	Asia	Middle	Asia	QinJ_2012	29.17	female	NA
CON-016	28	control	CHN	Asia	Young	Asia	QinJ_2012	26.73	male	NA
CON-017	27	control	CHN	Asia	Young	Asia	QinJ_2012	26.3	male	NA
CON-018	28	control	CHN	Asia	Young	Asia	QinJ_2012	26.83	male	NA
CON-019	48	control	CHN	Asia	Middle	Asia	QinJ_2012	25.4	male	NA
CON-020	40	control	CHN	Asia	Middle	Asia	QinJ_2012	31.4	male	NA
CON-021	57	control	CHN	Asia	Middle	Asia	QinJ_2012	29.38	male	NA
CON-022	53	control	CHN	Asia	Middle	Asia	QinJ_2012	26.77	male	NA
CON-023	50	control	CHN	Asia	Middle	Asia	QinJ_2012	25.6	male	NA
CON-026	40	control	CHN	Asia	Middle	Asia	QinJ_2012	25.56	male	NA
CON-027	45	control	CHN	Asia	Middle	Asia	QinJ_2012	29.27	male	NA
CON-028	53	control	CHN	Asia	Middle	Asia	QinJ_2012	26.9	male	NA
CON-029	54	control	CHN	Asia	Middle	Asia	QinJ_2012	26.78	male	NA
CON-031	56	control	CHN	Asia	Middle	Asia	QinJ_2012	27.64	male	NA
CON-032	26	control	CHN	Asia	Young	Asia	QinJ_2012	16.87	female	NA
CON-033	27	control	CHN	Asia	Young	Asia	QinJ_2012	23.92	female	NA
CON-034	27	control	CHN	Asia	Young	Asia	QinJ_2012	17.26	female	NA
CON-035	27	control	CHN	Asia	Young	Asia	QinJ_2012	17.4	female	NA
CON-036	29	control	CHN	Asia	Young	Asia	QinJ_2012	17.69	female	NA
CON-037	28	control	CHN	Asia	Young	Asia	QinJ_2012	17.29	female	NA
CON-038	27	control	CHN	Asia	Young	Asia	QinJ_2012	18.75	female	NA
CON-039	53	control	CHN	Asia	Middle	Asia	QinJ_2012	23.03	female	NA
CON-040	44	control	CHN	Asia	Middle	Asia	QinJ_2012	24.97	female	NA
CON-041	56	control	CHN	Asia	Middle	Asia	QinJ_2012	19.23	female	NA
CON-042	54	control	CHN	Asia	Middle	Asia	QinJ_2012	19.48	female	NA
CON-043	41	control	CHN	Asia	Middle	Asia	QinJ_2012	17.4	female	NA
CON-044	50	control	CHN	Asia	Middle	Asia	QinJ_2012	21.08	female	NA
CON-045	54	control	CHN	Asia	Middle	Asia	QinJ_2012	22.22	female	NA
CON-046	67	control	CHN	Asia	Elderly	Asia	QinJ_2012	24.34	female	NA
CON-047	45	control	CHN	Asia	Middle	Asia	QinJ_2012	21.08	female	NA
CON-048	52	control	CHN	Asia	Middle	Asia	QinJ_2012	23.81	female	NA
CON-049	58	control	CHN	Asia	Middle	Asia	QinJ_2012	22.06	female	NA
CON-050	60	control	CHN	Asia	Elderly	Asia	QinJ_2012	20.2	female	NA
CON-051	61	control	CHN	Asia	Elderly	Asia	QinJ_2012	23.73	female	NA
CON-052	43	control	CHN	Asia	Middle	Asia	QinJ_2012	16.65	female	NA
CON-053	60	control	CHN	Asia	Elderly	Asia	QinJ_2012	21.33	female	NA
CON-054	52	control	CHN	Asia	Middle	Asia	QinJ_2012	24.84	female	NA
CON-055	56	control	CHN	Asia	Middle	Asia	QinJ_2012	20.81	female	NA
CON-056	50	control	CHN	Asia	Middle	Asia	QinJ_2012	18.31	female	NA
CON-057	41	control	CHN	Asia	Middle	Asia	QinJ_2012	20.69	female	NA
CON-058	47	control	CHN	Asia	Middle	Asia	QinJ_2012	23.83	female	NA
CON-059	49	control	CHN	Asia	Middle	Asia	QinJ_2012	23.92	female	NA
CON-060	44	control	CHN	Asia	Middle	Asia	QinJ_2012	24.14	female	NA
CON-061	48	control	CHN	Asia	Middle	Asia	QinJ_2012	24.06	female	NA
CON-062	47	control	CHN	Asia	Middle	Asia	QinJ_2012	21.64	female	NA
CON-063	35	control	CHN	Asia	Young	Asia	QinJ_2012	24.17	female	NA
CON-064	46	control	CHN	Asia	Middle	Asia	QinJ_2012	22.6	female	NA
CON-065	46	control	CHN	Asia	Middle	Asia	QinJ_2012	21.56	female	NA
CON-066	45	control	CHN	Asia	Middle	Asia	QinJ_2012	22.22	female	NA
CON-067	45	control	CHN	Asia	Middle	Asia	QinJ_2012	22.48	female	NA
CON-068	41	control	CHN	Asia	Middle	Asia	QinJ_2012	21.21	female	NA
CON-069	46	control	CHN	Asia	Middle	Asia	QinJ_2012	22.94	female	NA
CON-070	48	control	CHN	Asia	Middle	Asia	QinJ_2012	24.44	female	NA
CON-071	64	control	CHN	Asia	Elderly	Asia	QinJ_2012	24.86	female	NA
CON-072	41	control	CHN	Asia	Middle	Asia	QinJ_2012	19.05	female	NA
CON-073	46	control	CHN	Asia	Middle	Asia	QinJ_2012	24.77	female	NA
CON-074	41	control	CHN	Asia	Middle	Asia	QinJ_2012	23.28	female	NA
CON-075	34	control	CHN	Asia	Young	Asia	QinJ_2012	22.72	female	NA
CON-076	43	control	CHN	Asia	Middle	Asia	QinJ_2012	19.63	female	NA
CON-077	41	control	CHN	Asia	Middle	Asia	QinJ_2012	23.59	female	NA
CON-078	41	control	CHN	Asia	Middle	Asia	QinJ_2012	22.94	female	NA
CON-079	60	control	CHN	Asia	Elderly	Asia	QinJ_2012	22.81	female	NA
CON-080	56	control	CHN	Asia	Middle	Asia	QinJ_2012	22.04	female	NA
CON-081	52	control	CHN	Asia	Middle	Asia	QinJ_2012	23.88	male	NA
CON-082	53	control	CHN	Asia	Middle	Asia	QinJ_2012	24.61	male	NA
CON-083	60	control	CHN	Asia	Elderly	Asia	QinJ_2012	22.34	male	NA
CON-084	69	control	CHN	Asia	Elderly	Asia	QinJ_2012	20.76	male	NA
CON-085	39	control	CHN	Asia	Young	Asia	QinJ_2012	15.57	male	NA
CON-086	67	control	CHN	Asia	Elderly	Asia	QinJ_2012	24.02	male	NA
CON-087	38	control	CHN	Asia	Young	Asia	QinJ_2012	22.68	male	NA
CON-088	56	control	CHN	Asia	Middle	Asia	QinJ_2012	23.88	male	NA
CON-089	55	control	CHN	Asia	Middle	Asia	QinJ_2012	21.55	male	NA
CON-090	47	control	CHN	Asia	Middle	Asia	QinJ_2012	24.68	male	NA
CON-091	50	control	CHN	Asia	Middle	Asia	QinJ_2012	24.22	male	NA
CON-092	70	control	CHN	Asia	Elderly	Asia	QinJ_2012	24.46	male	NA
CON-093	40	control	CHN	Asia	Middle	Asia	QinJ_2012	20.02	male	NA
CON-095	54	control	CHN	Asia	Middle	Asia	QinJ_2012	23.36	male	NA
CON-096	59	control	CHN	Asia	Middle	Asia	QinJ_2012	20.45	male	NA
CON-097	57	control	CHN	Asia	Middle	Asia	QinJ_2012	24.62	male	NA
CON-098	62	control	CHN	Asia	Elderly	Asia	QinJ_2012	23.43	male	NA
CON-099	55	control	CHN	Asia	Middle	Asia	QinJ_2012	23.36	male	NA
CON-101	42	control	CHN	Asia	Middle	Asia	QinJ_2012	21.34	male	NA
CON-104	55	control	CHN	Asia	Middle	Asia	QinJ_2012	24.61	male	NA
CON-105	52	control	CHN	Asia	Middle	Asia	QinJ_2012	22.22	male	NA
CON-106	46	control	CHN	Asia	Middle	Asia	QinJ_2012	19.72	male	NA
CON-107	44	control	CHN	Asia	Middle	Asia	QinJ_2012	22.49	male	NA
T2D-001	57	T2D	CHN	Asia	Middle	Asia	QinJ_2012	25.72	female	NA
T2D-002	58	T2D	CHN	Asia	Middle	Asia	QinJ_2012	27.22	female	NA
T2D-003	68	T2D	CHN	Asia	Elderly	Asia	QinJ_2012	25.78	female	NA
T2D-004	42	T2D	CHN	Asia	Middle	Asia	QinJ_2012	27.24	female	NA
T2D-005	74	T2D	CHN	Asia	Elderly	Asia	QinJ_2012	26.44	female	NA
T2D-006	73	T2D	CHN	Asia	Elderly	Asia	QinJ_2012	32.02	female	NA
T2D-007	33	T2D	CHN	Asia	Young	Asia	QinJ_2012	27.53	female	NA
T2D-008	65	T2D	CHN	Asia	Elderly	Asia	QinJ_2012	29.07	female	NA
T2D-009	64	T2D	CHN	Asia	Elderly	Asia	QinJ_2012	27.12	female	NA
T2D-010	45	T2D	CHN	Asia	Middle	Asia	QinJ_2012	25.28	female	NA
T2D-011	62	T2D	CHN	Asia	Elderly	Asia	QinJ_2012	26.64	female	NA
T2D-012	72	T2D	CHN	Asia	Elderly	Asia	QinJ_2012	29.03	female	NA
T2D-013	52	T2D	CHN	Asia	Middle	Asia	QinJ_2012	25.2	female	NA
T2D-014	63	T2D	CHN	Asia	Elderly	Asia	QinJ_2012	27.24	female	NA
T2D-015	45	T2D	CHN	Asia	Middle	Asia	QinJ_2012	25.45	female	NA
T2D-016	73	T2D	CHN	Asia	Elderly	Asia	QinJ_2012	28.33	male	NA
T2D-017	48	T2D	CHN	Asia	Middle	Asia	QinJ_2012	27.55	male	NA
T2D-018	46	T2D	CHN	Asia	Middle	Asia	QinJ_2012	28.73	male	NA
T2D-019	43	T2D	CHN	Asia	Middle	Asia	QinJ_2012	26.56	male	NA
T2D-020	44	T2D	CHN	Asia	Middle	Asia	QinJ_2012	33.63	male	NA
T2D-021	49	T2D	CHN	Asia	Middle	Asia	QinJ_2012	26.3	male	NA
T2D-022	58	T2D	CHN	Asia	Middle	Asia	QinJ_2012	27.04	male	NA
T2D-023	40	T2D	CHN	Asia	Middle	Asia	QinJ_2012	25.4	male	NA
T2D-024	58	T2D	CHN	Asia	Middle	Asia	QinJ_2012	25.97	male	NA
T2D-025	24	T2D	CHN	Asia	Young	Asia	QinJ_2012	37.5	male	NA
T2D-026	72	T2D	CHN	Asia	Elderly	Asia	QinJ_2012	26.12	male	NA
T2D-028	57	T2D	CHN	Asia	Middle	Asia	QinJ_2012	25.28	male	NA
T2D-029	71	T2D	CHN	Asia	Elderly	Asia	QinJ_2012	25.16	male	NA
T2D-030	58	T2D	CHN	Asia	Middle	Asia	QinJ_2012	29.41	male	NA
T2D-031	35	T2D	CHN	Asia	Young	Asia	QinJ_2012	27.43	male	NA
T2D-036	70	T2D	CHN	Asia	Elderly	Asia	QinJ_2012	27.44	male	NA
T2D-039	58	T2D	CHN	Asia	Middle	Asia	QinJ_2012	25.16	male	NA
T2D-040	60	T2D	CHN	Asia	Elderly	Asia	QinJ_2012	27.81	male	NA
T2D-041	56	T2D	CHN	Asia	Middle	Asia	QinJ_2012	25.61	male	NA
T2D-042	81	T2D	CHN	Asia	Elderly	Asia	QinJ_2012	27.34	male	NA
T2D-043	55	T2D	CHN	Asia	Middle	Asia	QinJ_2012	26.12	male	NA
T2D-044	51	T2D	CHN	Asia	Middle	Asia	QinJ_2012	27.38	male	NA
T2D-045	33	T2D	CHN	Asia	Young	Asia	QinJ_2012	33.24	male	NA
T2D-046	55	T2D	CHN	Asia	Middle	Asia	QinJ_2012	21.56	female	NA
T2D-047	86	T2D	CHN	Asia	Elderly	Asia	QinJ_2012	23.46	female	NA
T2D-048	28	T2D	CHN	Asia	Young	Asia	QinJ_2012	24.22	female	NA
T2D-049	54	T2D	CHN	Asia	Middle	Asia	QinJ_2012	24.84	female	NA
T2D-050	71	T2D	CHN	Asia	Elderly	Asia	QinJ_2012	22.07	female	NA
T2D-051	50	T2D	CHN	Asia	Middle	Asia	QinJ_2012	24.77	female	NA
T2D-052	71	T2D	CHN	Asia	Elderly	Asia	QinJ_2012	23.74	female	NA
T2D-053	49	T2D	CHN	Asia	Middle	Asia	QinJ_2012	22.04	female	NA
T2D-054	66	T2D	CHN	Asia	Elderly	Asia	QinJ_2012	16.97	female	NA
T2D-055	60	T2D	CHN	Asia	Elderly	Asia	QinJ_2012	19.98	female	NA
T2D-056	64	T2D	CHN	Asia	Elderly	Asia	QinJ_2012	24.61	female	NA
T2D-057	75	T2D	CHN	Asia	Elderly	Asia	QinJ_2012	24.34	female	NA
T2D-058	55	T2D	CHN	Asia	Middle	Asia	QinJ_2012	23.15	female	NA
T2D-059	32	T2D	CHN	Asia	Young	Asia	QinJ_2012	24.88	female	NA
T2D-060	46	T2D	CHN	Asia	Middle	Asia	QinJ_2012	21.48	female	NA
T2D-062	25	T2D	CHN	Asia	Young	Asia	QinJ_2012	17.63	female	NA
T2D-063	54	T2D	CHN	Asia	Middle	Asia	QinJ_2012	18.26	female	NA
T2D-064	54	T2D	CHN	Asia	Middle	Asia	QinJ_2012	23.63	female	NA
T2D-065	58	T2D	CHN	Asia	Middle	Asia	QinJ_2012	21.48	female	NA
T2D-066	61	T2D	CHN	Asia	Elderly	Asia	QinJ_2012	22.89	female	NA
T2D-067	83	T2D	CHN	Asia	Elderly	Asia	QinJ_2012	24.03	female	NA
T2D-068	54	T2D	CHN	Asia	Middle	Asia	QinJ_2012	23.05	female	NA
T2D-069	55	T2D	CHN	Asia	Middle	Asia	QinJ_2012	21.48	female	NA
T2D-070	74	T2D	CHN	Asia	Elderly	Asia	QinJ_2012	18.73	female	NA
T2D-071	46	T2D	CHN	Asia	Middle	Asia	QinJ_2012	22.41	male	NA
T2D-072	43	T2D	CHN	Asia	Middle	Asia	QinJ_2012	23.94	male	NA
T2D-073	39	T2D	CHN	Asia	Young	Asia	QinJ_2012	24.78	male	NA
T2D-074	58	T2D	CHN	Asia	Middle	Asia	QinJ_2012	23.68	male	NA
T2D-075	72	T2D	CHN	Asia	Elderly	Asia	QinJ_2012	20.55	male	NA
T2D-076	57	T2D	CHN	Asia	Middle	Asia	QinJ_2012	21.89	male	NA
T2D-077	51	T2D	CHN	Asia	Middle	Asia	QinJ_2012	21.51	male	NA
T2D-078	81	T2D	CHN	Asia	Elderly	Asia	QinJ_2012	20.57	male	NA
T2D-079	61	T2D	CHN	Asia	Elderly	Asia	QinJ_2012	20.7	male	NA
T2D-080	49	T2D	CHN	Asia	Middle	Asia	QinJ_2012	24.16	male	NA
T2D-081	55	T2D	CHN	Asia	Middle	Asia	QinJ_2012	24.8	male	NA
T2D-082	29	T2D	CHN	Asia	Young	Asia	QinJ_2012	20.42	male	NA
T2D-083	46	T2D	CHN	Asia	Middle	Asia	QinJ_2012	24.8	male	NA
T2D-084	55	T2D	CHN	Asia	Middle	Asia	QinJ_2012	23.51	male	NA
T2D-085	36	T2D	CHN	Asia	Young	Asia	QinJ_2012	22.91	male	NA
T2D-086	60	T2D	CHN	Asia	Elderly	Asia	QinJ_2012	24.68	male	NA
T2D-087	33	T2D	CHN	Asia	Young	Asia	QinJ_2012	23.38	male	NA
T2D-088	71	T2D	CHN	Asia	Elderly	Asia	QinJ_2012	22.13	male	NA
T2D-089	41	T2D	CHN	Asia	Middle	Asia	QinJ_2012	24.16	male	NA
T2D-091	57	T2D	CHN	Asia	Middle	Asia	QinJ_2012	24.39	male	NA
T2D-092	80	T2D	CHN	Asia	Elderly	Asia	QinJ_2012	22.86	male	NA
T2D-093	57	T2D	CHN	Asia	Middle	Asia	QinJ_2012	24.68	male	NA
T2D-094	62	T2D	CHN	Asia	Elderly	Asia	QinJ_2012	22.68	male	NA
T2D-095	37	T2D	CHN	Asia	Young	Asia	QinJ_2012	20.76	male	NA
T2D-096	49	T2D	CHN	Asia	Middle	Asia	QinJ_2012	22.64	male	NA
T2D-097	31	T2D	CHN	Asia	Young	Asia	QinJ_2012	20.52	male	NA
T2D-098	58	T2D	CHN	Asia	Middle	Asia	QinJ_2012	18.25	male	NA
T2D-099	62	T2D	CHN	Asia	Elderly	Asia	QinJ_2012	22.49	male	NA
T2D-100	41	T2D	CHN	Asia	Middle	Asia	QinJ_2012	23.44	male	NA
T2D-101	61	T2D	CHN	Asia	Elderly	Asia	QinJ_2012	17.41	male	NA
T2D-102	44	T2D	CHN	Asia	Middle	Asia	QinJ_2012	23.03	male	NA
T2D-103	65	T2D	CHN	Asia	Elderly	Asia	QinJ_2012	22.86	male	NA
T2D-104	79	T2D	CHN	Asia	Elderly	Asia	QinJ_2012	23.36	male	NA
T2D-105	65	T2D	CHN	Asia	Elderly	Asia	QinJ_2012	24.74	male	NA
T2D-106	63	T2D	CHN	Asia	Elderly	Asia	QinJ_2012	23.67	male	NA
T2D-107	40	T2D	CHN	Asia	Middle	Asia	QinJ_2012	22.23	male	NA
HD-1	40	control	CHN	Asia	Middle	Asia	QinN_2014	20.03	female	1
HD-2	46	control	CHN	Asia	Middle	Asia	QinN_2014	20.83	female	1
HD-3	45	control	CHN	Asia	Middle	Asia	QinN_2014	19.58	male	1
HD-4	38	control	CHN	Asia	Young	Asia	QinN_2014	20.05	male	1
HD-5	43	control	CHN	Asia	Middle	Asia	QinN_2014	22.38	female	1
HD-6	38	control	CHN	Asia	Young	Asia	QinN_2014	21.48	female	1
HD-7	37	control	CHN	Asia	Young	Asia	QinN_2014	21.99	female	1
HD-8	60	control	CHN	Asia	Elderly	Asia	QinN_2014	26.04	female	1
HD-9	39	control	CHN	Asia	Young	Asia	QinN_2014	18.73	female	1
HD-10	40	control	CHN	Asia	Middle	Asia	QinN_2014	20.2	female	1
HD-11	38	control	CHN	Asia	Young	Asia	QinN_2014	19.95	female	1
HD-12	40	control	CHN	Asia	Middle	Asia	QinN_2014	22.55	male	1
HD-13	56	control	CHN	Asia	Middle	Asia	QinN_2014	21.48	female	1
HD-14	51	control	CHN	Asia	Middle	Asia	QinN_2014	22.58	male	1
HD-15	56	control	CHN	Asia	Middle	Asia	QinN_2014	19.81	male	1
HD-16	41	control	CHN	Asia	Middle	Asia	QinN_2014	24.44	female	1
HD-17	46	control	CHN	Asia	Middle	Asia	QinN_2014	23.05	male	1
HD-18	43	control	CHN	Asia	Middle	Asia	QinN_2014	22.31	male	1
HD-19	57	control	CHN	Asia	Middle	Asia	QinN_2014	21.88	male	1
HD-20	45	control	CHN	Asia	Middle	Asia	QinN_2014	22.79	male	1
HD-21	37	control	CHN	Asia	Young	Asia	QinN_2014	22.66	male	1
HD-22	41	control	CHN	Asia	Middle	Asia	QinN_2014	24.44	female	1
HD-23	35	control	CHN	Asia	Young	Asia	QinN_2014	19.22	female	1
HD-24	36	control	CHN	Asia	Young	Asia	QinN_2014	20.7	male	1
HD-25	49	control	CHN	Asia	Middle	Asia	QinN_2014	22.89	female	1
HD-26	40	control	CHN	Asia	Middle	Asia	QinN_2014	20.32	female	1
HD-27	45	control	CHN	Asia	Middle	Asia	QinN_2014	19.94	male	1
HD-28	33	control	CHN	Asia	Young	Asia	QinN_2014	21.29	male	1
HD-29	33	control	CHN	Asia	Young	Asia	QinN_2014	20.31	female	1
HD-30	54	control	CHN	Asia	Middle	Asia	QinN_2014	23.44	female	1
HD-31	43	control	CHN	Asia	Middle	Asia	QinN_2014	22.49	male	1
HD-32	54	control	CHN	Asia	Middle	Asia	QinN_2014	22.72	female	1
HD-33	34	control	CHN	Asia	Young	Asia	QinN_2014	20.57	female	1
HD-34	40	control	CHN	Asia	Middle	Asia	QinN_2014	18.59	female	1
HD-35	48	control	CHN	Asia	Middle	Asia	QinN_2014	23.89	male	1
HD-36	32	control	CHN	Asia	Young	Asia	QinN_2014	20.32	female	1
HD-37	45	control	CHN	Asia	Middle	Asia	QinN_2014	20.17	female	1
HD-38	40	control	CHN	Asia	Middle	Asia	QinN_2014	20.05	male	1
HD-39	51	control	CHN	Asia	Middle	Asia	QinN_2014	22.86	female	1
HD-40	41	control	CHN	Asia	Middle	Asia	QinN_2014	20.57	male	1
HD-41	52	control	CHN	Asia	Middle	Asia	QinN_2014	19.92	male	1
HD-42	50	control	CHN	Asia	Middle	Asia	QinN_2014	25.91	male	1
HD-43	36	control	CHN	Asia	Young	Asia	QinN_2014	19.71	male	1
HD-44	41	control	CHN	Asia	Middle	Asia	QinN_2014	23.92	male	1
HD-45	37	control	CHN	Asia	Young	Asia	QinN_2014	22.4	male	1
HD-46	35	control	CHN	Asia	Young	Asia	QinN_2014	24.06	male	1
HD-47	58	control	CHN	Asia	Middle	Asia	QinN_2014	23.62	male	1
HD-48	31	control	CHN	Asia	Young	Asia	QinN_2014	22.76	male	1
HD-49	41	control	CHN	Asia	Middle	Asia	QinN_2014	20.83	female	1
HD-50	50	control	CHN	Asia	Middle	Asia	QinN_2014	25.2	female	1
HD-51	37	control	CHN	Asia	Young	Asia	QinN_2014	22.86	male	1
HD-52	50	control	CHN	Asia	Middle	Asia	QinN_2014	19.53	female	1
HD-53	50	control	CHN	Asia	Middle	Asia	QinN_2014	20.55	female	1
HD-54	47	control	CHN	Asia	Middle	Asia	QinN_2014	20.76	male	1
HD-55	37	control	CHN	Asia	Young	Asia	QinN_2014	22.04	male	1
HD-56	31	control	CHN	Asia	Young	Asia	QinN_2014	19.03	male	1
HD-57	32	control	CHN	Asia	Young	Asia	QinN_2014	20.9	male	1
HD-58	52	control	CHN	Asia	Middle	Asia	QinN_2014	19.03	male	1
HD-59	23	control	CHN	Asia	Young	Asia	QinN_2014	22.91	female	1
HD-60	34	control	CHN	Asia	Young	Asia	QinN_2014	20.52	male	1
HD-61	31	control	CHN	Asia	Young	Asia	QinN_2014	20.18	male	1
HD-62	62	control	CHN	Asia	Elderly	Asia	QinN_2014	20.58	male	1
HD-63	42	control	CHN	Asia	Middle	Asia	QinN_2014	19.92	female	1
HD-64	29	control	CHN	Asia	Young	Asia	QinN_2014	17.85	female	1
HD-65	43	control	CHN	Asia	Middle	Asia	QinN_2014	24.98	female	1
HD-66	42	control	CHN	Asia	Middle	Asia	QinN_2014	21.75	male	1
HD-67	32	control	CHN	Asia	Young	Asia	QinN_2014	19.24	male	1
HD-68	33	control	CHN	Asia	Young	Asia	QinN_2014	19.59	male	1
HD-69	26	control	CHN	Asia	Young	Asia	QinN_2014	22.73	male	1
HD-70	52	control	CHN	Asia	Middle	Asia	QinN_2014	25.35	male	1
HD-71	36	control	CHN	Asia	Young	Asia	QinN_2014	20.09	female	1
HD-72	47	control	CHN	Asia	Middle	Asia	QinN_2014	22.46	male	1
HD-73	45	control	CHN	Asia	Middle	Asia	QinN_2014	22.63	female	1
HD-74	40	control	CHN	Asia	Middle	Asia	QinN_2014	19.92	female	1
HD-75	35	control	CHN	Asia	Young	Asia	QinN_2014	21.55	male	1
HD-76	54	control	CHN	Asia	Middle	Asia	QinN_2014	24.51	female	1
HD-77	35	control	CHN	Asia	Young	Asia	QinN_2014	24.04	male	1
HD-78	32	control	CHN	Asia	Young	Asia	QinN_2014	17.86	male	1
HD-79	25	control	CHN	Asia	Young	Asia	QinN_2014	20.93	male	1
HD-80	43	control	CHN	Asia	Middle	Asia	QinN_2014	22.95	male	1
HD-81	45	control	CHN	Asia	Middle	Asia	QinN_2014	20.05	male	1
HD-82	58	control	CHN	Asia	Middle	Asia	QinN_2014	21.97	male	1
HD-83	42	control	CHN	Asia	Middle	Asia	QinN_2014	21.62	male	1
LD-1	44	cirrhosis	CHN	Asia	Middle	Asia	QinN_2014	20.76	male	2
LD-2	51	cirrhosis	CHN	Asia	Middle	Asia	QinN_2014	24.54	male	2
LD-3	43	cirrhosis	CHN	Asia	Middle	Asia	QinN_2014	21.28	male	1
LD-4	41	cirrhosis	CHN	Asia	Middle	Asia	QinN_2014	25.06	male	1
LD-5	49	cirrhosis	CHN	Asia	Middle	Asia	QinN_2014	21.22	male	2
LD-6	47	cirrhosis	CHN	Asia	Middle	Asia	QinN_2014	23.73	female	1
LD-7	35	cirrhosis	CHN	Asia	Young	Asia	QinN_2014	24.22	female	1
LD-8	47	cirrhosis	CHN	Asia	Middle	Asia	QinN_2014	22.41	male	2
LD-9	56	cirrhosis	CHN	Asia	Middle	Asia	QinN_2014	21.45	male	2
LD-10	45	cirrhosis	CHN	Asia	Middle	Asia	QinN_2014	24.03	female	2
LD-11	51	cirrhosis	CHN	Asia	Middle	Asia	QinN_2014	23.66	male	2
LD-12	72	cirrhosis	CHN	Asia	Elderly	Asia	QinN_2014	20.93	male	1
LD-13	52	cirrhosis	CHN	Asia	Middle	Asia	QinN_2014	24.06	male	1
LD-14	74	cirrhosis	CHN	Asia	Elderly	Asia	QinN_2014	19.43	female	1
LD-15	49	cirrhosis	CHN	Asia	Middle	Asia	QinN_2014	24.98	male	1
LD-16	49	cirrhosis	CHN	Asia	Middle	Asia	QinN_2014	23.81	male	1
LD-18	55	cirrhosis	CHN	Asia	Middle	Asia	QinN_2014	21.88	female	2
LD-19	44	cirrhosis	CHN	Asia	Middle	Asia	QinN_2014	28.03	male	1
LD-20	45	cirrhosis	CHN	Asia	Middle	Asia	QinN_2014	28.65	male	2
LD-21	53	cirrhosis	CHN	Asia	Middle	Asia	QinN_2014	20.76	male	2
LD-22	55	cirrhosis	CHN	Asia	Middle	Asia	QinN_2014	22.86	female	2
LD-23	36	cirrhosis	CHN	Asia	Young	Asia	QinN_2014	21.26	male	2
LD-24	61	cirrhosis	CHN	Asia	Elderly	Asia	QinN_2014	25.63	female	1
LD-25	59	cirrhosis	CHN	Asia	Middle	Asia	QinN_2014	24.03	female	2
LD-26	38	cirrhosis	CHN	Asia	Young	Asia	QinN_2014	25.88	male	1
LD-27	55	cirrhosis	CHN	Asia	Middle	Asia	QinN_2014	20.2	male	1
LD-28	51	cirrhosis	CHN	Asia	Middle	Asia	QinN_2014	21.48	male	1
LD-29	44	cirrhosis	CHN	Asia	Middle	Asia	QinN_2014	25.51	male	1
LD-30	64	cirrhosis	CHN	Asia	Elderly	Asia	QinN_2014	23.88	male	1
LD-31	48	cirrhosis	CHN	Asia	Middle	Asia	QinN_2014	22.04	male	2
LD-32	62	cirrhosis	CHN	Asia	Elderly	Asia	QinN_2014	26.71	female	2
LD-33	54	cirrhosis	CHN	Asia	Middle	Asia	QinN_2014	21.26	male	1
LD-34	48	cirrhosis	CHN	Asia	Middle	Asia	QinN_2014	26.67	female	1
LD-35	60	cirrhosis	CHN	Asia	Elderly	Asia	QinN_2014	24.98	male	1
LD-36	66	cirrhosis	CHN	Asia	Elderly	Asia	QinN_2014	30.86	male	1
LD-37	36	cirrhosis	CHN	Asia	Young	Asia	QinN_2014	24.22	male	1
LD-38	54	cirrhosis	CHN	Asia	Middle	Asia	QinN_2014	25.46	male	1
LD-39	73	cirrhosis	CHN	Asia	Elderly	Asia	QinN_2014	21.78	female	1
LD-40	47	cirrhosis	CHN	Asia	Middle	Asia	QinN_2014	19.53	female	2
LD-41	47	cirrhosis	CHN	Asia	Middle	Asia	QinN_2014	24.17	female	1
LD-42	59	cirrhosis	CHN	Asia	Middle	Asia	QinN_2014	22.39	male	1
LD-43	56	cirrhosis	CHN	Asia	Middle	Asia	QinN_2014	17.58	female	2
LD-44	60	cirrhosis	CHN	Asia	Elderly	Asia	QinN_2014	19.98	female	2
LD-45	51	cirrhosis	CHN	Asia	Middle	Asia	QinN_2014	22.43	female	2
LD-46	70	cirrhosis	CHN	Asia	Elderly	Asia	QinN_2014	23.18	male	1
LD-47	53	cirrhosis	CHN	Asia	Middle	Asia	QinN_2014	19.23	female	2
LD-48	41	cirrhosis	CHN	Asia	Middle	Asia	QinN_2014	19.03	male	1
LD-49	66	cirrhosis	CHN	Asia	Elderly	Asia	QinN_2014	22.38	female	2
LD-50	45	cirrhosis	CHN	Asia	Middle	Asia	QinN_2014	19.2	female	1
LD-51	46	cirrhosis	CHN	Asia	Middle	Asia	QinN_2014	25.62	male	2
LD-52	37	cirrhosis	CHN	Asia	Young	Asia	QinN_2014	19.1	female	1
LD-53	52	cirrhosis	CHN	Asia	Middle	Asia	QinN_2014	24.49	male	1
LD-54	62	cirrhosis	CHN	Asia	Elderly	Asia	QinN_2014	25.53	male	2
LD-55	39	cirrhosis	CHN	Asia	Young	Asia	QinN_2014	21.63	female	1
LD-56	48	cirrhosis	CHN	Asia	Middle	Asia	QinN_2014	22.65	male	1
LD-57	60	cirrhosis	CHN	Asia	Elderly	Asia	QinN_2014	24.22	male	2
LD-58	32	cirrhosis	CHN	Asia	Young	Asia	QinN_2014	25.1	male	2
LD-59	58	cirrhosis	CHN	Asia	Middle	Asia	QinN_2014	19.56	female	1
LD-60	32	cirrhosis	CHN	Asia	Young	Asia	QinN_2014	24.22	male	1
LD-61	49	cirrhosis	CHN	Asia	Middle	Asia	QinN_2014	21.47	male	1
LD-62	42	cirrhosis	CHN	Asia	Middle	Asia	QinN_2014	25.69	male	1
LD-63	43	cirrhosis	CHN	Asia	Middle	Asia	QinN_2014	19.72	male	1
LD-64	63	cirrhosis	CHN	Asia	Elderly	Asia	QinN_2014	25.39	female	1
LD-65	38	cirrhosis	CHN	Asia	Young	Asia	QinN_2014	21.55	male	2
LD-66	55	cirrhosis	CHN	Asia	Middle	Asia	QinN_2014	22.65	male	1
LD-67	71	cirrhosis	CHN	Asia	Elderly	Asia	QinN_2014	24.34	female	2
LD-68	29	cirrhosis	CHN	Asia	Young	Asia	QinN_2014	20.31	female	2
LD-69	52	cirrhosis	CHN	Asia	Middle	Asia	QinN_2014	29.02	male	2
LD-70	56	cirrhosis	CHN	Asia	Middle	Asia	QinN_2014	20.55	female	2
LD-71	37	cirrhosis	CHN	Asia	Young	Asia	QinN_2014	20.28	male	1
LD-72	50	cirrhosis	CHN	Asia	Middle	Asia	QinN_2014	24.39	male	1
LD-73	42	cirrhosis	CHN	Asia	Middle	Asia	QinN_2014	21.72	male	1
LD-74	43	cirrhosis	CHN	Asia	Middle	Asia	QinN_2014	19.54	female	2
LD-75	44	cirrhosis	CHN	Asia	Middle	Asia	QinN_2014	20.13	female	2
LD-76	37	cirrhosis	CHN	Asia	Young	Asia	QinN_2014	21.97	male	2
LD-77	42	cirrhosis	CHN	Asia	Middle	Asia	QinN_2014	29.03	male	2
LD-78	47	cirrhosis	CHN	Asia	Middle	Asia	QinN_2014	19.81	female	2
LD-79	46	cirrhosis	CHN	Asia	Middle	Asia	QinN_2014	17.93	male	2
LD-80	44	cirrhosis	CHN	Asia	Middle	Asia	QinN_2014	21.8	male	1
LD-81	42	cirrhosis	CHN	Asia	Middle	Asia	QinN_2014	19.72	male	2
LD-82	52	cirrhosis	CHN	Asia	Middle	Asia	QinN_2014	20.72	male	2
LD-83	52	cirrhosis	CHN	Asia	Middle	Asia	QinN_2014	23.12	male	1
LD-84	69	cirrhosis	CHN	Asia	Elderly	Asia	QinN_2014	20.2	male	1
LD-85	46	cirrhosis	CHN	Asia	Middle	Asia	QinN_2014	21.48	male	1
LD-86	58	cirrhosis	CHN	Asia	Middle	Asia	QinN_2014	20.55	female	1
LD-87	36	cirrhosis	CHN	Asia	Young	Asia	QinN_2014	21.61	male	1
LD-88	28	cirrhosis	CHN	Asia	Young	Asia	QinN_2014	25.56	female	2
LD-89	66	cirrhosis	CHN	Asia	Elderly	Asia	QinN_2014	15.94	male	1
LD-90	55	cirrhosis	CHN	Asia	Middle	Asia	QinN_2014	21.45	male	2
LD-91	58	cirrhosis	CHN	Asia	Middle	Asia	QinN_2014	24.24	female	2
LD-92	39	cirrhosis	CHN	Asia	Young	Asia	QinN_2014	24.06	male	2
LD-93	57	cirrhosis	CHN	Asia	Middle	Asia	QinN_2014	21.72	male	2
LD-94	54	cirrhosis	CHN	Asia	Middle	Asia	QinN_2014	21.16	male	1
LD-95	78	cirrhosis	CHN	Asia	Elderly	Asia	QinN_2014	22.66	male	1
LD-96	36	cirrhosis	CHN	Asia	Young	Asia	QinN_2014	20.72	male	2
LD-97	41	cirrhosis	CHN	Asia	Middle	Asia	QinN_2014	20.83	female	2
LD-98	53	cirrhosis	CHN	Asia	Middle	Asia	QinN_2014	23.03	male	2
HV-1	43	control	CHN	Asia	Middle	Asia	QinN_2014	20.94	male	1
HV-2	58	control	CHN	Asia	Middle	Asia	QinN_2014	19.96	male	1
HV-3	46	control	CHN	Asia	Middle	Asia	QinN_2014	21.3	female	1
HV-4	42	control	CHN	Asia	Middle	Asia	QinN_2014	22.04	female	1
HV-5	53	control	CHN	Asia	Middle	Asia	QinN_2014	23.53	male	1
HV-6	45	control	CHN	Asia	Middle	Asia	QinN_2014	23.94	male	1
HV-7	69	control	CHN	Asia	Elderly	Asia	QinN_2014	22.77	male	1
HV-8	34	control	CHN	Asia	Young	Asia	QinN_2014	19.68	female	1
HV-9	37	control	CHN	Asia	Young	Asia	QinN_2014	21.01	male	1
HV-10	45	control	CHN	Asia	Middle	Asia	QinN_2014	20.07	female	1
HV-11	34	control	CHN	Asia	Young	Asia	QinN_2014	22.86	male	1
HV-12	60	control	CHN	Asia	Elderly	Asia	QinN_2014	23.36	male	1
HV-13	70	control	CHN	Asia	Elderly	Asia	QinN_2014	19.97	male	1
HV-14	35	control	CHN	Asia	Young	Asia	QinN_2014	26.89	male	1
HV-15	52	control	CHN	Asia	Middle	Asia	QinN_2014	23.33	male	1
HV-16	34	control	CHN	Asia	Young	Asia	QinN_2014	20.2	female	1
HV-17	45	control	CHN	Asia	Middle	Asia	QinN_2014	19.05	female	1
HV-18	56	control	CHN	Asia	Middle	Asia	QinN_2014	20.91	male	1
HV-19	49	control	CHN	Asia	Middle	Asia	QinN_2014	23.66	male	1
HV-20	30	control	CHN	Asia	Young	Asia	QinN_2014	20.68	male	1
HV-21	27	control	CHN	Asia	Young	Asia	QinN_2014	20.98	male	1
HV-22	32	control	CHN	Asia	Young	Asia	QinN_2014	23.18	male	1
HV-23	38	control	CHN	Asia	Young	Asia	QinN_2014	24.16	male	1
HV-24	49	control	CHN	Asia	Middle	Asia	QinN_2014	25.95	male	1
HV-25	32	control	CHN	Asia	Young	Asia	QinN_2014	22.94	male	1
HV-26	32	control	CHN	Asia	Young	Asia	QinN_2014	20.42	female	1
HV-27	35	control	CHN	Asia	Young	Asia	QinN_2014	25.19	male	1
HV-28	51	control	CHN	Asia	Middle	Asia	QinN_2014	19.76	male	1
HV-29	54	control	CHN	Asia	Middle	Asia	QinN_2014	22.96	male	1
HV-30	39	control	CHN	Asia	Young	Asia	QinN_2014	24.27	male	1
HV-31	47	control	CHN	Asia	Middle	Asia	QinN_2014	20.05	male	1
LV-1	42	cirrhosis	CHN	Asia	Middle	Asia	QinN_2014	19.03	male	1
LV-2	36	cirrhosis	CHN	Asia	Young	Asia	QinN_2014	24.24	female	1
LV-3	44	cirrhosis	CHN	Asia	Middle	Asia	QinN_2014	25.14	male	2
LV-4	41	cirrhosis	CHN	Asia	Middle	Asia	QinN_2014	25.35	male	2
LV-5	40	cirrhosis	CHN	Asia	Middle	Asia	QinN_2014	22.58	male	2
LV-6	42	cirrhosis	CHN	Asia	Middle	Asia	QinN_2014	21.87	male	1
LV-7	42	cirrhosis	CHN	Asia	Middle	Asia	QinN_2014	19.96	male	2
LV-8	65	cirrhosis	CHN	Asia	Elderly	Asia	QinN_2014	35.16	male	2
LV-9	61	cirrhosis	CHN	Asia	Elderly	Asia	QinN_2014	24.82	male	1
LV-10	62	cirrhosis	CHN	Asia	Elderly	Asia	QinN_2014	24.03	female	1
LV-11	66	cirrhosis	CHN	Asia	Elderly	Asia	QinN_2014	25.1	male	1
LV-12	47	cirrhosis	CHN	Asia	Middle	Asia	QinN_2014	27.44	male	1
LV-13	32	cirrhosis	CHN	Asia	Young	Asia	QinN_2014	31.14	male	1
LV-14	45	cirrhosis	CHN	Asia	Middle	Asia	QinN_2014	21.63	male	2
LV-15	34	cirrhosis	CHN	Asia	Young	Asia	QinN_2014	23.31	female	1
LV-16	68	cirrhosis	CHN	Asia	Elderly	Asia	QinN_2014	27.77	female	2
LV-17	61	cirrhosis	CHN	Asia	Elderly	Asia	QinN_2014	18.73	male	1
LV-18	45	cirrhosis	CHN	Asia	Middle	Asia	QinN_2014	23.45	male	1
LV-19	41	cirrhosis	CHN	Asia	Middle	Asia	QinN_2014	21.22	male	2
LV-20	76	cirrhosis	CHN	Asia	Elderly	Asia	QinN_2014	20.28	male	1
LV-21	49	cirrhosis	CHN	Asia	Middle	Asia	QinN_2014	22.89	female	2
LV-22	52	cirrhosis	CHN	Asia	Middle	Asia	QinN_2014	22.48	female	1
LV-23	48	cirrhosis	CHN	Asia	Middle	Asia	QinN_2014	22.84	male	2
LV-24	60	cirrhosis	CHN	Asia	Elderly	Asia	QinN_2014	19.57	male	1
LV-25	59	cirrhosis	CHN	Asia	Middle	Asia	QinN_2014	20.76	male	1
H1	43	control	TZA	Other	Middle	Other	RampelliS_2015	NA	female	NA
H2	37	control	TZA	Other	Young	Other	RampelliS_2015	NA	male	NA
H3	22	control	TZA	Other	Young	Other	RampelliS_2015	NA	male	NA
H4	24	control	TZA	Other	Young	Other	RampelliS_2015	NA	male	NA
H5	70	control	TZA	Other	Elderly	Other	RampelliS_2015	NA	female	NA
H6	30	control	TZA	Other	Young	Other	RampelliS_2015	NA	male	NA
H7	38	control	TZA	Other	Young	Other	RampelliS_2015	NA	female	NA
H8	20	control	TZA	Other	Young	Other	RampelliS_2015	NA	female	NA
H9	47	control	TZA	Other	Middle	Other	RampelliS_2015	NA	female	NA
H10	40	control	TZA	Other	Middle	Other	RampelliS_2015	NA	female	NA
H11	29	control	TZA	Other	Young	Other	RampelliS_2015	NA	female	NA
H13	34	control	TZA	Other	Young	Other	RampelliS_2015	NA	male	NA
H14	30	control	TZA	Other	Young	Other	RampelliS_2015	NA	male	NA
H16	21	control	TZA	Other	Young	Other	RampelliS_2015	NA	male	NA
H17	23	control	TZA	Other	Young	Other	RampelliS_2015	NA	male	NA
H21	43	control	TZA	Other	Middle	Other	RampelliS_2015	NA	male	NA
H22	38	control	TZA	Other	Young	Other	RampelliS_2015	NA	male	NA
H23	24	control	TZA	Other	Young	Other	RampelliS_2015	NA	male	NA
H24	65	control	TZA	Other	Elderly	Other	RampelliS_2015	NA	male	NA
H25	40	control	TZA	Other	Middle	Other	RampelliS_2015	NA	male	NA
H26	48	control	TZA	Other	Middle	Other	RampelliS_2015	NA	male	NA
H27	29	control	TZA	Other	Young	Other	RampelliS_2015	NA	female	NA
IT1	38	control	ITA	EU	Young	EU	RampelliS_2015	NA	male	NA
IT2	34	control	ITA	EU	Young	EU	RampelliS_2015	NA	female	NA
IT3	29	control	ITA	EU	Young	EU	RampelliS_2015	NA	female	NA
IT4	27	control	ITA	EU	Young	EU	RampelliS_2015	NA	male	NA
IT5	30	control	ITA	EU	Young	EU	RampelliS_2015	NA	male	NA
IT6	32	control	ITA	EU	Young	EU	RampelliS_2015	NA	female	NA
IT7	25	control	ITA	EU	Young	EU	RampelliS_2015	NA	female	NA
IT8	34	control	ITA	EU	Young	EU	RampelliS_2015	NA	male	NA
IT11	40	control	ITA	EU	Middle	EU	RampelliS_2015	NA	female	NA
IT13	30	control	ITA	EU	Young	EU	RampelliS_2015	NA	female	NA
IT14	21	control	ITA	EU	Young	EU	RampelliS_2015	NA	female	NA
P1E0	29	control	CAN	NorthAmerica	Young	NorthAmerica	RaymondF_2016	22.16	male	1
P2E0	31	control	CAN	NorthAmerica	Young	NorthAmerica	RaymondF_2016	22.55	male	1
P3E0	26	control	CAN	NorthAmerica	Young	NorthAmerica	RaymondF_2016	19.03	female	1
P4E0	30	control	CAN	NorthAmerica	Young	NorthAmerica	RaymondF_2016	29.04	male	1
P5E0	22	control	CAN	NorthAmerica	Young	NorthAmerica	RaymondF_2016	24.72	male	1
P6C0	21	control	CAN	NorthAmerica	Young	NorthAmerica	RaymondF_2016	23.74	female	1
P7C0	23	control	CAN	NorthAmerica	Young	NorthAmerica	RaymondF_2016	23.73	female	1
P8C0	26	control	CAN	NorthAmerica	Young	NorthAmerica	RaymondF_2016	20.36	male	1
P9E0	25	control	CAN	NorthAmerica	Young	NorthAmerica	RaymondF_2016	24.3	male	1
P10E0	22	control	CAN	NorthAmerica	Young	NorthAmerica	RaymondF_2016	24	female	1
P11E0	23	control	CAN	NorthAmerica	Young	NorthAmerica	RaymondF_2016	22.92	male	1
P12E0	23	control	CAN	NorthAmerica	Young	NorthAmerica	RaymondF_2016	24.46	female	1
P13E0	21	control	CAN	NorthAmerica	Young	NorthAmerica	RaymondF_2016	29.76	female	1
P14E0	22	control	CAN	NorthAmerica	Young	NorthAmerica	RaymondF_2016	28.83	male	1
P15E0	24	control	CAN	NorthAmerica	Young	NorthAmerica	RaymondF_2016	26.43	female	1
P17E0	26	control	CAN	NorthAmerica	Young	NorthAmerica	RaymondF_2016	23.43	male	1
P18E0	23	control	CAN	NorthAmerica	Young	NorthAmerica	RaymondF_2016	24.35	female	1
P19E0	25	control	CAN	NorthAmerica	Young	NorthAmerica	RaymondF_2016	24.61	male	1
P20E0	22	control	CAN	NorthAmerica	Young	NorthAmerica	RaymondF_2016	23.15	female	1
P21E0	31	control	CAN	NorthAmerica	Young	NorthAmerica	RaymondF_2016	22.41	female	1
P22E0	35	control	CAN	NorthAmerica	Young	NorthAmerica	RaymondF_2016	25.33	female	1
P23C0	24	control	CAN	NorthAmerica	Young	NorthAmerica	RaymondF_2016	19.21	female	1
P25C0	23	control	CAN	NorthAmerica	Young	NorthAmerica	RaymondF_2016	22.32	female	1
P38C0	32	control	CAN	NorthAmerica	Young	NorthAmerica	RaymondF_2016	24.39	male	1
P1E7	29	control	CAN	NorthAmerica	Young	NorthAmerica	RaymondF_2016	22.16	male	2
P2E7	31	control	CAN	NorthAmerica	Young	NorthAmerica	RaymondF_2016	22.55	male	2
P3E7	26	control	CAN	NorthAmerica	Young	NorthAmerica	RaymondF_2016	19.03	female	2
P4E7	30	control	CAN	NorthAmerica	Young	NorthAmerica	RaymondF_2016	29.04	male	2
P5E7	22	control	CAN	NorthAmerica	Young	NorthAmerica	RaymondF_2016	24.72	male	2
P6C7	21	control	CAN	NorthAmerica	Young	NorthAmerica	RaymondF_2016	23.74	female	1
P7C7	23	control	CAN	NorthAmerica	Young	NorthAmerica	RaymondF_2016	23.73	female	1
P8C7	26	control	CAN	NorthAmerica	Young	NorthAmerica	RaymondF_2016	20.36	male	1
P9E7	25	control	CAN	NorthAmerica	Young	NorthAmerica	RaymondF_2016	24.3	male	2
P10E7	22	control	CAN	NorthAmerica	Young	NorthAmerica	RaymondF_2016	24	female	2
P11E7	23	control	CAN	NorthAmerica	Young	NorthAmerica	RaymondF_2016	22.92	male	2
P12E7	23	control	CAN	NorthAmerica	Young	NorthAmerica	RaymondF_2016	24.46	female	2
P13E7	21	control	CAN	NorthAmerica	Young	NorthAmerica	RaymondF_2016	29.76	female	2
P14E7	22	control	CAN	NorthAmerica	Young	NorthAmerica	RaymondF_2016	28.83	male	2
P15E7	24	control	CAN	NorthAmerica	Young	NorthAmerica	RaymondF_2016	26.43	female	2
P17E7	26	control	CAN	NorthAmerica	Young	NorthAmerica	RaymondF_2016	23.43	male	2
P18E7	23	control	CAN	NorthAmerica	Young	NorthAmerica	RaymondF_2016	24.35	female	2
P19E7	25	control	CAN	NorthAmerica	Young	NorthAmerica	RaymondF_2016	24.61	male	2
P20E7	22	control	CAN	NorthAmerica	Young	NorthAmerica	RaymondF_2016	23.15	female	2
P21E7	31	control	CAN	NorthAmerica	Young	NorthAmerica	RaymondF_2016	22.41	female	2
P22E7	35	control	CAN	NorthAmerica	Young	NorthAmerica	RaymondF_2016	25.33	female	2
P23C7	24	control	CAN	NorthAmerica	Young	NorthAmerica	RaymondF_2016	19.21	female	1
P25C7	23	control	CAN	NorthAmerica	Young	NorthAmerica	RaymondF_2016	22.32	female	1
P38C7	32	control	CAN	NorthAmerica	Young	NorthAmerica	RaymondF_2016	24.39	male	1
P1E90	29	control	CAN	NorthAmerica	Young	NorthAmerica	RaymondF_2016	22.16	male	2
P2E90	31	control	CAN	NorthAmerica	Young	NorthAmerica	RaymondF_2016	22.55	male	2
P3E90	26	control	CAN	NorthAmerica	Young	NorthAmerica	RaymondF_2016	19.03	female	2
P4E90	30	control	CAN	NorthAmerica	Young	NorthAmerica	RaymondF_2016	29.04	male	2
P5E90	22	control	CAN	NorthAmerica	Young	NorthAmerica	RaymondF_2016	24.72	male	2
P6C90	21	control	CAN	NorthAmerica	Young	NorthAmerica	RaymondF_2016	23.74	female	1
P7C90	23	control	CAN	NorthAmerica	Young	NorthAmerica	RaymondF_2016	23.73	female	1
P8C90	26	control	CAN	NorthAmerica	Young	NorthAmerica	RaymondF_2016	20.36	male	1
P9E90	25	control	CAN	NorthAmerica	Young	NorthAmerica	RaymondF_2016	24.3	male	2
P10E90	22	control	CAN	NorthAmerica	Young	NorthAmerica	RaymondF_2016	24	female	2
P11E90	23	control	CAN	NorthAmerica	Young	NorthAmerica	RaymondF_2016	22.92	male	2
P12E90	23	control	CAN	NorthAmerica	Young	NorthAmerica	RaymondF_2016	24.46	female	2
P13E90	21	control	CAN	NorthAmerica	Young	NorthAmerica	RaymondF_2016	29.76	female	2
P14E90	22	control	CAN	NorthAmerica	Young	NorthAmerica	RaymondF_2016	28.83	male	2
P15E90	24	control	CAN	NorthAmerica	Young	NorthAmerica	RaymondF_2016	26.43	female	2
P17E90	26	control	CAN	NorthAmerica	Young	NorthAmerica	RaymondF_2016	23.43	male	2
P18E90	23	control	CAN	NorthAmerica	Young	NorthAmerica	RaymondF_2016	24.35	female	2
P19E90	25	control	CAN	NorthAmerica	Young	NorthAmerica	RaymondF_2016	24.61	male	2
P20E90	22	control	CAN	NorthAmerica	Young	NorthAmerica	RaymondF_2016	23.15	female	2
P21E90	31	control	CAN	NorthAmerica	Young	NorthAmerica	RaymondF_2016	22.41	female	2
P22E90	35	control	CAN	NorthAmerica	Young	NorthAmerica	RaymondF_2016	25.33	female	2
P23C90	24	control	CAN	NorthAmerica	Young	NorthAmerica	RaymondF_2016	19.21	female	1
P25C90	23	control	CAN	NorthAmerica	Young	NorthAmerica	RaymondF_2016	22.32	female	1
P38C90	32	control	CAN	NorthAmerica	Young	NorthAmerica	RaymondF_2016	24.39	male	1
G89259	64	control	NLD	EU	Elderly	EU	SchirmerM_2016	23.05	female	1
G89262	66	control	NLD	EU	Elderly	EU	SchirmerM_2016	24.68	female	1
G89260	21	control	NLD	EU	Young	EU	SchirmerM_2016	25.31	female	1
G89274	20	control	NLD	EU	Young	EU	SchirmerM_2016	21.14	female	1
G88993	20	control	NLD	EU	Young	EU	SchirmerM_2016	21.48	male	1
G89268	54	control	NLD	EU	Middle	EU	SchirmerM_2016	28.09	male	1
G89272	23	control	NLD	EU	Young	EU	SchirmerM_2016	22.12	male	1
G89250	22	control	NLD	EU	Young	EU	SchirmerM_2016	22.03	female	1
G88997	22	control	NLD	EU	Young	EU	SchirmerM_2016	23.25	female	1
G89271	24	control	NLD	EU	Young	EU	SchirmerM_2016	22.16	male	1
G89275	20	control	NLD	EU	Young	EU	SchirmerM_2016	26.25	male	1
G88964	54	control	NLD	EU	Middle	EU	SchirmerM_2016	28.08	male	1
G89267	25	control	NLD	EU	Young	EU	SchirmerM_2016	21.91	female	1
G89251	64	control	NLD	EU	Elderly	EU	SchirmerM_2016	28.34	female	1
G89265	28	control	NLD	EU	Young	EU	SchirmerM_2016	34.42	male	1
G89269	22	control	NLD	EU	Young	EU	SchirmerM_2016	20.15	female	1
G88994	28	control	NLD	EU	Young	EU	SchirmerM_2016	23.25	male	1
G88998	23	control	NLD	EU	Young	EU	SchirmerM_2016	21.75	male	1
G89273	20	control	NLD	EU	Young	EU	SchirmerM_2016	18.52	female	1
G88718	22	control	NLD	EU	Young	EU	SchirmerM_2016	21.68	male	1
G88792	25	control	NLD	EU	Young	EU	SchirmerM_2016	24.61	female	1
G88892	25	control	NLD	EU	Young	EU	SchirmerM_2016	19.83	female	1
G88844	21	control	NLD	EU	Young	EU	SchirmerM_2016	20.75	male	1
G88738	26	control	NLD	EU	Young	EU	SchirmerM_2016	21.01	female	1
G89147	20	control	NLD	EU	Young	EU	SchirmerM_2016	22.77	female	1
G88895	25	control	NLD	EU	Young	EU	SchirmerM_2016	20.2	male	1
G90573	27	control	NLD	EU	Young	EU	SchirmerM_2016	NA	male	1
G88894	27	control	NLD	EU	Young	EU	SchirmerM_2016	22.65	female	1
G89187	27	control	NLD	EU	Young	EU	SchirmerM_2016	20.31	female	1
G89195	24	control	NLD	EU	Young	EU	SchirmerM_2016	20.66	female	1
G88856	24	control	NLD	EU	Young	EU	SchirmerM_2016	20.69	female	1
G89190	20	control	NLD	EU	Young	EU	SchirmerM_2016	NA	female	1
G88712	32	control	NLD	EU	Young	EU	SchirmerM_2016	28.05	male	1
G88896	24	control	NLD	EU	Young	EU	SchirmerM_2016	19.92	female	1
G88726	20	control	NLD	EU	Young	EU	SchirmerM_2016	24.81	male	1
G88722	22	control	NLD	EU	Young	EU	SchirmerM_2016	21.56	female	1
G88728	26	control	NLD	EU	Young	EU	SchirmerM_2016	26.03	male	1
G88798	27	control	NLD	EU	Young	EU	SchirmerM_2016	NA	male	1
G88855	24	control	NLD	EU	Young	EU	SchirmerM_2016	22.92	male	1
G88854	20	control	NLD	EU	Young	EU	SchirmerM_2016	19.61	male	1
G88734	23	control	NLD	EU	Young	EU	SchirmerM_2016	NA	female	1
G88724	20	control	NLD	EU	Young	EU	SchirmerM_2016	22.53	female	1
G89136	21	control	NLD	EU	Young	EU	SchirmerM_2016	NA	male	1
G88737	20	control	NLD	EU	Young	EU	SchirmerM_2016	24.03	female	1
G88873	50	control	NLD	EU	Middle	EU	SchirmerM_2016	23.05	female	1
G89182	21	control	NLD	EU	Young	EU	SchirmerM_2016	21.22	female	1
G90576	21	control	NLD	EU	Young	EU	SchirmerM_2016	20.11	female	1
G88729	23	control	NLD	EU	Young	EU	SchirmerM_2016	23.04	male	1
G88793	22	control	NLD	EU	Young	EU	SchirmerM_2016	19.96	female	1
G88732	20	control	NLD	EU	Young	EU	SchirmerM_2016	20.96	female	1
G88736	21	control	NLD	EU	Young	EU	SchirmerM_2016	28.91	female	1
G88866	22	control	NLD	EU	Young	EU	SchirmerM_2016	22.94	male	1
G88849	24	control	NLD	EU	Young	EU	SchirmerM_2016	21.67	female	1
G88794	24	control	NLD	EU	Young	EU	SchirmerM_2016	25.71	male	1
G88723	61	control	NLD	EU	Elderly	EU	SchirmerM_2016	19.62	male	1
G88797	30	control	NLD	EU	Young	EU	SchirmerM_2016	23.96	male	1
G89132	25	control	NLD	EU	Young	EU	SchirmerM_2016	19.61	female	1
G88795	26	control	NLD	EU	Young	EU	SchirmerM_2016	22.72	male	1
G89148	22	control	NLD	EU	Young	EU	SchirmerM_2016	20.2	female	1
G88796	21	control	NLD	EU	Young	EU	SchirmerM_2016	20.44	female	1
G89164	33	control	NLD	EU	Young	EU	SchirmerM_2016	23.04	male	1
G88870	36	control	NLD	EU	Young	EU	SchirmerM_2016	24.45	male	1
G88861	23	control	NLD	EU	Young	EU	SchirmerM_2016	21.8	male	1
G88851	24	control	NLD	EU	Young	EU	SchirmerM_2016	22.72	female	1
G88859	23	control	NLD	EU	Young	EU	SchirmerM_2016	20.55	female	1
G89154	25	control	NLD	EU	Young	EU	SchirmerM_2016	20.06	female	1
G88721	27	control	NLD	EU	Young	EU	SchirmerM_2016	24.11	male	1
G88863	24	control	NLD	EU	Young	EU	SchirmerM_2016	22	male	1
G88848	26	control	NLD	EU	Young	EU	SchirmerM_2016	20.24	female	1
G88731	27	control	NLD	EU	Young	EU	SchirmerM_2016	24.46	female	1
G88811	24	control	NLD	EU	Young	EU	SchirmerM_2016	20.94	female	1
G88845	20	control	NLD	EU	Young	EU	SchirmerM_2016	19.49	female	1
G88864	23	control	NLD	EU	Young	EU	SchirmerM_2016	24.52	female	1
G88858	26	control	NLD	EU	Young	EU	SchirmerM_2016	20.66	male	1
G88847	29	control	NLD	EU	Young	EU	SchirmerM_2016	26.28	male	1
G89126	26	control	NLD	EU	Young	EU	SchirmerM_2016	21.45	female	1
G88852	24	control	NLD	EU	Young	EU	SchirmerM_2016	29.15	male	1
G88853	28	control	NLD	EU	Young	EU	SchirmerM_2016	22.09	female	1
G89161	65	control	NLD	EU	Elderly	EU	SchirmerM_2016	24.69	male	1
G89151	21	control	NLD	EU	Young	EU	SchirmerM_2016	19.97	male	1
G89145	25	control	NLD	EU	Young	EU	SchirmerM_2016	21.94	male	1
G89158	24	control	NLD	EU	Young	EU	SchirmerM_2016	21.38	female	1
G89166	37	control	NLD	EU	Young	EU	SchirmerM_2016	22.84	male	1
G89156	24	control	NLD	EU	Young	EU	SchirmerM_2016	23.24	female	1
G88846	23	control	NLD	EU	Young	EU	SchirmerM_2016	20.59	male	1
G89162	24	control	NLD	EU	Young	EU	SchirmerM_2016	24.02	male	1
G88842	33	control	NLD	EU	Young	EU	SchirmerM_2016	21.22	male	1
G89157	33	control	NLD	EU	Young	EU	SchirmerM_2016	18.51	female	1
G89146	60	control	NLD	EU	Elderly	EU	SchirmerM_2016	25.5	male	1
G89150	24	control	NLD	EU	Young	EU	SchirmerM_2016	23.18	female	1
G88813	23	control	NLD	EU	Young	EU	SchirmerM_2016	24.05	male	1
G88820	21	control	NLD	EU	Young	EU	SchirmerM_2016	24.57	male	1
G88819	22	control	NLD	EU	Young	EU	SchirmerM_2016	25.46	male	1
G89153	22	control	NLD	EU	Young	EU	SchirmerM_2016	22.84	male	1
G88826	21	control	NLD	EU	Young	EU	SchirmerM_2016	24.22	female	1
G88821	23	control	NLD	EU	Young	EU	SchirmerM_2016	22.2	male	1
G89141	23	control	NLD	EU	Young	EU	SchirmerM_2016	23.03	male	1
G89165	23	control	NLD	EU	Young	EU	SchirmerM_2016	20.48	female	1
G89200	69	control	NLD	EU	Elderly	EU	SchirmerM_2016	23.88	male	1
G88806	23	control	NLD	EU	Young	EU	SchirmerM_2016	24.21	female	1
G88804	69	control	NLD	EU	Elderly	EU	SchirmerM_2016	21.93	male	1
G88831	20	control	NLD	EU	Young	EU	SchirmerM_2016	21.97	female	1
G89127	20	control	NLD	EU	Young	EU	SchirmerM_2016	25.28	female	1
G89149	22	control	NLD	EU	Young	EU	SchirmerM_2016	20.5	female	1
G88830	22	control	NLD	EU	Young	EU	SchirmerM_2016	20.69	female	1
G88823	26	control	NLD	EU	Young	EU	SchirmerM_2016	21.09	female	1
G89155	23	control	NLD	EU	Young	EU	SchirmerM_2016	20.81	female	1
G89176	23	control	NLD	EU	Young	EU	SchirmerM_2016	18.04	female	1
G89123	55	control	NLD	EU	Middle	EU	SchirmerM_2016	28.98	female	1
G88782	28	control	NLD	EU	Young	EU	SchirmerM_2016	22.63	male	1
G88783	56	control	NLD	EU	Middle	EU	SchirmerM_2016	24.54	male	1
G88725	22	control	NLD	EU	Young	EU	SchirmerM_2016	23.89	female	1
G88778	21	control	NLD	EU	Young	EU	SchirmerM_2016	22.6	female	1
G88785	29	control	NLD	EU	Young	EU	SchirmerM_2016	21.45	female	1
G88879	24	control	NLD	EU	Young	EU	SchirmerM_2016	27.44	male	1
G88748	25	control	NLD	EU	Young	EU	SchirmerM_2016	21.99	female	1
G88878	21	control	NLD	EU	Young	EU	SchirmerM_2016	20.37	female	1
G88877	26	control	NLD	EU	Young	EU	SchirmerM_2016	24.07	male	1
G88883	21	control	NLD	EU	Young	EU	SchirmerM_2016	23.14	female	1
G88786	23	control	NLD	EU	Young	EU	SchirmerM_2016	22.22	male	1
G88787	25	control	NLD	EU	Young	EU	SchirmerM_2016	23.57	male	1
G88784	53	control	NLD	EU	Middle	EU	SchirmerM_2016	21.8	female	1
G88884	25	control	NLD	EU	Young	EU	SchirmerM_2016	33.02	female	1
G88740	21	control	NLD	EU	Young	EU	SchirmerM_2016	24.98	male	1
G88862	23	control	NLD	EU	Young	EU	SchirmerM_2016	24.25	female	1
G88881	23	control	NLD	EU	Young	EU	SchirmerM_2016	20.52	female	1
G89185	21	control	NLD	EU	Young	EU	SchirmerM_2016	19.29	female	1
G88889	22	control	NLD	EU	Young	EU	SchirmerM_2016	23.74	female	1
G88880	24	control	NLD	EU	Young	EU	SchirmerM_2016	22.09	male	1
G88814	20	control	NLD	EU	Young	EU	SchirmerM_2016	23.18	female	1
G88888	21	control	NLD	EU	Young	EU	SchirmerM_2016	24.61	female	1
G88746	23	control	NLD	EU	Young	EU	SchirmerM_2016	23.84	male	1
G88711	22	control	NLD	EU	Young	EU	SchirmerM_2016	21.6	male	1
G89189	24	control	NLD	EU	Young	EU	SchirmerM_2016	22.99	male	1
G88890	22	control	NLD	EU	Young	EU	SchirmerM_2016	NA	female	1
G88791	31	control	NLD	EU	Young	EU	SchirmerM_2016	26.31	male	1
G88893	20	control	NLD	EU	Young	EU	SchirmerM_2016	20.32	female	1
G88882	25	control	NLD	EU	Young	EU	SchirmerM_2016	25.46	male	1
G88886	23	control	NLD	EU	Young	EU	SchirmerM_2016	23.23	male	1
G88788	23	control	NLD	EU	Young	EU	SchirmerM_2016	NA	female	1
G88801	23	control	NLD	EU	Young	EU	SchirmerM_2016	22.25	male	1
G88885	21	control	NLD	EU	Young	EU	SchirmerM_2016	21.46	male	1
G88869	65	control	NLD	EU	Elderly	EU	SchirmerM_2016	20.83	female	1
G89106	23	control	NLD	EU	Young	EU	SchirmerM_2016	22.32	female	1
G89109	23	control	NLD	EU	Young	EU	SchirmerM_2016	19.37	male	1
G88838	22	control	NLD	EU	Young	EU	SchirmerM_2016	21.05	female	1
G89107	23	control	NLD	EU	Young	EU	SchirmerM_2016	18.94	female	1
G89197	24	control	NLD	EU	Young	EU	SchirmerM_2016	23.23	female	1
G89124	22	control	NLD	EU	Young	EU	SchirmerM_2016	22.32	female	1
G89196	21	control	NLD	EU	Young	EU	SchirmerM_2016	20.23	male	1
G89138	22	control	NLD	EU	Young	EU	SchirmerM_2016	21.22	female	1
G88834	20	control	NLD	EU	Young	EU	SchirmerM_2016	23.3	male	1
G89088	59	control	NLD	EU	Middle	EU	SchirmerM_2016	20.28	female	1
G89159	24	control	NLD	EU	Young	EU	SchirmerM_2016	19.84	female	1
G89112	22	control	NLD	EU	Young	EU	SchirmerM_2016	20.72	female	1
G89122	22	control	NLD	EU	Young	EU	SchirmerM_2016	20.96	female	1
G89174	24	control	NLD	EU	Young	EU	SchirmerM_2016	21.22	male	1
G88749	21	control	NLD	EU	Young	EU	SchirmerM_2016	22.77	female	1
G89089	20	control	NLD	EU	Young	EU	SchirmerM_2016	19.72	female	1
G89108	20	control	NLD	EU	Young	EU	SchirmerM_2016	18.34	female	1
G89130	21	control	NLD	EU	Young	EU	SchirmerM_2016	23.78	female	1
G88872	65	control	NLD	EU	Elderly	EU	SchirmerM_2016	25.77	male	1
G89091	69	control	NLD	EU	Elderly	EU	SchirmerM_2016	24.61	female	1
G89098	70	control	NLD	EU	Elderly	EU	SchirmerM_2016	25.39	male	1
G88810	26	control	NLD	EU	Young	EU	SchirmerM_2016	20.83	male	1
G89134	21	control	NLD	EU	Young	EU	SchirmerM_2016	25.08	male	1
G88808	27	control	NLD	EU	Young	EU	SchirmerM_2016	21.11	female	1
G88839	21	control	NLD	EU	Young	EU	SchirmerM_2016	23.89	male	1
G88837	20	control	NLD	EU	Young	EU	SchirmerM_2016	22.86	female	1
G89139	21	control	NLD	EU	Young	EU	SchirmerM_2016	26.85	female	1
G89117	27	control	NLD	EU	Young	EU	SchirmerM_2016	22.28	female	1
G88812	22	control	NLD	EU	Young	EU	SchirmerM_2016	17.92	male	1
G88828	31	control	NLD	EU	Young	EU	SchirmerM_2016	21.63	female	1
G89167	34	control	NLD	EU	Young	EU	SchirmerM_2016	21.46	female	1
G88836	21	control	NLD	EU	Young	EU	SchirmerM_2016	24.16	female	1
G89198	49	control	NLD	EU	Middle	EU	SchirmerM_2016	20.57	female	1
G89046	29	control	NLD	EU	Young	EU	SchirmerM_2016	20.6	male	1
G89175	20	control	NLD	EU	Young	EU	SchirmerM_2016	24.86	male	1
G89171	25	control	NLD	EU	Young	EU	SchirmerM_2016	21.74	male	1
G89253	55	control	NLD	EU	Middle	EU	SchirmerM_2016	24.28	male	1
G89173	26	control	NLD	EU	Young	EU	SchirmerM_2016	23.03	male	1
G88816	23	control	NLD	EU	Young	EU	SchirmerM_2016	30.07	male	1
G88992	21	control	NLD	EU	Young	EU	SchirmerM_2016	21.68	male	1
G89087	24	control	NLD	EU	Young	EU	SchirmerM_2016	24.54	male	1
G89144	20	control	NLD	EU	Young	EU	SchirmerM_2016	20.11	female	1
G88835	27	control	NLD	EU	Young	EU	SchirmerM_2016	21.9	male	1
G89092	58	control	NLD	EU	Middle	EU	SchirmerM_2016	NA	male	1
G89100	24	control	NLD	EU	Young	EU	SchirmerM_2016	27.76	female	1
G88757	24	control	NLD	EU	Young	EU	SchirmerM_2016	22.99	female	1
G89093	30	control	NLD	EU	Young	EU	SchirmerM_2016	22.13	female	1
G88759	24	control	NLD	EU	Young	EU	SchirmerM_2016	21.47	female	1
G89101	23	control	NLD	EU	Young	EU	SchirmerM_2016	20.57	female	1
G88875	68	control	NLD	EU	Elderly	EU	SchirmerM_2016	25.62	male	1
G89135	29	control	NLD	EU	Young	EU	SchirmerM_2016	20.24	male	1
G89094	23	control	NLD	EU	Young	EU	SchirmerM_2016	22.45	male	1
G89114	58	control	NLD	EU	Middle	EU	SchirmerM_2016	31.71	female	1
G89118	21	control	NLD	EU	Young	EU	SchirmerM_2016	19.83	female	1
G89199	57	control	NLD	EU	Middle	EU	SchirmerM_2016	28.98	female	1
G89095	51	control	NLD	EU	Middle	EU	SchirmerM_2016	24.22	female	1
G89113	24	control	NLD	EU	Young	EU	SchirmerM_2016	20.44	female	1
G88825	50	control	NLD	EU	Middle	EU	SchirmerM_2016	29.68	female	1
G89121	23	control	NLD	EU	Young	EU	SchirmerM_2016	21.47	female	1
G89143	20	control	NLD	EU	Young	EU	SchirmerM_2016	22.99	male	1
G88802	49	control	NLD	EU	Middle	EU	SchirmerM_2016	22.45	female	1
G89120	22	control	NLD	EU	Young	EU	SchirmerM_2016	20.55	female	1
G89180	23	control	NLD	EU	Young	EU	SchirmerM_2016	25.48	male	1
G89179	21	control	NLD	EU	Young	EU	SchirmerM_2016	23.6	male	1
G89178	21	control	NLD	EU	Young	EU	SchirmerM_2016	22.05	female	1
G89177	22	control	NLD	EU	Young	EU	SchirmerM_2016	19.8	male	1
G89128	20	control	NLD	EU	Young	EU	SchirmerM_2016	23.62	male	1
G88761	27	control	NLD	EU	Young	EU	SchirmerM_2016	22.09	male	1
G88762	26	control	NLD	EU	Young	EU	SchirmerM_2016	21.46	male	1
G88763	24	control	NLD	EU	Young	EU	SchirmerM_2016	22.72	female	1
G88764	20	control	NLD	EU	Young	EU	SchirmerM_2016	21.72	female	1
G88769	22	control	NLD	EU	Young	EU	SchirmerM_2016	20.2	female	1
G88765	24	control	NLD	EU	Young	EU	SchirmerM_2016	20.55	female	1
G88767	23	control	NLD	EU	Young	EU	SchirmerM_2016	23.6	male	1
G88766	25	control	NLD	EU	Young	EU	SchirmerM_2016	22.84	male	1
G88774	30	control	NLD	EU	Young	EU	SchirmerM_2016	24.28	male	1
G88771	23	control	NLD	EU	Young	EU	SchirmerM_2016	25.01	female	1
G88768	22	control	NLD	EU	Young	EU	SchirmerM_2016	20.38	female	1
G88779	24	control	NLD	EU	Young	EU	SchirmerM_2016	24.84	female	1
G88772	69	control	NLD	EU	Elderly	EU	SchirmerM_2016	25.08	male	1
G88770	26	control	NLD	EU	Young	EU	SchirmerM_2016	23.2	male	1
G88776	25	control	NLD	EU	Young	EU	SchirmerM_2016	27.04	female	1
G88773	27	control	NLD	EU	Young	EU	SchirmerM_2016	21.5	female	1
G88780	32	control	NLD	EU	Young	EU	SchirmerM_2016	23.31	female	1
G88790	22	control	NLD	EU	Young	EU	SchirmerM_2016	25.8	male	1
G88781	63	control	NLD	EU	Elderly	EU	SchirmerM_2016	24.07	male	1
G88857	22	control	NLD	EU	Young	EU	SchirmerM_2016	25.71	male	1
G88755	20	control	NLD	EU	Young	EU	SchirmerM_2016	19.48	female	1
G89276	20	control	NLD	EU	Young	EU	SchirmerM_2016	27.7	male	1
G89030	24	control	NLD	EU	Young	EU	SchirmerM_2016	24.7	male	1
G89010	21	control	NLD	EU	Young	EU	SchirmerM_2016	21.26	female	1
G89000	21	control	NLD	EU	Young	EU	SchirmerM_2016	21.38	female	1
G88999	28	control	NLD	EU	Young	EU	SchirmerM_2016	24.57	female	1
G89016	38	control	NLD	EU	Young	EU	SchirmerM_2016	28.72	female	1
G89006	61	control	NLD	EU	Elderly	EU	SchirmerM_2016	21.08	female	1
G88701	25	control	NLD	EU	Young	EU	SchirmerM_2016	25.93	male	1
G89020	22	control	NLD	EU	Young	EU	SchirmerM_2016	21.28	male	1
G89017	22	control	NLD	EU	Young	EU	SchirmerM_2016	25.62	male	1
G89018	20	control	NLD	EU	Young	EU	SchirmerM_2016	25.77	male	1
G89028	24	control	NLD	EU	Young	EU	SchirmerM_2016	27.13	male	1
G89002	33	control	NLD	EU	Young	EU	SchirmerM_2016	22.99	male	1
G89011	24	control	NLD	EU	Young	EU	SchirmerM_2016	20.7	female	1
G89034	26	control	NLD	EU	Young	EU	SchirmerM_2016	28.73	male	1
G89004	48	control	NLD	EU	Middle	EU	SchirmerM_2016	24.38	female	1
G89019	25	control	NLD	EU	Young	EU	SchirmerM_2016	24.39	female	1
G89056	25	control	NLD	EU	Young	EU	SchirmerM_2016	25.76	male	1
G89039	25	control	NLD	EU	Young	EU	SchirmerM_2016	20.11	male	1
G89013	26	control	NLD	EU	Young	EU	SchirmerM_2016	21.3	female	1
G89001	20	control	NLD	EU	Young	EU	SchirmerM_2016	22.4	male	1
G89021	21	control	NLD	EU	Young	EU	SchirmerM_2016	26.26	female	1
G89037	21	control	NLD	EU	Young	EU	SchirmerM_2016	20.03	female	1
G89022	25	control	NLD	EU	Young	EU	SchirmerM_2016	21.43	male	1
G89014	27	control	NLD	EU	Young	EU	SchirmerM_2016	24.21	male	1
G88703	45	control	NLD	EU	Middle	EU	SchirmerM_2016	23.77	male	1
G89033	21	control	NLD	EU	Young	EU	SchirmerM_2016	20.52	female	1
G89031	32	control	NLD	EU	Young	EU	SchirmerM_2016	22.5	male	1
G89052	28	control	NLD	EU	Young	EU	SchirmerM_2016	28.41	male	1
G89009	23	control	NLD	EU	Young	EU	SchirmerM_2016	20.81	male	1
G89007	21	control	NLD	EU	Young	EU	SchirmerM_2016	21.97	female	1
G89008	48	control	NLD	EU	Middle	EU	SchirmerM_2016	31.31	male	1
G89057	21	control	NLD	EU	Young	EU	SchirmerM_2016	19.92	female	1
G89035	24	control	NLD	EU	Young	EU	SchirmerM_2016	23.12	male	1
G89050	24	control	NLD	EU	Young	EU	SchirmerM_2016	23.05	female	1
G89023	20	control	NLD	EU	Young	EU	SchirmerM_2016	22.84	female	1
G89051	24	control	NLD	EU	Young	EU	SchirmerM_2016	20.56	male	1
G89012	26	control	NLD	EU	Young	EU	SchirmerM_2016	23.84	male	1
G89027	26	control	NLD	EU	Young	EU	SchirmerM_2016	18.83	female	1
G89038	22	control	NLD	EU	Young	EU	SchirmerM_2016	26.87	male	1
G88920	40	control	NLD	EU	Middle	EU	SchirmerM_2016	20.72	male	1
G89040	70	control	NLD	EU	Elderly	EU	SchirmerM_2016	27.85	female	1
G89036	24	control	NLD	EU	Young	EU	SchirmerM_2016	22.22	male	1
G89029	23	control	NLD	EU	Young	EU	SchirmerM_2016	19.59	male	1
G89054	29	control	NLD	EU	Young	EU	SchirmerM_2016	18.56	female	1
G89026	27	control	NLD	EU	Young	EU	SchirmerM_2016	23.55	male	1
G89058	52	control	NLD	EU	Middle	EU	SchirmerM_2016	22.68	female	1
G89063	20	control	NLD	EU	Young	EU	SchirmerM_2016	22.92	male	1
G89064	32	control	NLD	EU	Young	EU	SchirmerM_2016	20.15	male	1
G89024	24	control	NLD	EU	Young	EU	SchirmerM_2016	22.86	female	1
G89060	21	control	NLD	EU	Young	EU	SchirmerM_2016	19.37	female	1
G89053	21	control	NLD	EU	Young	EU	SchirmerM_2016	22.79	male	1
G88704	26	control	NLD	EU	Young	EU	SchirmerM_2016	20.23	male	1
G89049	23	control	NLD	EU	Young	EU	SchirmerM_2016	24.06	female	1
G89048	39	control	NLD	EU	Young	EU	SchirmerM_2016	22.84	female	1
G88705	33	control	NLD	EU	Young	EU	SchirmerM_2016	20.76	female	1
G89061	23	control	NLD	EU	Young	EU	SchirmerM_2016	22.14	female	1
G89065	52	control	NLD	EU	Middle	EU	SchirmerM_2016	20.68	female	1
G88912	24	control	NLD	EU	Young	EU	SchirmerM_2016	19.59	male	1
G89067	33	control	NLD	EU	Young	EU	SchirmerM_2016	18.41	female	1
G89073	29	control	NLD	EU	Young	EU	SchirmerM_2016	24.31	male	1
G89068	33	control	NLD	EU	Young	EU	SchirmerM_2016	23.62	female	1
G88903	66	control	NLD	EU	Elderly	EU	SchirmerM_2016	24.69	male	1
G89074	26	control	NLD	EU	Young	EU	SchirmerM_2016	21.35	male	1
G89069	61	control	NLD	EU	Elderly	EU	SchirmerM_2016	24.46	female	1
G89059	25	control	NLD	EU	Young	EU	SchirmerM_2016	21.74	male	1
G89070	26	control	NLD	EU	Young	EU	SchirmerM_2016	21.13	male	1
G88965	22	control	NLD	EU	Young	EU	SchirmerM_2016	21.45	female	1
G89083	68	control	NLD	EU	Elderly	EU	SchirmerM_2016	21.19	female	1
G89071	23	control	NLD	EU	Young	EU	SchirmerM_2016	19.05	female	1
G88902	62	control	NLD	EU	Elderly	EU	SchirmerM_2016	25.53	female	1
G88900	58	control	NLD	EU	Middle	EU	SchirmerM_2016	21.95	female	1
G89076	28	control	NLD	EU	Young	EU	SchirmerM_2016	20.75	female	1
G88899	57	control	NLD	EU	Middle	EU	SchirmerM_2016	25.95	female	1
G89077	21	control	NLD	EU	Young	EU	SchirmerM_2016	20.11	female	1
G88904	20	control	NLD	EU	Young	EU	SchirmerM_2016	19.71	male	1
G89072	21	control	NLD	EU	Young	EU	SchirmerM_2016	22.31	female	1
G88914	20	control	NLD	EU	Young	EU	SchirmerM_2016	18.94	female	1
G88897	21	control	NLD	EU	Young	EU	SchirmerM_2016	21.05	female	1
G88918	21	control	NLD	EU	Young	EU	SchirmerM_2016	21.72	female	1
G89085	56	control	NLD	EU	Middle	EU	SchirmerM_2016	24.61	female	1
G88911	22	control	NLD	EU	Young	EU	SchirmerM_2016	24.77	female	1
G89045	26	control	NLD	EU	Young	EU	SchirmerM_2016	22.68	female	1
G88917	30	control	NLD	EU	Young	EU	SchirmerM_2016	25.01	female	1
G89079	25	control	NLD	EU	Young	EU	SchirmerM_2016	20.75	male	1
G89044	21	control	NLD	EU	Young	EU	SchirmerM_2016	22.13	female	1
G90575	22	control	NLD	EU	Young	EU	SchirmerM_2016	19.88	male	1
G88909	28	control	NLD	EU	Young	EU	SchirmerM_2016	22.78	female	1
G89080	27	control	NLD	EU	Young	EU	SchirmerM_2016	25.86	female	1
G88898	39	control	NLD	EU	Young	EU	SchirmerM_2016	25.22	female	1
G89082	25	control	NLD	EU	Young	EU	SchirmerM_2016	25.76	male	1
G88966	20	control	NLD	EU	Young	EU	SchirmerM_2016	20.48	female	1
G88905	24	control	NLD	EU	Young	EU	SchirmerM_2016	22.43	female	1
G88908	63	control	NLD	EU	Elderly	EU	SchirmerM_2016	26.17	male	1
G88906	21	control	NLD	EU	Young	EU	SchirmerM_2016	20.11	female	1
G88910	22	control	NLD	EU	Young	EU	SchirmerM_2016	24.39	female	1
G88922	26	control	NLD	EU	Young	EU	SchirmerM_2016	19.88	female	1
G88923	20	control	NLD	EU	Young	EU	SchirmerM_2016	23.53	female	1
G89055	22	control	NLD	EU	Young	EU	SchirmerM_2016	20.48	female	1
G88924	60	control	NLD	EU	Elderly	EU	SchirmerM_2016	26.7	male	1
G89042	22	control	NLD	EU	Young	EU	SchirmerM_2016	24.57	male	1
G88915	28	control	NLD	EU	Young	EU	SchirmerM_2016	19.59	female	1
G88926	23	control	NLD	EU	Young	EU	SchirmerM_2016	22.04	male	1
G88967	20	control	NLD	EU	Young	EU	SchirmerM_2016	20.72	female	1
G88913	27	control	NLD	EU	Young	EU	SchirmerM_2016	25.35	female	1
G89084	21	control	NLD	EU	Young	EU	SchirmerM_2016	32.49	female	1
G88927	20	control	NLD	EU	Young	EU	SchirmerM_2016	20.44	female	1
G88929	47	control	NLD	EU	Middle	EU	SchirmerM_2016	27.99	female	1
G88930	26	control	NLD	EU	Young	EU	SchirmerM_2016	24.24	female	1
G88931	22	control	NLD	EU	Young	EU	SchirmerM_2016	24.61	male	1
G88932	20	control	NLD	EU	Young	EU	SchirmerM_2016	20.91	male	1
G89043	25	control	NLD	EU	Young	EU	SchirmerM_2016	24.28	male	1
G88933	25	control	NLD	EU	Young	EU	SchirmerM_2016	20.45	female	1
G88934	26	control	NLD	EU	Young	EU	SchirmerM_2016	29.91	male	1
G89047	21	control	NLD	EU	Young	EU	SchirmerM_2016	21.55	female	1
G88935	23	control	NLD	EU	Young	EU	SchirmerM_2016	20.28	female	1
G88916	20	control	NLD	EU	Young	EU	SchirmerM_2016	21.05	female	1
G88937	26	control	NLD	EU	Young	EU	SchirmerM_2016	19.69	female	1
G88938	26	control	NLD	EU	Young	EU	SchirmerM_2016	22.63	female	1
G88939	20	control	NLD	EU	Young	EU	SchirmerM_2016	21.38	female	1
G88940	22	control	NLD	EU	Young	EU	SchirmerM_2016	23.37	male	1
G88941	75	control	NLD	EU	Elderly	EU	SchirmerM_2016	32.21	male	1
G88942	21	control	NLD	EU	Young	EU	SchirmerM_2016	22.59	male	1
G88943	22	control	NLD	EU	Young	EU	SchirmerM_2016	20.57	female	1
G88968	48	control	NLD	EU	Middle	EU	SchirmerM_2016	26.7	female	1
G88949	22	control	NLD	EU	Young	EU	SchirmerM_2016	27.46	male	1
G88950	20	control	NLD	EU	Young	EU	SchirmerM_2016	21.79	male	1
G88951	21	control	NLD	EU	Young	EU	SchirmerM_2016	19.49	female	1
G88952	25	control	NLD	EU	Young	EU	SchirmerM_2016	20.9	female	1
G88919	20	control	NLD	EU	Young	EU	SchirmerM_2016	17.37	female	1
G88970	40	control	NLD	EU	Middle	EU	SchirmerM_2016	24.54	male	1
G88953	43	control	NLD	EU	Middle	EU	SchirmerM_2016	27.94	female	1
G88955	27	control	NLD	EU	Young	EU	SchirmerM_2016	27.17	male	1
G88972	21	control	NLD	EU	Young	EU	SchirmerM_2016	23.84	female	1
G88973	25	control	NLD	EU	Young	EU	SchirmerM_2016	20.9	female	1
G88958	22	control	NLD	EU	Young	EU	SchirmerM_2016	25.66	female	1
G88959	26	control	NLD	EU	Young	EU	SchirmerM_2016	20.9	female	1
G88960	63	control	NLD	EU	Elderly	EU	SchirmerM_2016	19.27	male	1
G88975	22	control	NLD	EU	Young	EU	SchirmerM_2016	21.71	female	1
G88977	24	control	NLD	EU	Young	EU	SchirmerM_2016	21.71	female	1
G88978	23	control	NLD	EU	Young	EU	SchirmerM_2016	21.87	female	1
G88961	28	control	NLD	EU	Young	EU	SchirmerM_2016	20.72	female	1
G88980	24	control	NLD	EU	Young	EU	SchirmerM_2016	21.67	female	1
G88981	21	control	NLD	EU	Young	EU	SchirmerM_2016	24.45	female	1
G88983	21	control	NLD	EU	Young	EU	SchirmerM_2016	25.77	female	1
G88984	32	control	NLD	EU	Young	EU	SchirmerM_2016	24.7	male	1
G88985	23	control	NLD	EU	Young	EU	SchirmerM_2016	23.26	male	1
G88962	25	control	NLD	EU	Young	EU	SchirmerM_2016	24.38	male	1
G88986	20	control	NLD	EU	Young	EU	SchirmerM_2016	20.81	female	1
G88987	20	control	NLD	EU	Young	EU	SchirmerM_2016	21.62	male	1
G88988	22	control	NLD	EU	Young	EU	SchirmerM_2016	25.61	female	1
G88989	50	control	NLD	EU	Middle	EU	SchirmerM_2016	24.54	female	1
G88990	23	control	NLD	EU	Young	EU	SchirmerM_2016	20.81	female	1
G88690	23	control	NLD	EU	Young	EU	SchirmerM_2016	20.94	female	1
G88691	23	control	NLD	EU	Young	EU	SchirmerM_2016	23.27	male	1
G88692	24	control	NLD	EU	Young	EU	SchirmerM_2016	20.05	female	1
G88693	22	control	NLD	EU	Young	EU	SchirmerM_2016	24.44	male	1
G88713	23	control	NLD	EU	Young	EU	SchirmerM_2016	20.9	female	1
G88891	23	control	NLD	EU	Young	EU	SchirmerM_2016	20.2	female	1
G89186	47	control	NLD	EU	Middle	EU	SchirmerM_2016	27.44	male	1
G88867	20	control	NLD	EU	Young	EU	SchirmerM_2016	20.8	female	1
G88710	22	control	NLD	EU	Young	EU	SchirmerM_2016	NA	female	1
G88789	27	control	NLD	EU	Young	EU	SchirmerM_2016	21.85	male	1
G88840	21	control	NLD	EU	Young	EU	SchirmerM_2016	20.7	female	1
G88720	20	control	NLD	EU	Young	EU	SchirmerM_2016	22.6	male	1
G89125	67	control	NLD	EU	Elderly	EU	SchirmerM_2016	25.25	male	1
G89096	62	control	NLD	EU	Elderly	EU	SchirmerM_2016	20.2	male	1
G89129	28	control	NLD	EU	Young	EU	SchirmerM_2016	31.12	male	1
G88700	23	control	NLD	EU	Young	EU	SchirmerM_2016	22.79	female	1
G88876	21	control	NLD	EU	Young	EU	SchirmerM_2016	21.22	female	1
G88751	64	control	NLD	EU	Elderly	EU	SchirmerM_2016	25.71	female	1
G88871	23	control	NLD	EU	Young	EU	SchirmerM_2016	20.94	female	1
G89263	48	control	NLD	EU	Middle	EU	SchirmerM_2016	24.42	male	1
G88760	20	control	NLD	EU	Young	EU	SchirmerM_2016	23.94	male	1
MM064.1	78	control	CAN	NorthAmerica	Elderly	NorthAmerica	VincentC_2016	NA	female	2
MM064.2	78	control	CAN	NorthAmerica	Elderly	NorthAmerica	VincentC_2016	NA	female	2
MM099.1	74	CDI	CAN	NorthAmerica	Elderly	NorthAmerica	VincentC_2016	NA	male	2
MM099.2	74	CDI	CAN	NorthAmerica	Elderly	NorthAmerica	VincentC_2016	NA	male	2
MM099.3	74	CDI	CAN	NorthAmerica	Elderly	NorthAmerica	VincentC_2016	NA	male	2
MM099.4	74	CDI	CAN	NorthAmerica	Elderly	NorthAmerica	VincentC_2016	NA	male	2
MM066	68	control	CAN	NorthAmerica	Elderly	NorthAmerica	VincentC_2016	NA	female	2
MM098.1	66	CDI	CAN	NorthAmerica	Elderly	NorthAmerica	VincentC_2016	NA	male	2
MM098.10	66	CDI	CAN	NorthAmerica	Elderly	NorthAmerica	VincentC_2016	NA	male	2
MM098.11	66	CDI	CAN	NorthAmerica	Elderly	NorthAmerica	VincentC_2016	NA	male	2
MM098.12	66	CDI	CAN	NorthAmerica	Elderly	NorthAmerica	VincentC_2016	NA	male	2
MM098.13	66	CDI	CAN	NorthAmerica	Elderly	NorthAmerica	VincentC_2016	NA	male	2
MM098.14	66	CDI	CAN	NorthAmerica	Elderly	NorthAmerica	VincentC_2016	NA	male	2
MM098.15	66	CDI	CAN	NorthAmerica	Elderly	NorthAmerica	VincentC_2016	NA	male	2
MM098.2	66	CDI	CAN	NorthAmerica	Elderly	NorthAmerica	VincentC_2016	NA	male	2
MM098.3	66	CDI	CAN	NorthAmerica	Elderly	NorthAmerica	VincentC_2016	NA	male	2
MM098.4	66	CDI	CAN	NorthAmerica	Elderly	NorthAmerica	VincentC_2016	NA	male	2
MM098.5	66	CDI	CAN	NorthAmerica	Elderly	NorthAmerica	VincentC_2016	NA	male	2
MM098.6	66	CDI	CAN	NorthAmerica	Elderly	NorthAmerica	VincentC_2016	NA	male	2
MM098.7	66	CDI	CAN	NorthAmerica	Elderly	NorthAmerica	VincentC_2016	NA	male	2
MM098.8	66	CDI	CAN	NorthAmerica	Elderly	NorthAmerica	VincentC_2016	NA	male	2
MM098.9	66	CDI	CAN	NorthAmerica	Elderly	NorthAmerica	VincentC_2016	NA	male	2
MM017	75	control	CAN	NorthAmerica	Elderly	NorthAmerica	VincentC_2016	NA	female	2
MM020.1	74	control	CAN	NorthAmerica	Elderly	NorthAmerica	VincentC_2016	NA	female	2
MM020.2	74	control	CAN	NorthAmerica	Elderly	NorthAmerica	VincentC_2016	NA	female	2
MM020.3	74	control	CAN	NorthAmerica	Elderly	NorthAmerica	VincentC_2016	NA	female	2
MM072.1	73	control	CAN	NorthAmerica	Elderly	NorthAmerica	VincentC_2016	NA	female	2
MM072.2	73	control	CAN	NorthAmerica	Elderly	NorthAmerica	VincentC_2016	NA	female	2
MM070.1	68	control	CAN	NorthAmerica	Elderly	NorthAmerica	VincentC_2016	NA	male	2
MM070.2	68	control	CAN	NorthAmerica	Elderly	NorthAmerica	VincentC_2016	NA	male	2
MM070.3	68	control	CAN	NorthAmerica	Elderly	NorthAmerica	VincentC_2016	NA	male	2
MM044.1	73	control	CAN	NorthAmerica	Elderly	NorthAmerica	VincentC_2016	NA	female	2
MM044.2	73	control	CAN	NorthAmerica	Elderly	NorthAmerica	VincentC_2016	NA	female	2
MM047.1	77	control	CAN	NorthAmerica	Elderly	NorthAmerica	VincentC_2016	NA	female	2
MM047.2	77	control	CAN	NorthAmerica	Elderly	NorthAmerica	VincentC_2016	NA	female	2
MM047.3	77	control	CAN	NorthAmerica	Elderly	NorthAmerica	VincentC_2016	NA	female	2
MM052.1	73	control	CAN	NorthAmerica	Elderly	NorthAmerica	VincentC_2016	NA	male	2
MM052.2	73	control	CAN	NorthAmerica	Elderly	NorthAmerica	VincentC_2016	NA	male	2
MM091.1	71	control	CAN	NorthAmerica	Elderly	NorthAmerica	VincentC_2016	NA	male	2
MM091.2	71	control	CAN	NorthAmerica	Elderly	NorthAmerica	VincentC_2016	NA	male	2
MM091.3	71	control	CAN	NorthAmerica	Elderly	NorthAmerica	VincentC_2016	NA	male	2
MM091.4	71	control	CAN	NorthAmerica	Elderly	NorthAmerica	VincentC_2016	NA	male	2
MM032.1	78	control	CAN	NorthAmerica	Elderly	NorthAmerica	VincentC_2016	NA	female	2
MM032.2	78	control	CAN	NorthAmerica	Elderly	NorthAmerica	VincentC_2016	NA	female	2
MM032.3	78	control	CAN	NorthAmerica	Elderly	NorthAmerica	VincentC_2016	NA	female	2
MM032.4	78	control	CAN	NorthAmerica	Elderly	NorthAmerica	VincentC_2016	NA	female	2
MM013.1	76	control	CAN	NorthAmerica	Elderly	NorthAmerica	VincentC_2016	NA	male	2
MM013.2	76	control	CAN	NorthAmerica	Elderly	NorthAmerica	VincentC_2016	NA	male	2
MM013.3	76	control	CAN	NorthAmerica	Elderly	NorthAmerica	VincentC_2016	NA	male	2
MM061	68	control	CAN	NorthAmerica	Elderly	NorthAmerica	VincentC_2016	NA	male	2
MM075.1	65	control	CAN	NorthAmerica	Elderly	NorthAmerica	VincentC_2016	NA	male	2
MM075.2	65	control	CAN	NorthAmerica	Elderly	NorthAmerica	VincentC_2016	NA	male	2
MM062.1	75	control	CAN	NorthAmerica	Elderly	NorthAmerica	VincentC_2016	NA	female	2
MM062.2	75	control	CAN	NorthAmerica	Elderly	NorthAmerica	VincentC_2016	NA	female	2
MM089.1	85	control	CAN	NorthAmerica	Elderly	NorthAmerica	VincentC_2016	NA	female	2
MM089.2	85	control	CAN	NorthAmerica	Elderly	NorthAmerica	VincentC_2016	NA	female	2
MM018	65	control	CAN	NorthAmerica	Elderly	NorthAmerica	VincentC_2016	NA	male	2
MM019.1	75	control	CAN	NorthAmerica	Elderly	NorthAmerica	VincentC_2016	NA	male	2
MM019.2	75	control	CAN	NorthAmerica	Elderly	NorthAmerica	VincentC_2016	NA	male	2
MM019.3	75	control	CAN	NorthAmerica	Elderly	NorthAmerica	VincentC_2016	NA	male	2
MM027.1	65	control	CAN	NorthAmerica	Elderly	NorthAmerica	VincentC_2016	NA	female	2
MM027.2	65	control	CAN	NorthAmerica	Elderly	NorthAmerica	VincentC_2016	NA	female	2
MM027.3	65	control	CAN	NorthAmerica	Elderly	NorthAmerica	VincentC_2016	NA	female	2
MM085.1	80	control	CAN	NorthAmerica	Elderly	NorthAmerica	VincentC_2016	NA	female	2
MM085.2	80	control	CAN	NorthAmerica	Elderly	NorthAmerica	VincentC_2016	NA	female	2
MM011	85	control	CAN	NorthAmerica	Elderly	NorthAmerica	VincentC_2016	NA	female	2
MM104	81	control	CAN	NorthAmerica	Elderly	NorthAmerica	VincentC_2016	NA	male	2
MM056.1	76	control	CAN	NorthAmerica	Elderly	NorthAmerica	VincentC_2016	NA	male	2
MM056.2	76	control	CAN	NorthAmerica	Elderly	NorthAmerica	VincentC_2016	NA	male	2
MM086.2	74	control	CAN	NorthAmerica	Elderly	NorthAmerica	VincentC_2016	NA	male	2
MM086.3	74	control	CAN	NorthAmerica	Elderly	NorthAmerica	VincentC_2016	NA	male	2
MM086.5	74	control	CAN	NorthAmerica	Elderly	NorthAmerica	VincentC_2016	NA	male	2
MM086.6	74	control	CAN	NorthAmerica	Elderly	NorthAmerica	VincentC_2016	NA	male	2
MM046.1	76	control	CAN	NorthAmerica	Elderly	NorthAmerica	VincentC_2016	NA	female	2
MM046.2	76	control	CAN	NorthAmerica	Elderly	NorthAmerica	VincentC_2016	NA	female	2
MM046.3	76	control	CAN	NorthAmerica	Elderly	NorthAmerica	VincentC_2016	NA	female	2
MM037.1	78	control	CAN	NorthAmerica	Elderly	NorthAmerica	VincentC_2016	NA	female	2
MM037.2	78	control	CAN	NorthAmerica	Elderly	NorthAmerica	VincentC_2016	NA	female	2
MM101.1	80	control	CAN	NorthAmerica	Elderly	NorthAmerica	VincentC_2016	NA	male	2
MM101.2	80	control	CAN	NorthAmerica	Elderly	NorthAmerica	VincentC_2016	NA	male	2
MM055.1	72	CDI	CAN	NorthAmerica	Elderly	NorthAmerica	VincentC_2016	NA	male	2
MM055.3	72	CDI	CAN	NorthAmerica	Elderly	NorthAmerica	VincentC_2016	NA	male	2
MM055.4	72	CDI	CAN	NorthAmerica	Elderly	NorthAmerica	VincentC_2016	NA	male	2
MM055.5	72	CDI	CAN	NorthAmerica	Elderly	NorthAmerica	VincentC_2016	NA	male	2
MM055.6	72	CDI	CAN	NorthAmerica	Elderly	NorthAmerica	VincentC_2016	NA	male	2
MM055.7	72	CDI	CAN	NorthAmerica	Elderly	NorthAmerica	VincentC_2016	NA	male	2
MM069	61	control	CAN	NorthAmerica	Elderly	NorthAmerica	VincentC_2016	NA	female	2
MM087.1	78	CDI	CAN	NorthAmerica	Elderly	NorthAmerica	VincentC_2016	NA	male	2
MM087.2	78	CDI	CAN	NorthAmerica	Elderly	NorthAmerica	VincentC_2016	NA	male	2
MM103.1	85	control	CAN	NorthAmerica	Elderly	NorthAmerica	VincentC_2016	NA	male	2
MM103.2	85	control	CAN	NorthAmerica	Elderly	NorthAmerica	VincentC_2016	NA	male	2
MM103.3	85	control	CAN	NorthAmerica	Elderly	NorthAmerica	VincentC_2016	NA	male	2
MM029.1	74	control	CAN	NorthAmerica	Elderly	NorthAmerica	VincentC_2016	NA	male	2
MM029.2	74	control	CAN	NorthAmerica	Elderly	NorthAmerica	VincentC_2016	NA	male	2
MM029.3	74	control	CAN	NorthAmerica	Elderly	NorthAmerica	VincentC_2016	NA	male	2
MM035.1	80	CDI	CAN	NorthAmerica	Elderly	NorthAmerica	VincentC_2016	NA	female	2
MM035.2	80	CDI	CAN	NorthAmerica	Elderly	NorthAmerica	VincentC_2016	NA	female	2
MM022.1	78	control	CAN	NorthAmerica	Elderly	NorthAmerica	VincentC_2016	NA	female	2
MM022.2	78	control	CAN	NorthAmerica	Elderly	NorthAmerica	VincentC_2016	NA	female	2
MM022.3	78	control	CAN	NorthAmerica	Elderly	NorthAmerica	VincentC_2016	NA	female	2
MM008.1	84	control	CAN	NorthAmerica	Elderly	NorthAmerica	VincentC_2016	NA	male	2
MM008.2	84	control	CAN	NorthAmerica	Elderly	NorthAmerica	VincentC_2016	NA	male	2
MM008.3	84	control	CAN	NorthAmerica	Elderly	NorthAmerica	VincentC_2016	NA	male	2
MM014	86	control	CAN	NorthAmerica	Elderly	NorthAmerica	VincentC_2016	NA	male	2
MM033.1	79	control	CAN	NorthAmerica	Elderly	NorthAmerica	VincentC_2016	NA	female	2
MM033.2	79	control	CAN	NorthAmerica	Elderly	NorthAmerica	VincentC_2016	NA	female	2
MM033.3	79	control	CAN	NorthAmerica	Elderly	NorthAmerica	VincentC_2016	NA	female	2
MM033.4	79	control	CAN	NorthAmerica	Elderly	NorthAmerica	VincentC_2016	NA	female	2
MM025	71	control	CAN	NorthAmerica	Elderly	NorthAmerica	VincentC_2016	NA	male	2
MM015.1	81	control	CAN	NorthAmerica	Elderly	NorthAmerica	VincentC_2016	NA	female	2
[truncated: 848 more rows]

## Sheet: Thomas_Wirbel
	dataset_name	study_condition	age	country
LILT_GF06_16	ThomasAJ_Cohort1	control	77	ITA
LILT_GF12_16	ThomasAJ_Cohort1	adenoma	68	ITA
LILT_GF15_16	ThomasAJ_Cohort1	CRC	75	ITA
LILT_GF16_T017	ThomasAJ_Cohort1	adenoma	77	ITA
LILT_GF17_16	ThomasAJ_Cohort1	adenoma	62	ITA
LILT_GF18_T016	ThomasAJ_Cohort1	adenoma	55	ITA
LILT_VF00TL_16	ThomasAJ_Cohort1	control	71	ITA
LILT_VF02_T016	ThomasAJ_Cohort1	adenoma	73	ITA
LILT_VF04_16	ThomasAJ_Cohort1	adenoma	70	ITA
LILT_VF06_16	ThomasAJ_Cohort1	control	70	ITA
LILT_VF07_16	ThomasAJ_Cohort1	adenoma	64	ITA
LILT_VF100_T016	ThomasAJ_Cohort1	CRC	64	ITA
LILT_VF102_T017	ThomasAJ_Cohort1	adenoma	50	ITA
LILT_VF107_16	ThomasAJ_Cohort1	CRC	78	ITA
LILT_VF114_T017	ThomasAJ_Cohort1	CRC	77	ITA
LILT_VF120_16	ThomasAJ_Cohort1	CRC	63	ITA
LILT_VF145_T017	ThomasAJ_Cohort1	CRC	67	ITA
LILT_VF154_T017	ThomasAJ_Cohort1	CRC	77	ITA
LILT_VF166_T017	ThomasAJ_Cohort1	CRC	83	ITA
LILT_VF174_T017	ThomasAJ_Cohort1	CRC	66	ITA
LILT_VF176_T017	ThomasAJ_Cohort1	CRC	64	ITA
LILT_VF192_T017	ThomasAJ_Cohort1	CRC	78	ITA
LILT_VF197_T017	ThomasAJ_Cohort1	adenoma	77	ITA
LILT_VF29_16	ThomasAJ_Cohort1	CRC	74	ITA
LILT_VF30_16	ThomasAJ_Cohort1	adenoma	53	ITA
LILT_VF31_16	ThomasAJ_Cohort1	control	59	ITA
LILT_VF32_T016	ThomasAJ_Cohort1	adenoma	56	ITA
LILT_VF35_16	ThomasAJ_Cohort1	adenoma	59	ITA
LILT_VF37_16	ThomasAJ_Cohort1	adenoma	57	ITA
LILT_VF38_16	ThomasAJ_Cohort1	adenoma	79	ITA
LILT_VF40_16	ThomasAJ_Cohort1	control	68	ITA
LILT_VF43_16	ThomasAJ_Cohort1	control	60	ITA
LILT_VF47_16	ThomasAJ_Cohort1	adenoma	53	ITA
LILT_VF50_16	ThomasAJ_Cohort1	adenoma	58	ITA
LILT_VF55_T017	ThomasAJ_Cohort1	adenoma	77	ITA
LILT_VF56_16	ThomasAJ_Cohort1	adenoma	58	ITA
LILT_VF60_T016	ThomasAJ_Cohort1	adenoma	63	ITA
LILT_VF65_16	ThomasAJ_Cohort1	CRC	69	ITA
LILT_VF66_T017	ThomasAJ_Cohort1	adenoma	58	ITA
LILT_VF69_16	ThomasAJ_Cohort1	adenoma	49	ITA
LILT_VF70_16	ThomasAJ_Cohort1	adenoma	61	ITA
LILT_VF71_16	ThomasAJ_Cohort1	CRC	67	ITA
LILT_VF73_16	ThomasAJ_Cohort1	CRC	58	ITA
LILT_VF77_16	ThomasAJ_Cohort1	CRC	70	ITA
LILT_VF84_16	ThomasAJ_Cohort1	control	58	ITA
LILT_VF90_16	ThomasAJ_Cohort1	adenoma	57	ITA
LILT_VF95_16	ThomasAJ_Cohort1	CRC	71	ITA
LILT_VF97_16	ThomasAJ_Cohort1	adenoma	70	ITA
LILT_VF270_T017	ThomasAJ_Cohort1	CRC	60	ITA
LILT_VF207_T017	ThomasAJ_Cohort1	CRC	63	ITA
LILT_VF234_T017	ThomasAJ_Cohort1	CRC	61	ITA
LILT_VF217_T017	ThomasAJ_Cohort1	CRC	82	ITA
LILT_VF273_T017	ThomasAJ_Cohort1	CRC	83	ITA
LILT_VF208_T017	ThomasAJ_Cohort1	CRC	74	ITA
LILT_VF281_T017	ThomasAJ_Cohort1	CRC	76	ITA
LILT_VF172_T017	ThomasAJ_Cohort1	adenoma	67	ITA
LILT_VF216_T017	ThomasAJ_Cohort1	CRC	84	ITA
LILT_VF232_T017	ThomasAJ_Cohort1	CRC	69	ITA
LILT_VF264_T017	ThomasAJ_Cohort1	CRC	78	ITA
LILT_VF251_T017	ThomasAJ_Cohort1	CRC	84	ITA
LILT_VF259_T016	ThomasAJ_Cohort1	control	71	ITA
LILT_VF255_T016	ThomasAJ_Cohort1	control	69	ITA
LILT_VF170_T016	ThomasAJ_Cohort1	control	70	ITA
LILT_VF206_T016	ThomasAJ_Cohort1	control	80	ITA
LILT_VF212_T016	ThomasAJ_Cohort1	control	80	ITA
LILT_VF214_T016	ThomasAJ_Cohort1	adenoma	60	ITA
LILT_VF261_T016	ThomasAJ_Cohort1	control	69	ITA
LILT_VF262_T016	ThomasAJ_Cohort1	control	64	ITA
LILT_VF263_T016	ThomasAJ_Cohort1	control	81	ITA
LILT_VF265_T016	ThomasAJ_Cohort1	control	64	ITA
LILT_VF279_T016	ThomasAJ_Cohort1	control	61	ITA
LILT_VF300_T016	ThomasAJ_Cohort1	CRC	57	ITA
LILT_VF301_T016	ThomasAJ_Cohort1	adenoma	67	ITA
LILT_VF10_T016	ThomasAJ_Cohort1	control	60	ITA
LILT_VF140_T016	ThomasAJ_Cohort1	control	67	ITA
LILT_VF171_T016	ThomasAJ_Cohort1	control	77	ITA
LILT_VF18_T016	ThomasAJ_Cohort1	control	64	ITA
LILT_VF189_T016	ThomasAJ_Cohort1	control	66	ITA
LILT_VF28_T016	ThomasAJ_Cohort1	control	63	ITA
LILT_VF82_T016	ThomasAJ_Cohort1	control	61	ITA
CRC_MR_SBJ01C_17	ThomasAJ_Cohort2	CRC	51	ITA
CRC_MR_SBJ02C_17	ThomasAJ_Cohort2	CRC	51	ITA
CRC_MR_SBJ03H_17	ThomasAJ_Cohort2	control	52	ITA
CRC_MR_SBJ04C_17	ThomasAJ_Cohort2	CRC	69	ITA
CRC_MR_SBJ05C_17	ThomasAJ_Cohort2	CRC	46	ITA
CRC_MR_SBJ06C_17	ThomasAJ_Cohort2	CRC	57	ITA
CRC_MR_SBJ07C_17	ThomasAJ_Cohort2	CRC	38	ITA
CRC_MR_SBJ10C_17	ThomasAJ_Cohort2	CRC	68	ITA
CRC_MR_SBJ11C_17	ThomasAJ_Cohort2	CRC	68	ITA
CRC_MR_SBJ12C_17	ThomasAJ_Cohort2	CRC	65	ITA
CRC_MR_SBJ16H_17	ThomasAJ_Cohort2	control	56	ITA
CRC_MR_SBJ17H_17	ThomasAJ_Cohort2	control	50	ITA
CRC_MR_SBJ18H_17	ThomasAJ_Cohort2	control	54	ITA
CRC_MR_SBJ20C_17	ThomasAJ_Cohort2	CRC	59	ITA
CRC_MR_SBJ21H_17	ThomasAJ_Cohort2	control	67	ITA
CRC_MR_SBJ22C_17	ThomasAJ_Cohort2	CRC	62	ITA
CRC_MR_SBJ24H_17	ThomasAJ_Cohort2	control	66	ITA
CRC_MR_SBJ25C_17	ThomasAJ_Cohort2	CRC	70	ITA
CRC_MR_SBJ26C_17	ThomasAJ_Cohort2	CRC	56	ITA
CRC_MR_SBJ27C_17	ThomasAJ_Cohort2	CRC	61	ITA
CRC_MR_SBJ29C_17	ThomasAJ_Cohort2	CRC	65	ITA
CRC_MR_SBJ31C_17	ThomasAJ_Cohort2	CRC	62	ITA
CRC_MR_SBJ32C_17	ThomasAJ_Cohort2	CRC	39	ITA
CRC_MR_SBJ33C_17	ThomasAJ_Cohort2	CRC	63	ITA
CRC_MR_SBJ34H_17	ThomasAJ_Cohort2	control	58	ITA
CRC_MR_SBJ35C_17	ThomasAJ_Cohort2	CRC	59	ITA
CRC_MR_SBJ36C_17	ThomasAJ_Cohort2	CRC	51	ITA
CRC_MR_SBJ37H_17	ThomasAJ_Cohort2	control	58	ITA
CRC_MR_SBJ39C_17	ThomasAJ_Cohort2	CRC	58	ITA
CRC_MR_SBJ40C_17	ThomasAJ_Cohort2	CRC	59	ITA
CRC_MR_SBJ42C_17	ThomasAJ_Cohort2	CRC	64	ITA
CRC_MR_SBJ45H_17	ThomasAJ_Cohort2	control	54	ITA
CRC_MR_SBJ46H_17	ThomasAJ_Cohort2	control	66	ITA
CRC_MR_SBJ47C_17	ThomasAJ_Cohort2	CRC	50	ITA
CRC_MR_SBJ49C_17	ThomasAJ_Cohort2	CRC	69	ITA
CRC_MR_SBJ50C_17	ThomasAJ_Cohort2	CRC	56	ITA
CRC_MR_SBJ51C_17	ThomasAJ_Cohort2	CRC	62	ITA
CRC_MR_SBJ52C_17	ThomasAJ_Cohort2	CRC	66	ITA
CRC_MR_SBJ53C_17	ThomasAJ_Cohort2	CRC	55	ITA
CRC_MR_SBJ55C_17	ThomasAJ_Cohort2	CRC	67	ITA
CRC_MR_SBJ57H_17	ThomasAJ_Cohort2	control	66	ITA
CRC_MR_SBJ60H_17	ThomasAJ_Cohort2	control	56	ITA
CRC_MR_SBJ61C_17	ThomasAJ_Cohort2	CRC	56	ITA
CRC_MR_SBJ64C_17	ThomasAJ_Cohort2	CRC	48	ITA
CRC_MR_SBJ65H_17	ThomasAJ_Cohort2	control	53	ITA
CRC_MR_SBJ67H_17	ThomasAJ_Cohort2	control	46	ITA
CRC_MR_SBJ68H_17	ThomasAJ_Cohort2	control	60	ITA
CRC_MR_SBJ69H_17	ThomasAJ_Cohort2	control	62	ITA
CRC_MR_SBJ73H_17	ThomasAJ_Cohort2	control	61	ITA
CRC_MR_SBJ74H_17	ThomasAJ_Cohort2	control	69	ITA
CRC_MR_SBJ75H_17	ThomasAJ_Cohort2	control	65	ITA
CRC_MR_SBJ77H_17	ThomasAJ_Cohort2	control	64	ITA
CRC_MR_SBJ78H_17	ThomasAJ_Cohort2	control	54	ITA
CRC_MR_SBJ79H_17	ThomasAJ_Cohort2	control	67	ITA
CRC_MR_SBJ80H_17	ThomasAJ_Cohort2	control	40	ITA
CRC_MR_SBJ81H_17	ThomasAJ_Cohort2	control	60	ITA
CRC_MR_SBJ82H_17	ThomasAJ_Cohort2	control	69	ITA
CRC_MR_SBJ83H_17	ThomasAJ_Cohort2	control	47	ITA
CRC_MR_SBJ84H_17	ThomasAJ_Cohort2	control	41	ITA
CCMD11006829ST-21-0	WirbelJ_2019	CRC	42	DEU
CCMD12232071ST-21-0	WirbelJ_2019	CRC	75	DEU
CCMD13071240ST-21-0	WirbelJ_2019	CRC	66	DEU
CCMD13934959ST-21-0	WirbelJ_2019	CRC	56	DEU
CCMD14479708ST-21-0	WirbelJ_2019	CRC	74	DEU
CCMD18872694ST-21-0	WirbelJ_2019	CRC	63	DEU
CCMD19497912ST-21-0	WirbelJ_2019	CRC	53	DEU
CCMD23101338ST-21-0	WirbelJ_2019	CRC	69	DEU
CCMD25511638ST-21-0	WirbelJ_2019	CRC	72	DEU
CCMD25963797ST-21-0	WirbelJ_2019	CRC	62	DEU
CCMD26709089ST-21-0	WirbelJ_2019	CRC	66	DEU
CCMD26925580ST-21-0	WirbelJ_2019	CRC	42	DEU
CCMD34381688ST-21-0	WirbelJ_2019	CRC	41	DEU
CCMD35802077ST-21-0	WirbelJ_2019	CRC	71	DEU
CCMD40701343ST-21-0	WirbelJ_2019	CRC	65	DEU
CCMD42428553ST-21-0	WirbelJ_2019	CRC	87	DEU
CCMD45988061ST-21-0	WirbelJ_2019	CRC	62	DEU
CCMD46222674ST-21-0	WirbelJ_2019	CRC	59	DEU
CCMD46947453ST-21-0	WirbelJ_2019	CRC	69	DEU
CCMD48236717ST-21-0	WirbelJ_2019	CRC	58	DEU
CCMD50071957ST-21-0	WirbelJ_2019	CRC	35	DEU
CCMD51864103ST-21-0	WirbelJ_2019	CRC	58	DEU
CCMD60079086ST-21-0	WirbelJ_2019	CRC	73	DEU
CCMD63399960ST-21-0	WirbelJ_2019	CRC	51	DEU
CCMD64503764ST-21-0	WirbelJ_2019	CRC	66	DEU
CCMD64776337ST-21-0	WirbelJ_2019	CRC	79	DEU
CCMD72895164ST-21-0	WirbelJ_2019	CRC	34	DEU
CCMD74930188ST-21-0	WirbelJ_2019	CRC	67	DEU
CCMD79987997ST-21-0	WirbelJ_2019	CRC	70	DEU
CCMD82866709ST-21-0	WirbelJ_2019	CRC	77	DEU
CCMD86114146ST-21-0	WirbelJ_2019	CRC	68	DEU
CCMD86707194ST-21-0	WirbelJ_2019	CRC	53	DEU
CCMD87156761ST-21-0	WirbelJ_2019	CRC	55	DEU
CCMD88272491ST-21-0	WirbelJ_2019	CRC	72	DEU
CCMD90311071ST-21-0	WirbelJ_2019	CRC	43	DEU
CCMD93344354ST-21-0	WirbelJ_2019	CRC	51	DEU
CCMD95433940ST-21-0	WirbelJ_2019	CRC	49	DEU
CCMD96553385ST-21-0	WirbelJ_2019	CRC	90	DEU
MMPU29365221ST	WirbelJ_2019	control	34	DEU
MMPU68403337ST	WirbelJ_2019	control	30	DEU
MMPU72854103ST	WirbelJ_2019	control	34	DEU
MMPU84450604ST	WirbelJ_2019	control	37	DEU
MMPU99077057ST	WirbelJ_2019	control	49	DEU
CCMD10032470ST-11-0	WirbelJ_2019	control	45	DEU
CCMD10191450ST-11-0	WirbelJ_2019	control	62	DEU
CCMD15562448ST-11-0	WirbelJ_2019	control	74	DEU
CCMD17410933ST-11-0	WirbelJ_2019	control	59	DEU
CCMD18579000ST-11-0	WirbelJ_2019	control	59	DEU
CCMD18829815ST-11-0	WirbelJ_2019	control	62	DEU
CCMD19168690ST-11-0	WirbelJ_2019	CRC	63	DEU
CCMD21593359ST-11-0	WirbelJ_2019	CRC	85	DEU
CCMD21703880ST-11-0	WirbelJ_2019	CRC	80	DEU
CCMD22852639ST-11-0	WirbelJ_2019	control	50	DEU
CCMD23541216ST-11-0	WirbelJ_2019	control	61	DEU
CCMD25475945ST-11-0	WirbelJ_2019	control	59	DEU
CCMD26625622ST-11-0	WirbelJ_2019	control	50	DEU
CCMD27463710ST-11-0	WirbelJ_2019	CRC	81	DEU
CCMD27867141ST-11-0	WirbelJ_2019	control	55	DEU
CCMD28738636ST-11-0	WirbelJ_2019	control	73	DEU
CCMD29706695ST-11-0	WirbelJ_2019	control	45	DEU
CCMD30626189ST-11-0	WirbelJ_2019	control	51	DEU
CCMD30627121ST-11-0	WirbelJ_2019	control	48	DEU
CCMD31009081ST-11-0	WirbelJ_2019	control	64	DEU
CCMD31134579ST-11-0	WirbelJ_2019	control	75	DEU
CCMD32288175ST-11-0	WirbelJ_2019	control	57	DEU
CCMD32965613ST-11-0	WirbelJ_2019	control	64	DEU
CCMD35081859ST-11-0	WirbelJ_2019	control	60	DEU
CCMD35633353ST-11-0	WirbelJ_2019	CRC	61	DEU
CCMD35801800ST-11-0	WirbelJ_2019	control	29	DEU
CCMD37575804ST-11-0	WirbelJ_2019	control	44	DEU
CCMD38158721ST-11-0	WirbelJ_2019	control	76	DEU
CCMD39157124ST-11-0	WirbelJ_2019	control	56	DEU
CCMD39882286ST-11-0	WirbelJ_2019	control	53	DEU
CCMD41202658ST-11-0	WirbelJ_2019	control	61	DEU
CCMD41521570ST-11-0	WirbelJ_2019	control	67	DEU
CCMD42956136ST-11-0	WirbelJ_2019	CRC	67	DEU
CCMD45004878ST-11-0	WirbelJ_2019	control	53	DEU
CCMD45812507ST-11-0	WirbelJ_2019	control	75	DEU
CCMD46727384ST-11-0	WirbelJ_2019	control	53	DEU
CCMD49025643ST-11-0	WirbelJ_2019	control	41	DEU
CCMD49461418ST-11-0	WirbelJ_2019	CRC	61	DEU
CCMD49942357ST-11-0	WirbelJ_2019	control	46	DEU
CCMD50300306ST-11-0	WirbelJ_2019	control	64	DEU
CCMD50529145ST-11-0	WirbelJ_2019	control	63	DEU
CCMD50538120ST-11-0	WirbelJ_2019	control	75	DEU
CCMD51154251ST-11-0	WirbelJ_2019	control	50	DEU
CCMD51228890ST-11-0	WirbelJ_2019	control	65	DEU
CCMD52117727ST-11-0	WirbelJ_2019	CRC	79	DEU
CCMD52145360ST-11-0	WirbelJ_2019	CRC	81	DEU
CCMD53508245ST-11-0	WirbelJ_2019	control	61	DEU
CCMD53522274ST-11-0	WirbelJ_2019	control	75	DEU
CCMD54057834ST-11-0	WirbelJ_2019	control	57	DEU
CCMD56948710ST-11-0	WirbelJ_2019	control	66	DEU
CCMD59540613ST-11-0	WirbelJ_2019	control	64	DEU
CCMD59583015ST-11-0	WirbelJ_2019	CRC	61	DEU
CCMD65222621ST-11-0	WirbelJ_2019	CRC	63	DEU
CCMD65406197ST-11-0	WirbelJ_2019	CRC	50	DEU
CCMD66848156ST-11-0	WirbelJ_2019	control	64	DEU
CCMD67373733ST-11-0	WirbelJ_2019	control	73	DEU
CCMD68973846ST-11-0	WirbelJ_2019	control	64	DEU
CCMD71242853ST-11-0	WirbelJ_2019	CRC	56	DEU
CCMD71915439ST-11-0	WirbelJ_2019	CRC	60	DEU
CCMD72666896ST-11-0	WirbelJ_2019	control	58	DEU
CCMD72690923ST-11-0	WirbelJ_2019	CRC	60	DEU
CCMD73128545ST-11-0	WirbelJ_2019	control	57	DEU
CCMD74592084ST-11-0	WirbelJ_2019	control	48	DEU
CCMD75147712ST-11-0	WirbelJ_2019	control	53	DEU
CCMD76222476ST-11-0	WirbelJ_2019	CRC	62	DEU
CCMD76409700ST-11-0	WirbelJ_2019	control	60	DEU
CCMD79349503ST-11-0	WirbelJ_2019	CRC	60	DEU
CCMD85481373ST-11-0	WirbelJ_2019	control	69	DEU
CCMD85661207ST-11-0	WirbelJ_2019	control	28	DEU
CCMD89107682ST-11-0	WirbelJ_2019	control	54	DEU
CCMD89306485ST-11-0	WirbelJ_2019	CRC	52	DEU
CCMD89643949ST-11-0	WirbelJ_2019	control	51	DEU
CCMD89967135ST-11-0	WirbelJ_2019	control	58	DEU
CCMD92404903ST-11-0	WirbelJ_2019	CRC	66	DEU
CCMD93755960ST-11-0	WirbelJ_2019	control	45	DEU
CCMD95431029ST-11-0	WirbelJ_2019	CRC	84	DEU
CCMD95676152ST-11-0	WirbelJ_2019	CRC	73	DEU
CCMD98198513ST-11-0	WirbelJ_2019	control	59	DEU
CCMD98531134ST-11-0	WirbelJ_2019	CRC	59	DEU
CCMD98702133ST-11-0	WirbelJ_2019	control	37	DEU
CCMD99440714ST-11-0	WirbelJ_2019	control	39	DEU
CCMD99929634ST-11-0	WirbelJ_2019	control	70	DEU
