# Supplementary material for: Adjusting for age improves identification of gut microbiome alterations in multiple diseases
Source: eLife. 2020 Mar 11;9:e50240. doi: 10.7554/eLife.50240 (PMC7065848; doi:10.7554/eLife.50240)
Supplement: Supplementary file 2. [file elife-50240-supp2.xlsx]

## Sheet: Legend
Supplementary File 2: (A) Clinical Metadata of the ELDERMET Subjects. (Code for Stratification: 1=Community; 2=DayHospital; 3=Rehab; 4=Longstay) (B)

## Sheet: A
SampleID	Age	Barthel_Score	FIM	MMSE	MNA	BMI	CC	Diastolic	Height	MAC	Pulse	Sex	Stratification	Systolic	Temperature	Weight	Stratification2 (Community-dwelling v/s Residential Care)
EM013_T0	71	20	121	26	27	31.4	35	76	181	30.5	82	2	2	123	NA	103	1
EM018_T0	79	20	125	24	23.5	32	40	88	160	30	NA	2	2	168	36.6	84	1
EM020_T0	72	17	115	25	23.5	31	38	70	165	29	NA	2	2	126	35.8	88.6	1
EM021_T0	78	20	126	30	17	17	22	67	180	28	NA	1	2	115	36.8	43.9	1
EM022_T0	74	20	126	30	25	24	31	69	180	27	NA	2	1	121	36	77	1
EM024_T0	87	14	102	26	12.5	18	28	72	170	22	NA	1	2	128	36.1	51	1
EM025_T0	68	20	126	30	26.5	25.3	36	96	170	31	61	2	1	180	35.4	73	1
EM027_T0	85	18	122	30	23	21	33	75	180	26.5	72	2	2	140	36.1	69.2	1
EM029_T0	80	20	124	30	25	27	32	64	163	26	NA	2	2	167	36.3	71	1
EM030_T0	78	20	126	30	26	21	28	68	171	27	NA	1	2	139	36.1	62	1
EM033_T0	94	17	121	25	24.5	25	32	NA	173	26	NA	2	2	NA	NA	75	1
EM040_T0	72	20	126	30	26	42.5	43	71	151	39	72	1	1	149	36.3	97	1
EM040_T6	73	20	126	28	26	42.5	46	79	151	40	64	1	1	165	36.5	97	1
EM042_T0	84	20	124	28	20.5	21	34	54	176	26	68	1	2	91	36	65.9	1
EM044_T6	74	20	126	30	29	24	34	72	163	28	70	1	1	145	35.7	64	1
EM045_T6	67	16	102	29	23.5	34	37	79	170	31	76	2	2	132	36.1	98.6	1
EM047_T6	67	20	126	30	28.5	36	45	90	1.69	36.5	62	2	1	159	36.5	103	1
EM049_T6	66	20	126	30	26	27.8	39	63	182	29	57	2	1	125	36.2	92	1
EM051_T6	70	20	126	27	27	27.4	39	78	188	29	64	2	1	166	35.7	97	1
EM053_T6	67	20	125	30	25	21.5	31	79	175	22	52	2	1	141	35.9	65	1
EM054_T0	85	20	125	29	24	23.2	31	90	175	26	72	2	1	165	36	71	1
EM055_T0	85	20	125	30	29	32.1	34	97	154	32	70	1	1	167	36.4	75	1
EM057_T6	73	19	119	30	25	28.7	39	77	167	32	69	1	2	136	35.7	80	1
EM058_T0	65	20	125	26	29	25	37	79	160	28.5	76	1	1	139	37	63	1
EM059_T6	76	20	125	30	25.5	29.9	47	78	183	29	59	2	2	143	36	100	1
EM060_T0	72	20	125	30	28.5	25.2	37	78	163	28	78	1	1	127	36.6	67	1
EM060_T6	73	20	125	30	28	25.6	35	90	163	27	72	1	1	155	36	68	1
EM061_T0	78	20	125	29	27	32.8	38	84	166	33	62	2	1	168	36.7	90.5	1
EM062_T0	73	20	126	27	27	27	35	67	162	28	70	1	1	155	36	70	1
EM064_T6	72	20	126	30	26	25	31.5	77	153	25	62	1	1	150	35.9	58	1
EM065_T6	67	20	126	30	27	28.7	39	84	165	31	74	2	1	153	35.6	78	1
EM066_T6	66	20	126	30	26.5	30	37	80	157	33	83	1	1	112	36.2	74	1
EM070_T0	66	20	126	29	26.5	24.6	37	82	170	25	86	2	1	151	36.3	71	1
EM073_T6	72	20	125	30	28.5	25.2	39	81	170	29	78	2	1	131	35.8	72.7	1
EM075_T6	66	20	126	30	28	25	36	92	170	26	72	2	1	176	35.5	72	1
EM081_T3	75	20	126	30	26	31.6	36	72	160	33	78	1	1	135	35.6	84	1
EM082_T6	72	20	126	28	25	30.31	40	91	178	31	78	2	1	148	36.4	96	1
EM083_T3	65	20	125	29	25	33.3	38	92	151	32	53	1	1	170	35.6	76	1
EM085_T6	72	20	126	30	29	29	37	90	173	30	70	2	1	155	35.9	87	1
EM086_T6	66	20	126	29	27.5	27.5	36	67	177	28	68	2	1	120	35.7	86	1
EM088_T3	88	20	124	30	26	21.7	32	74	165	25	75	1	2	144	36.4	59	1
EM089_T0	68	20	126	29	27.5	24.2	35.5	82	156	26	68	1	1	140	36.1	59	1
EM093_T3	77	18	107	28	27	32.5	39	95	171	32	71	2	2	162	35.2	95	1
EM096_T3	73	20	126	30	28	27	35	67	168	29	63	2	1	126	35	76.1	1
EM100_T6	70	20	126	30	28.5	22.9	36	72	166	27	64	1	1	124	36	63	1
EM102_T6	68	20	126	30	28	28.7	36	75	168	29	76	2	1	134	36.4	81	1
EM104_T3	77	20	125	30	27.5	24.6	33	68	173	28	63	2	1	141	36.6	73.5	1
EM106_T6	83	20	126	28	25.5	30.5	40	70	169	28	88	2	1	146	36.2	86.6	1
EM107_T3	77	20	126	29	27	31.2	36	73	164	31	78	1	1	148	36.7	84	1
EM109_T6	70	20	126	28	27.5	32.5	44	70	179	32	53	2	1	128	35.8	104.2	1
EM110_T3	71	19	124	30	24.5	25.4	32	64	155	28	85	1	1	107	36.1	61	1
EM119_T6	66	20	125	26	27.5	34.3	46	94	175	30	65	2	1	170	36	105	1
EM120_T3	79	20	125	30	27	27.5	36	77	165	30	80	2	1	135	36	75	1
EM121_T0	70	20	126	27	28	28.2	36	87	153	31	77	1	1	153	36.6	66	1
EM125_T3	87	12	86	14	23	27.2	38	63	166	23	94	2	4	97	36.1	75	2
EM126_T3	76	9	71	17	26	23.6	29	48	183	26	72	2	3	91	36.4	79	2
EM133_T3	84	13	103	21	22	32	33	59	161	36	46	1	3	131	36.4	83	2
EM134_T6	79	20	125	30	28	28	40	62	172	28	64	2	1	147	36.2	83.2	1
EM136_T0	73	3	62	20	22	27.3	30	75	159	30	63	2	4	115	36.8	69	2
EM137_T6	85	9	73	27	14	16.7	30	80	168	18	63	2	4	140	36	47	2
EM138_T0	78	12	84	27	20	29.4	31	62	168	27	78	2	4	134	36	83	2
EM142_T3	81	11	82	15	21.5	31.6	37	60	165	28	53	2	3	106	36	86	2
EM143_T0	85	20	126	29	27.5	28	37	72	164	25	62	2	1	144	35.7	75	1
EM144_T3	67	10	83	26	22.5	28.7	35	66	168	27	54	2	4	141	36.1	81	2
EM145_T6	78	2	49	23	22	26.4	33	69	152	29	87	1	4	103	36.2	61	2
EM146_T3	88	1	36	17	15.5	22.1	26	64	152	25	61	1	4	145	36.6	51	2
EM148_T0	71	15	102	23	24	35.8	37	77	168	34	60	2	4	114	36.5	101	2
EM152_T0	87	10	84	22	23.5	22.2	32	58	150	24	73	1	3	107	36	50	2
EM156_T3	74	7	55	15	22	23.3	29	59	171	27	60	2	4	109	36.7	68	2
EM157_T3	74	20	126	26	28.5	30	38	86	155	28	73	2	1	145	36.1	72	1
EM160_T3	76	20	125	29	25	26	34	77	152	26	73	1	1	134	35.6	60	1
EM163_T0	87	0	0	NA	4	15	24	68	168	19	NA	1	4	100	37.3	40.8	2
EM166_T0	76	1	35	7	16	23.9	29	78	171	25	68	2	4	130	36.4	70	2
EM166_T3	77	0	32	7	12	21.2	30	60	171	26	55	2	4	NA	36	62	2
EM170_T0	88	7	78	NA	NA	20.8	NA	90	164	NA	101	1	4	125	36	56	2
EM171_T3	72	18	122	30	25	29.8	37	74	170	30	68	2	1	125	36.3	86	1
EM172_T0	65	20	126	30	26.5	30	42	90	180	31	74	2	1	145	36.1	105	1
EM175_T0	93	17	115	25	26.5	24	33	61	173	26	74	2	1	159	36.2	72	1
EM176_T0	68	19	125	29	29	26.9	35.5	74	164	29	66	1	1	124	36.6	72.4	1
EM177_T0	83	16	109	27	26.5	28.7	38	60	175	28	89	2	1	106	36.1	88	1
EM179_T0	70	1	37	NA	21	26.3	29	86	171	32	78	1	4	152	36	77	2
EM183_T6	93	7	59	15	19.5	25.8	36	60	152	30	72	1	4	103	36	59.7	2
EM184_T3	72	0	17	NA	12.5	19.7	25	72	153	24	68	1	4	147	36.4	46	2
EM185_T3	78	20	125	25	27.5	31.2	37	89	157	28	94	1	1	142	36.5	77	1
EM187_T0	84	8	65	28	23	25.1	36	65	152	31	62	1	4	123	36.5	58	2
EM188_T6	97	2	46	23	19	19.5	25	103	165	26	81	1	4	163	36.4	53	2
EM189_T3	83	7	86	21	22.5	36.2	38	66	162	35	66	2	4	109	35.3	95	2
EM190_T0	77	1	20	NA	13	21.6	28	81	168	26	82	2	4	114	35.5	61	2
EM191_T0	90	0	17	NA	10	12.1	23	80	152	18	88	1	4	136	36.5	28	2
EM193_T6	68	20	126	30	27.5	23.6	34	85	177	28	68	2	1	133	36.1	74	1
EM196_T6	84	0	17	0	5.5	14.7	22	57	155	20	96	1	4	114	37.1	35.3	2
EM203_T0	66	20	126	29	28	21.6	35	74	161	28	66	1	1	132	37	55.8	1
EM205_T0	69	20	126	30	26.5	27.5	36	73	160	30	60	1	1	132	36.5	73	1
EM206_T6	72	20	126	27	26.5	31	39	98	170	29	63	2	1	169	35.6	90	1
EM207_T3	64	20	125	29	25	44.5	44	77	155	35	67	1	1	147	35.6	107	1
EM208_T0	82	1	28	6	12	18.7	27	72	160	25	70	1	4	136	36.8	48	2
EM209_T0	77	8	75	29	26	23.6	33	94	150	25	92	1	3	144	36.9	53	2
EM211_T6	86	0	36	12	16	28.8	30	63	155	29	94	1	4	135	36.3	69.3	2
EM214_T0	74	20	126	29	23.5	21	30	64	165	24	68	1	1	110	36.3	58.2	1
EM217_T6	86	0	15	NA	15	25.6	33	67	165	30	71	1	4	118	35.6	69.6	2
EM219_T0	77	3	17	NA	13.5	26.5	28	64	148	27	100	1	3	145	36.6	58	2
EM220_T6	84	1	17	NA	13	23.7	27	69	155	28	83	1	4	144	37	57	2
EM221_T0	85	11	95	17	20	20.3	34	86	169	28	69	1	4	139	36	58	2
EM222_T6	71	20	125	30	26	26	39	78	180	27	74	2	1	128	36.1	84	1
EM223_T0	68	20	125	25	26.5	30	40	77	160	32	78	1	1	129	36.3	77	1
EM224_T3	73	20	126	29	25.5	26	35	73	172	28	72	2	1	134	35.8	77	1
EM227_T0	92	0	20	0	12	17.9	24	60	155	23	84	1	4	126	36.5	43	2
EM228_T6	71	20	126	29	26.5	35.3	47	76	186	36	76	2	1	134	36.2	122	1
EM229_T0	75	20	126	28	27	28.3	34	102	150	28	72	1	1	164	37	68	1
EM230_T0	81	20	125	22	27	24.2	34	68	164	24	62	2	1	160	36.4	65	1
EM232_T0	69	17	115	25	25	26.8	23	50	157	25	60	1	3	122	36.8	66	2
EM233_T6	76	3	65	29	24	25.3	32	82	148	26	80	1	4	140	36.3	55.5	2
EM235_T6	81	20	126	28	26.5	22	34	81	164	26	68	1	1	174	36.3	59	1
EM236_T0	95	9	46	NA	13.5	22.2	29	48	144	23	99	1	4	85	36	46	2
EM238_T0	87	0	30	NA	15	22.6	29	65	156	26	70	1	4	122	36.1	55	2
EM239_T3	80	19	126	26	23	33	38	82	178	30	78	2	1	167	36.1	105	1
EM242_T0	81	14	65	20	23	26.2	31	58	155	28	79	1	4	95	36.2	63	2
EM249_T0	92	1	18	NA	13	21.6	27	71	155	26	68	1	4	145	36.3	52	2
EM251_T0	88	20	125	29	24	19.4	30	62	161	23	72	1	1	138	36.4	50.2	1
EM251_T6	89	20	125	28	25	19.3	32	64	161	23	68	1	1	134	36	50	1
EM252_T3	80	20	125	24	25	28	35	81	163	28	77	1	1	146	35.9	74	1
EM253_T0	81	20	124	27	27	27.8	33	72	157	31	72	1	1	176	35.5	68.5	1
EM259_T0	67	20	126	28	26.5	22.3	25	63	164	23	71	1	1	123	36	60	1
EM260_T0	76	20	126	29	25	27.2	37	90	185	29	71	2	1	162	35.9	93	1
EM261_T3	68	20	126	30	26.5	32.4	42	95	173	31	83	2	1	160	35.6	97	1
EM262_T3	65	20	126	29	27.5	28	35	76	167	27	69	1	1	151	35.9	66	1
EM263_T3	69	20	126	28	27	31.3	39	67	175	30	63	2	1	169	36.1	96	1
EM264_T0	86	20	126	27	26	24	34	80	154	25	79	1	1	125	36.1	57	1
EM264_T3	86	20	126	29	26	24.5	35	68	154	25	82	1	1	112	35.5	58	1
EM268_T0	79	20	126	30	27.5	23	32	82	157	24	72	1	1	126	36	57	1
EM269_T0	67	20	126	26	24.5	41	50	89	165	39	85	1	1	153	36.6	111	1
EM271_T0	73	20	125	30	26.5	25.3	35	79	155	25	59	1	1	130	36.6	60.7	1
EM272_T0	92	20	126	28	27	23	32	59	171	23	68	2	2	119	36.6	66.4	1
EM273_T0	78	20	126	28	28	47.7	45	78	158	31	60	1	1	125	36	119	1
EM274_T0	84	5	56	15	20.5	27.6	38	79	158	29	86	1	4	119	36	69	2
EM275_T0	102	12	97	19	27	24.8	33	60	152	25	76	1	4	130	36.4	57.2	2
EM276_T0	71	20	124	28	27.5	27	34	77	156	28	88	1	1	127	35.9	65	1
EM277_T0	70	20	124	26	26	32	36	87	153	29	75	1	1	165	36.2	75	1
EM278_T0	64	20	126	30	26.5	24	36	67	160	26	72	1	1	125	35.9	61	1
EM279_T3	86	20	125	29	23.5	22	33	62	150	22	76	1	1	110	36.3	49	1
EM282_T0	70	20	125	27	22.5	30.5	35	68	181	29	68	2	1	149	36.5	100	1
EM283_T0	81	20	126	28	25.5	29.9	37	80	158	30	62	1	1	132	35.8	74.6	1
EM284_T0	85	12	94	21	24.5	27.9	37	79	171	27	89	2	3	134	35.8	81.6	2
EM291_T0	86	2	26	2	19	27.9	30	46	155	29	98	1	4	109	36.1	67	2
EM293_T0	75	7	80	25	21	21	30	47	161	24	75	1	4	98	36.5	53.7	2
EM298_T0	72	6	51	11	22	24.5	31	73	155	27	86	1	4	112	36.5	58.85	2
EM301_T3	91	4	38	14	13.5	19	21	79	148	22	96	1	4	139	35.5	41.6	2
EM305_T0	79	17	113	25	24.5	28.8	38	80	161	33	63	1	3	144	36.8	74.6	2
EM307_T3	68	20	126	29	27.5	30.5	32	81	146	32	73	1	1	132	35.6	65	1
EM308_T0	82	3	19	0	13	21.6	30	56	162	27	76	2	4	144	36.9	56.8	2
EM316_T3	74	7	69	15	20.5	26.8	36	65	168	29	62	2	3	143	36.2	75.65	2
EM326_T0	66	10	83	28	26	38.3	37	66	175	36	67	2	3	120	36.4	118.3	2
EM334_T0	83	20	124	27	22	29.6	39	68	158	28	68	2	2	126	36	74	1
EM336_T3	69	20	126	30	28	NA	36	79	165	28	66	1	1	129	NA	NA	1
EM337_T0	76	15	117	25	25	33.2	42	59	158	34	71	1	3	108	36.3	83	2
EM338_T0	75	10	62	14	23.5	29.2	38	66	158	33	64	1	3	104	36.5	73	2
EM342_T6	75	20	126	30	25.5	33.2	37	99	171	32	78	2	1	150	36.8	97	1
EM345_T6	83	20	126	30	26.5	35.1	38	71	168	39	77	1	1	125	36.8	99	1
EM348_T6	74	20	126	27	28	32	37	84	151	31	65	1	1	168	36.5	73	1
EM350_T0	81	20	125	23	27	28.1	37	61	175	34	50	2	2	137	36.4	86	1
EM354_T0	70	20	126	25	26	46.3	52	69	161	39	63	1	2	108	NA	120	1
EM355_T3	88	17	114	26	25.5	29.7	37	76	156	31	87	1	2	131	35	72.3	1
EM356_T3	71	20	126	28	26	28.5	38	79	167	30	69	2	2	131	35	79.6	1
EM357_T0	88	18	124	26	21.5	24.4	35	53	162	27	42	2	2	157	36.2	64	1
EM361_T6	86	20	124	28	29	25.6	38	105	171	26	100	2	2	155	36.8	75	1
EM362_T3	81	15	100	24	25	25.7	33.5	85	161	32.5	66	1	1	171	36.6	66.5	1
EM364_T0	73	20	126	29	26.5	34.1	38	96	178	31	83	2	2	151	36.5	108	1
EM367_T0	80	20	125	27	25	31.3	40	79	173	30	74	2	2	133	35.6	93.6	1
EM369_T3	79	20	123	22	26.5	21.2	31	74	165	23	70	1	1	143	36.8	51	1
EM370_T0	83	15	101	29	22	35.5	42.5	76	158	38	74	1	2	143	35	88.6	1
EM371_T3	82	19	121	29	24.5	25.6	36	68	158	26.5	81	1	2	108	35.5	64	1
EM372_T3	76	20	126	29	28	32.7	39	69	165	31	60	2	1	152	35	89	1
EM374_T3	82	17	103	15	20	21.2	28	81	155	23	86	1	1	114	36.8	51.5	1
EM376_T3	78	20	125	26	26.5	28.7	36.5	77	155	32	65	1	1	149	35	69	1
EM381_T6	70	20	126	30	27	29	41	71	165	34	78	2	1	150	36.5	79	1
EM384_T3	65	20	126	29	25.5	29	33	72	153	29	50	1	1	137	36.9	68	1
EM388_T3	88	19	119	28	25.5	23.9	36	69	165	26	65	2	1	138	36	65	1
EM389_T6	67	20	126	30	26	34.7	43	NA	168	41	68	1	1	NA	36.8	98	1
EM394_T3	84	19	116	26	23.5	28.7	36	73	155	28	50	1	1	183	35.2	69	1
EM399_T0	78	20	126	28	28	30.4	42.5	82	156	30	67	1	2	167	36.2	74.1	1
EM409_T0	69	18	117	26	26	27	36	73	171	31	65	2	2	129	35.4	79	1
EM410_T0	80	20	116	27	25.5	26.5	38	58	168	30	83	2	2	106	35.1	74.9	1
EM413_T3	68	20	126	30	26.5	32.8	39.5	88	171	34.5	64	2	1	175	36.8	96	1
EM416_T0	82	18	116	19	23.5	21.6	31	70	158	24	98	1	2	121	35.9	54	1
EM422_T3	72	20	126	27	25.5	27.3	40.5	84	168	31	71	2	1	156	35.5	77	1
EM433_T0	74	20	126	29	27.5	25.7	37	90	165	32	64	1	1	144	36	70	1
EM438_T3	69	20	126	NA	NA	27.1	NA	66	175	NA	61	2	1	132	37	NA	1
EM442_T3	82	20	126	30	27.5	25.2	34.5	73	163	29	71	2	1	135	36.3	67	1
EM448_T0	75	20	126	28	23	26.7	34.5	64	1.71	27	54	2	1	136	36.2	78	1

## Sheet: B
	Abiotrophia_defectiva	Acidaminococcus_fermentans	Acidaminococcus_intestini	Acinetobacter_baumannii	Acinetobacter_haemolyticus	Acinetobacter_johnsonii	Acinetobacter_junii	Acinetobacter_lwoffii	Acinetobacter_radioresistens	Actinomyces_cardiffensis	Actinomyces_georgiae	Actinomyces_graevenitzii	Actinomyces_naeslundii	Actinomyces_odontolyticus	Actinomyces_oris	Actinomyces_turicensis	Actinomyces_urogenitalis	Actinomyces_viscosus	Aerococcus_viridans	Aeromonas_caviae	Aeromonas_hydrophila	Aeromonas_media	Aeromonas_veronii	Agrobacterium_tumefaciens	Akkermansia_muciniphila	Alcaligenes_faecalis	Alistipes_finegoldii	Alistipes_indistinctus	Alistipes_onderdonkii	Alistipes_putredinis	Alistipes_shahii	Alloprevotella_tannerae	Anaerobaculum_hydrogeniformans	Anaerococcus_hydrogenalis	Anaerococcus_prevotii	Anaerococcus_vaginalis	Anaerofustis_stercorihominis	Anaerostipes_caccae	Anaerostipes_hadrus	Anaerotruncus_colihominis	Aneurinibacillus_aneurinilyticus	Arcanobacterium_haemolyticum	Atopobium_minutum	Atopobium_parvulum	Atopobium_rimae	Bacillus_amyloliquefaciens	Bacillus_atrophaeus	Bacillus_fordii	Bacillus_licheniformis
EM013_T0	0	0	0	0	0	0	0	0	0	0	0	0	0	0	0	0	0	0	0	0	0	0	0	0	1.03995	0	1.03167	0.19164	0.00839	11.5945	7.68477	0	0	0	0	0	0	0	0	0	0	0	0	0	0	0	0	0	0
EM018_T0	0	0	0	0	0	0	0	0	0	0	0	0	0	0	0	0	0	0	0	0	0	0	0	0	0.081	0	0.05044	0.47305	1.81121	11.517	8.57465	0	0	0	0	0	0	0	0.00607	0	0	0	0	0	0	0	0	0	0
EM020_T0	0	0	0	0	0	0	0	0	0	0	0	0	0	0	0	0	0	0	0	0	0	0	0	0	0	0	0.42952	0.01437	1.85442	8.6121	4.30559	0	0	0	0	0	0	0	0	0.00673	0	0	0	0	0	0	0	0	0
EM021_T0	0	0	0	0	0	0	0	0	0	0	0	0	0	0	0	0	0	0	0	0	0	0	0	0	0.003	0	0.01268	0.09075	0	0.0563	0.21914	0	0	0	0	0	0	0	0	0	0	0	0	0	0	0	0	0	0
EM022_T0	0	0	0	0	0	0	0	0	0	0	0	0	0	0	0	0	0	0	0	0	0	0	0	0	6.36797	0	0.07335	0	0	0	0.03706	0	0	0	0	0	0	0	0.00471	0	0	0	0	0	0	0	0	0	0
EM024_T0	0	0	0	0	0	0	0	0	0	0	0	0	0	0	0	0	0	0	0	0	0	0	0	0	0.04084	0	0.00108	0.67891	0.05807	9.50871	2.67719	0	0	0	0	0	0	0	0.03883	0	0	0	0	0	0	0	0	0	0
EM025_T0	0	0	0	0	0	0	0	0	0	0	0	0	0	0	0	0	0	0	0	0	0	0	0	0	0.00129	0	0	0.06395	0.01727	19.4366	7.48912	0	0	0	0	0	0	0	0.11358	0.00409	0	0	0	0	0	0	0	0	0
EM027_T0	0	0	0	0	0	0	0	0	0	0	0	0	0	0	0	0	0	0	0	0	0	0	0	0	0	0	0.45973	0	10.4452	0	0	0	0	0	0	0	0	0	0.00045	0.01093	0	0	0	0	0	0	0	0	0
EM029_T0	0	0	0	0	0	0	0	0	0	0	0	0	0	0	0	0	0	0	0	0	0	0	0	0	0.01863	0	2.88863	0.15805	0.98788	6.29329	4.32718	0	0	0	0	0	0	0	0.01362	0.01026	0	0	0	0	0	0	0	0	0
EM030_T0	0	0	0	0	0	0	0	0	0	0	0	0	0	0	0	0	0	0	0	0	0	0	0	0	0.21731	0	0.00298	0.00046	0.4004	4.89195	4.11129	0	0	0	0	0	0	0	0.12404	0	0	0	0	0	0	0	0	0	0
EM033_T0	0	0	0	0	0	0	0	0	0	0	0	0	0	0	0	0	0	0	0	0	0	0	0	0	0.06641	0	0.20205	0.45922	2.05546	7.03007	2.88916	0	0	0	0	0	0	0	0.00188	0.00051	0	0	0	0	0	0	0	0	0
EM040_T0	0	0	0	0	0	0	0	0	0	0	0	0	0	0	0	0	0	0	0	0	0	0	0	0	0.02243	0	0.06967	0.10268	0.61686	3.19696	0.00118	0	0	0	0	0	0	0	0.01071	0	0	0	0	0	0	0	0	0	0
EM040_T6	0	0	0	0	0	0	0	0	0	0	0	0	0	0	0	0	0	0	0	0	0	0	0	0	0.24215	0	0.08676	0.04085	0.80213	2.96016	0.00124	0	0	0	0	0	0	0	0.26988	0	0	0	0	0	0	0	0	0	0
EM042_T0	0	0	0	0	0	0	0	0	0	0	0	0	0	0	0	0	0	0	0	0	0	0	0	0	4.24879	0	0.06218	0.38548	0.96597	0.07306	1.0757	0	0	0	0	0	0	0	0.00156	0	0	0	0	0	0	0	0	0	0
EM044_T6	0	0	0	0	0	0	0	0	0	0	0	0	0	0	0	0	0	0	0	0	0	0	0	0	0.08128	0	0.37158	0	0.04233	8.22744	1.50649	0	0	0	0	0	0	0	0.05472	0	0	0	0	0	0	0	0	0	0
EM045_T6	0	0	0	0	0	0	0	0	0	0	0	0	0	0	0	0	0	0	0	0	0	0	0	0	0.00115	0	0	0	2.61362	0	0	0	0	0	0	0	0	0	0.02004	0.01737	0	0	0	0	0	0	0	0	0
EM047_T6	0	0	0	0	0	0	0	0	0	0	0	0	0	0	0	0	0	0	0	0	0	0	0	0	0	0	0	0	0	34.5103	0	0	0	0	0	0	0	0	0.0054	0.00223	0	0	0	0	0	0	0	0	0
EM049_T6	0	0	0	0	0	0	0	0	0	0	0	0	0	0	0	0	0	0	0	0	0	0	0	0	0	0	0.01994	0.00933	0.14676	10.2696	1.60811	0	0	0	0	0	0	0	0.05554	0	0	0	0	0	0	0	0	0	0
EM051_T6	0	0	0	0	0	0	0	0	0	0	0	0	0	0	0	0	0	0	0	0	0	0	0	0	0	0	0.09058	0.2958	0.5982	1.24788	0.54497	0	0	0	0	0	0	0	0.00157	0	0	0	0	0	0	0	0	0	0
EM053_T6	0	0	0	0	0	0	0	0	0	0	0	0	0	0	0	0	0	0	0	0	0	0	0	0	0	0	0.04903	0	2.32089	13.1879	0	0	0	0	0	0	0	0	0.25306	0	0	0	0	0	0	0	0	0	0
EM054_T0	0	0	0	0	0	0	0	0	0	0	0	0	0	0	0	0	0	0	0	0	0	0	0	0	0.1257	0	1.1282	0.02732	2.57837	6.14413	0.89718	0	0	0	0	0	0	0	0	0	0	0	0	0	0	0	0	0	0
EM055_T0	0	0	0	0	0	0	0	0	0	0	0	0	0	0	0	0	0	0	0	0	0	0	0	0	1.14597	0	0.82855	0	0.51816	3.36015	0.38174	0	0	0	0	0	0	0	0.01747	0	0	0	0	0	0	0	0	0	0
EM057_T6	0	0	0	0	0	0	0	0	0	0	0	0	0	0	0	0	0	0	0	0	0	0	0	0	0.00282	0	0.00696	0.38421	0.14671	13.2477	1.606	0	0	0	0	0	0	0	0.00668	0	0	0	0	0	0	0	0	0	0
EM058_T0	0	0	0	0	0	0	0	0	0	0	0	0	0	0	0	0	0	0	0	0	0	0	0	0	0.03873	0	0.1696	0.02381	5.12885	0.02175	7.6494	0	0	0	0	0	0	0	0.01545	0	0	0	0	0	0	0	0	0	0
EM059_T6	0	0	0	0	0	0	0	0	0	0	0	0	0	0	0	0	0	0	0	0	0	0	0	0	1.15995	0	0.0086	0	0.1491	6.52687	0.27545	0	0	0	0	0	0	0	0	0	0	0	0	0	0	0	0	0	0
EM060_T0	0	0	0	0	0	0	0	0	0	0	0	0	0	0	0	0	0	0	0	0	0	0	0	0	0.06683	0	0.02505	0.19556	0.0013	8.335	2.47187	0	0	0	0	0	0	0	0.03531	0	0	0	0	0	0	0	0	0	0
EM060_T6	0	0	0	0	0	0	0	0	0	0	0	0	0	0	0	0	0	0	0	0	0	0	0	0	0.1469	0	0.00372	0.06754	0.00035	7.41788	1.91502	0	0	0	0	0	0	0	0.05561	0	0	0	0	0	0	0	0	0	0
EM061_T0	0	0	0	0	0	0	0	0	0	0	0	0	0	0	0	0	0	0	0	0	0	0	0	0	2.52843	0	0.83721	0	2.33083	3.21849	0	0	0	0	0	0	0	0	0.067	0.00346	0	0	0	0	0	0	0	0	0
EM062_T0	0	0	0	0	0	0	0	0	0	0	0	0	0	0	0	0	0	0	0	0	0	0	0	0	0.77641	0	0.27538	0	0.3018	4.71657	0.44731	0	0	0	0	0	0	0	0.04685	0	0	0	0	0	0	0	0	0	0
EM064_T6	0	0	0	0	0	0	0	0	0	0	0	0	0	0	0	0	0	0	0	0	0	0	0	0	8.72963	0	0.20458	0.16159	10.4333	10.3183	0.50838	0	0	0	0	0	0	0	0.17581	0	0	0	0	0	0	0	0	0	0
EM065_T6	0	0	0	0	0	0	0	0	0	0	0	0	0	0	0	0	0	0	0	0	0	0	0	0	0.38575	0	0.00164	0	17.3556	0.03075	0	0	0	0	0	0	0	0	0.02181	0	0	0	0	0	0	0	0	0	0
EM066_T6	0	0	0	0	0	0	0	0	0	0	0	0	0	0	0	0	0	0	0	0	0	0	0	0	0.12854	0	0.01372	0	0.00733	3.24149	0.06497	0	0	0	0	0	0	0	0.22051	0	0	0	0	0	0	0	0	0	0
EM070_T0	0	0	0	0	0	0	0	0	0	0	0	0	0	0	0	0	0	0	0	0	0	0	0	0	0.11707	0	0.45654	0.0891	0.97873	12.0662	4.22762	0	0	0	0	0	0	0	0.02593	0	0	0	0	0	0	0	0	0	0
EM073_T6	0	0	0	0	0	0	0	0	0	0	0	0	0	0	0	0	0	0	0	0	0	0	0	0	0	0	0	0	3.00709	0.0231	0	0	0	0	0	0	0	0	0.01564	0.00049	0	0	0	0	0	0	0	0	0
EM075_T6	0	0	0	0	0	0	0	0	0	0	0	0	0	0	0	0	0	0	0	0	0	0	0	0	0	0	0	0	0	0	0	0	0	0	0	0	0	0	0.02213	0	0	0	0	0	0	0	0	0	0
EM081_T3	0	0	0	0	0	0	0	0	0	0	0	0	0	0	0	0	0	0	0	0	0	0	0	0	0.68953	0	6.42271	0.00285	10.8219	11.1669	0	0	0	0	0	0	0	0	0.02342	0	0	0	0	0	0	0	0	0	0
EM082_T6	0	0	0	0	0	0	0	0	0	0	0	0	0	0	0	0	0	0	0	0	0	0	0	0	0	0	0.27157	0	9.79108	0.01041	0	0	0	0	0	0	0	0	0.03615	0	0	0	0	0	0	0	0	0	0
EM083_T3	0	0	0	0	0	0	0	0	0	0	0	0	0	0	0	0	0	0	0	0	0	0	0	0	1.69507	0	0	0.28566	0	0.00281	0	0	0	0	0	0	0	0	0.02149	0.00387	0	0	0	0	0	0	0	0	0
EM085_T6	0	0	0	0	0	0	0	0	0	0	0	0	0	0	0	0	0	0	0	0	0	0	0	0	5.36669	0	0	0	2.15921	0	3.65561	0	0	0	0	0	0	0	0.01457	0	0	0	0	0	0	0	0	0	0
EM086_T6	0	0	0	0	0	0	0	0	0	0	0	0	0	0	0	0	0	0	0	0	0	0	0	0	0.55629	0	0.13672	0.16794	3.0856	3.50946	0.73256	0	0	0	0	0	0	0	0.01138	0	0	0	0	0	0	0	0	0	0
EM088_T3	0	0	0	0	0	0	0	0	0	0	0	0	0	0	0	0	0	0	0	0	0	0	0	0	0	0	0.08526	0.08554	0.58783	4.67807	0.00053	0	0	0	0	0	0	0	0.08641	0	0	0	0	0	0	0	0	0	0
EM089_T0	0	0	0	0	0	0	0	0	0	0	0	0	0	0	0	0	0	0	0	0	0	0	0	0	2.79876	0	0.01726	0.12957	0.55964	0	0	0	0	0	0	0	0	0	1.43711	0.00178	0	0	0	0	0	0	0	0	0
EM093_T3	0	0	0	0	0	0	0	0	0	0	0	0	0	0	0	0	0	0	0	0	0	0	0	0	0.05953	0	0.27586	0.0483	2.77657	2.69355	0.51475	0	0	0	0	0	0	0	0.09504	0	0	0	0	0	0	0	0	0	0
EM096_T3	0	0	0	0	0	0	0	0	0	0	0	0	0	0	0	0	0	0	0	0	0	0	0	0	0	0	0	0.95815	0.00249	0	0	0	0	0	0	0	0	0	0	0.0425	0	0	0	0	0	0	0	0	0
EM100_T6	0	0	0	0	0	0	0	0	0	0	0	0	0	0	0	0	0	0	0	0	0	0	0	0	0.1513	0	0.06601	0.61132	0.30561	6.64224	2.1479	0	0	0	0	0	0	0	0.20639	0	0	0	0	0	0	0	0	0	0
EM102_T6	0	0	0	0	0	0	0	0	0	0	0	0	0	0	0	0	0	0	0	0	0	0	0	0	0	0	0.35752	0.32313	2.11848	9.8768	0.32173	0	0	0	0	0	0	0	0.06311	0.01734	0	0	0	0	0	0	0	0	0
EM104_T3	0	0	0	0	0	0	0	0	0	0	0	0	0	0	0	0	0	0	0	0	0	0	0	0	5.04534	0	0.02296	0	0	0.31169	0.31661	0	0	0	0	0	0	0	0.00872	0	0	0	0	0	0	0	0	0	0
EM106_T6	0	0	0	0	0	0	0	0	0	0	0	0	0	0	0	0	0	0	0	0	0	0	0	0	0.09605	0	0.06416	0.07122	0.9307	5.17351	0.79526	0	0	0	0	0	0	0	0.00281	0	0	0	0	0	0	0	0	0	0
EM107_T3	0	0	0	0	0	0	0	0	0	0	0	0	0	0	0	0	0	0	0	0	0	0	0	0	1.55744	0	0.00139	0.0563	0.30305	0.37008	1.02321	0	0	0	0	0	0	0	0.00819	0	0	0	0	0	0	0	0	0	0
EM109_T6	0	0	0	0	0	0	0	0	0	0	0	0	0	0	0	0	0	0	0	0	0	0	0	0	0.45568	0	0.00557	0.01292	4.31167	13.9439	3.94617	0	0	0	0	0	0	0	0.21926	0	0	0	0	0	0	0	0	0	0
EM110_T3	0	0	0	0	0	0	0	0	0	0	0	0	0	0	0	0	0	0	0	0	0	0	0	0	0	0	0.87252	0.18775	0.39663	7.93223	0.34419	0	0	0	0	0	0	0	0.29183	0	0	0	0	0	0	0	0	0	0
EM119_T6	0	0	0	0	0	0	0	0	0	0	0	0	0	0	0	0	0	0	0	0	0	0	0	0	3.94463	0	0.15988	0.54457	1.06272	16.5247	1.54549	0	0	0	0	0	0	0	0.03551	0	0	0	0	0	0	0	0	0	0
EM120_T3	0	0	0	0	0	0	0	0	0	0	0	0	0	0	0	0	0	0	0	0	0	0	0	0	0.30534	0	0.01691	0.11547	0.00469	3.23312	2.27064	0	0	0	0	0	0	0	0.01728	0	0	0	0	0	0	0	0	0	0
EM121_T0	0	0	0	0	0	0	0	0	0	0	0	0	0	0	0	0	0	0	0	0	0	0	0	0	2.96067	0	0.13567	0.23858	11.6422	7.75467	0.29021	0	0	0	0	0	0	0	0.00629	0	0	0	0	0	0	0	0	0	0
EM134_T6	0	0	0	0	0	0	0	0	0	0	0	0	0	0	0	0	0	0	0	0	0	0	0	0	0	0	0.09756	0.00757	0.0016	2.87903	0.20109	0	0	0	0	0	0	0	0.1867	0	0	0	0	0	0	0	0	0	0
EM143_T0	0	0	0	0	0	0	0	0	0	0	0	0	0	0	0	0	0	0	0	0	0	0	0	0	1.33515	0	0.26838	0.51147	0.93148	5.58259	0.91223	0	0	0	0	0	0	0	0.0934	0	0	0	0	0	0	0	0	0	0
EM157_T3	0	0	0	0	0	0	0	0	0	0	0	0	0	0	0	0	0	0	0	0	0	0	0	0	0.00687	0	0.03156	0.42573	1.16601	12.7879	0.75025	0	0	0	0	0	0	0	0.0011	0	0	0	0	0	0	0	0	0	0
EM160_T3	0	0	0	0	0	0	0	0	0	0	0	0	0	0	0	0	0	0	0	0	0	0	0	0	0.3255	0	0.24601	0.20668	0.54349	0	0.40896	0	0	0	0	0	0	0	0.07473	0	0	0	0	0	0	0	0	0	0
EM171_T3	0	0	0	0	0	0	0	0	0	0	0	0	0	0	0	0	0	0	0	0	0	0	0	0	0.8382	0	0.06695	0	0.0986	4.26773	0.19832	0	0	0	0	0	0	0	0.00187	0	0	0	0	0	0	0	0	0	0
EM172_T0	0	0	0	0	0	0	0	0	0	0	0	0	0	0	0	0	0	0	0	0	0	0	0	0	1.56963	0	0.05882	0.01078	0.40438	2.74532	1.14036	0	0	0	0	0	0	0	0.00404	0	0	0	0	0	0	0	0	0	0
EM175_T0	0	0	0	0	0	0	0	0	0	0	0	0	0	0	0	0	0	0	0	0	0	0	0	0	0.11137	0	0.01001	0.01354	0.04198	0.00987	0.00354	0	0	0	0	0	0	0	0.00614	0	0	0	0	0	0	0	0	0	0
EM176_T0	0	0	0	0	0	0	0	0	0	0	0	0	0	0	0	0	0	0	0	0	0	0	0	0	0.0672	0	2.00886	0	8.88889	4.0596	1.50525	0	0	0	0	0	0	0	0.0547	0	0	0	0	0	0	0	0	0	0
EM177_T0	0	0	0	0	0	0	0	0	0	0	0	0	0	0	0	0	0	0	0	0	0	0	0	0	0.10884	0	3.54916	0	0.57466	5.68684	2.39762	0	0	0	0	0	0	0	0	0	0	0	0	0	0	0	0	0	0
EM185_T3	0	0	0	0	0	0	0	0	0	0	0	0	0	0	0	0	0	0	0	0	0	0	0	0	0.00439	0	0.12888	0.02252	1.04317	10.7435	0	0	0	0	0	0	0	0	0.0674	0	0	0	0	0	0	0	0	0	0
EM193_T6	0	0	0	0	0	0	0	0	0	0	0	0	0	0	0	0	0	0	0	0	0	0	0	0	0	0	0.99844	0.0283	0.81094	0.10989	5.04275	0	0	0	0	0	0	0	0.03895	0	0	0	0	0	0	0	0	0	0
EM203_T0	0	0	0	0	0	0	0	0	0	0	0	0	0	0	0	0	0	0	0	0	0	0	0	0	0.7797	0	0.05404	0.03744	0.29544	8.18121	3.22586	0	0	0	0	0	0	0	0.02489	0	0	0	0	0	0	0	0	0	0
EM205_T0	0	0	0	0	0	0	0	0	0	0	0	0	0	0	0	0	0	0	0	0	0	0	0	0	0.00321	0	0.04595	0.07686	0.64162	7.17196	2.14697	0	0	0	0	0	0	0	0.06853	0	0	0	0	0	0	0	0	0	0
EM206_T6	0	0	0	0	0	0	0	0	0	0	0	0	0	0	0	0	0	0	0	0	0	0	0	0	0	0	0.28962	0.02021	1.23122	6.41269	0.03664	0	0	0	0	0	0	0	0.03794	0	0	0	0	0	0	0	0	0	0
EM207_T3	0	0	0	0	0	0	0	0	0	0	0	0	0	0	0	0	0	0	0	0	0	0	0	0	0.43072	0	0	0	0.04082	1.83594	0.5385	0	0	0	0	0	0	0	0.00236	0.00172	0	0	0	0	0	0	0	0	0
EM214_T0	0	0	0	0	0	0	0	0	0	0	0	0	0	0	0	0	0	0	0	0	0	0	0	0	0	0	0	0	0	1.7064	0.11039	0	0	0	0	0	0	0	0.23223	0	0	0	0	0	0	0	0	0	0
EM222_T6	0	0	0	0	0	0	0	0	0	0	0	0	0	0	0	0	0	0	0	0	0	0	0	0	2.50708	0	0.04006	0.14833	2.50337	2.0356	0.51017	0	0	0	0	0	0	0	0.04248	0	0	0	0	0	0	0	0	0	0
EM223_T0	0	0	0	0	0	0	0	0	0	0	0	0	0	0	0	0	0	0	0	0	0	0	0	0	0	0	0.069	0	0.0348	0	0.52999	0	0	0	0	0	0	0	0.02541	0	0	0	0	0	0	0	0	0	0
EM224_T3	0	0	0	0	0	0	0	0	0	0	0	0	0	0	0	0	0	0	0	0	0	0	0	0	0.043	0	1.24931	0.02787	2.18399	9.18955	0.70291	0	0	0	0	0	0	0	0.00246	0	0	0	0	0	0	0	0	0	0
EM228_T6	0	0	0	0	0	0	0	0	0	0	0	0	0	0	0	0	0	0	0	0	0	0	0	0	0.96443	0	0.02303	0.03425	3.28203	1.86895	1.61442	0	0	0	0	0	0	0	0.00522	0	0	0	0	0	0	0	0	0	0
EM229_T0	0	0	0	0	0	0	0	0	0	0	0	0	0	0	0	0	0	0	0	0	0	0	0	0	1.69971	0	3.27511	0	2.28364	0	0	0	0	0	0	0	0	0	0.01054	0	0	0	0	0	0	0	0	0	0
EM230_T0	0	0	0	0	0	0	0	0	0	0	0	0	0	0	0	0	0	0	0	0	0	0	0	0	0.46389	0	3.34566	0	5.59519	0	0	0	0	0	0	0	0	0	0.05209	0	0	0	0	0	0	0	0	0	0
EM235_T6	0	0	0	0	0	0	0	0	0	0	0	0	0	0	0	0	0	0	0	0	0	0	0	0	1.14244	0	0.33897	0.09796	0.83257	6.6874	1.47785	0	0	0	0	0	0	0	0.01915	0	0	0	0	0	0	0	0	0	0
EM239_T3	0	0	0	0	0	0	0	0	0	0	0	0	0	0	0	0	0	0	0	0	0	0	0	0	0.34199	0	0.02576	0.00199	0.24061	2.33452	1.06427	0	0	0	0	0	0	0	0.00718	0	0	0	0	0	0	0	0	0	0
EM251_T0	0	0	0	0	0	0	0	0	0	0	0	0	0	0	0	0	0	0	0	0	0	0	0	0	0.0017	0	0.17471	0	0.31656	8.25736	0.43758	0	0	0	0	0	0	0	0.16879	0	0	0	0	0	0	0	0	0	0
EM251_T6	0	0	0	0	0	0	0	0	0	0	0	0	0	0	0	0	0	0	0	0	0	0	0	0	0	0	0.31822	0	0.74082	14.9796	3.40759	0	0	0	0	0	0	0	0.30718	0	0	0	0	0	0	0	0	0	0
EM252_T3	0	0	0	0	0	0	0	0	0	0	0	0	0	0	0	0	0	0	0	0	0	0	0	0	2.73022	0	0	0	0	8.40674	3.66135	0	0	0	0	0	0	0	0.11366	0.0066	0	0	0	0	0	0	0	0	0
EM253_T0	0	0	0	0	0	0	0	0	0	0	0	0	0	0	0	0	0	0	0	0	0	0	0	0	0	0	0.3371	0.8574	0.46166	7.86914	0.4885	0	0	0	0	0	0	0	0.01524	0	0	0	0	0	0	0	0	0	0
EM259_T0	0	0	0	0	0	0	0	0	0	0	0	0	0	0	0	0	0	0	0	0	0	0	0	0	0	0	0.01414	2.92341	1.72156	11.8336	2.70373	0	0	0	0	0	0	0	0.00505	0	0	0	0	0	0	0	0	0	0
EM260_T0	0	0	0	0	0	0	0	0	0	0	0	0	0	0	0	0	0	0	0	0	0	0	0	0	1.98304	0	0.01072	0	0	0	0	0	0	0	0	0	0	0	0.10623	0.00091	0	0	0	0	0	0	0	0	0
EM261_T3	0	0	0	0	0	0	0	0	0	0	0	0	0	0	0	0	0	0	0	0	0	0	0	0	0	0	0	0	0.05492	0.26574	0	0	0	0	0	0	0	0	0.05798	0	0	0	0	0	0	0	0	0	0
EM262_T3	0	0	0	0	0	0	0	0	0	0	0	0	0	0	0	0	0	0	0	0	0	0	0	0	0.13574	0	0.0943	0.02583	0.34317	0	0	0	0	0	0	0	0	0	0.00778	0	0	0	0	0	0	0	0	0	0
EM263_T3	0	0	0	0	0	0	0	0	0	0	0	0	0	0	0	0	0	0	0	0	0	0	0	0	3.17072	0	0.08264	0.08856	0.13514	6.3355	0.31682	0	0	0	0	0	0	0	0.03742	0	0	0	0	0	0	0	0	0	0
EM264_T0	0	0	0	0	0	0	0	0	0	0	0	0	0	0	0	0	0	0	0	0	0	0	0	0	0.25797	0	0.08506	0	1.79585	11.8138	0	0	0	0	0	0	0	0	0.00467	0	0	0	0	0	0	0	0	0	0
EM264_T3	0	0	0	0	0	0	0	0	0	0	0	0	0	0	0	0	0	0	0	0	0	0	0	0	1.48248	0	0.16978	0	3.96598	7.90629	0	0	0	0	0	0	0	0	0.00243	0	0	0	0	0	0	0	0	0	0
EM268_T0	0	0	0	0	0	0	0	0	0	0	0	0	0	0	0	0	0	0	0	0	0	0	0	0	1.22847	0	0.6779	0	29.0046	6.26905	4.27379	0	0	0	0	0	0	0	0.03869	0	0	0	0	0	0	0	0	0	0
EM269_T0	0	0	0	0	0	0	0	0	0	0	0	0	0	0	0	0	0	0	0	0	0	0	0	0	2.11091	0	0.21533	0.18396	1.65056	1.84672	0.28644	0	0	0	0	0	0	0	0.00281	0	0	0	0	0	0	0	0	0	0
EM271_T0	0	0	0	0	0	0	0	0	0	0	0	0	0	0	0	0	0	0	0	0	0	0	0	0	0.33239	0	0.06673	0.03908	0.08276	3.13362	2.45515	0	0	0	0	0	0	0	0.01349	0	0	0	0	0	0	0	0	0	0
EM272_T0	0	0	0	0	0	0	0	0	0	0	0	0	0	0	0	0	0	0	0	0	0	0	0	0	1.27786	0	0.82007	0.11722	20.3628	2.90036	4.03442	0	0	0	0	0	0	0	0	0.00873	0	0	0	0	0	0	0	0	0
EM273_T0	0	0	0	0	0	0	0	0	0	0	0	0	0	0	0	0	0	0	0	0	0	0	0	0	1.17759	0	4.3077	0.05207	1.46022	7.17278	3.65339	0	0	0	0	0	0	0	0	0	0	0	0	0	0	0	0	0	0
EM276_T0	0	0	0	0	0	0	0	0	0	0	0	0	0	0	0	0	0	0	0	0	0	0	0	0	0.01512	0	1.90804	0.00937	2.79859	14.529	3.68329	0	0	0	0	0	0	0	0.01495	0	0	0	0	0	0	0	0	0	0
EM277_T0	0	0	0	0	0	0	0	0	0	0	0	0	0	0	0	0	0	0	0	0	0	0	0	0	0.00264	0	1.79605	0.04049	0.0964	7.55938	0.78281	0	0	0	0	0	0	0	0.02471	0	0	0	0	0	0	0	0	0	0
EM278_T0	0	0	0	0	0	0	0	0	0	0	0	0	0	0	0	0	0	0	0	0	0	0	0	0	0.04034	0	0.26974	0.43399	0.10879	4.23017	1.58877	0	0	0	0	0	0	0	0.07332	0	0	0	0	0	0	0	0	0	0
EM279_T3	0	0	0	0	0	0	0	0	0	0	0	0	0	0	0	0	0	0	0	0	0	0	0	0	0.01123	0	0	0.01822	0.45372	19.2074	2.66603	0	0	0	0	0	0	0	0.02724	0	0	0	0	0	0	0	0	0	0
EM282_T0	0	0	0	0	0	0	0	0	0	0	0	0	0	0	0	0	0	0	0	0	0	0	0	0	1.0071	0	0.01933	0.07879	0.18537	10.7306	5.29249	0	0	0	0	0	0	0	0.12085	0	0	0	0	0	0	0	0	0	0
EM283_T0	0	0	0	0	0	0	0	0	0	0	0	0	0	0	0	0	0	0	0	0	0	0	0	0	6.74224	0	1.95871	0	3.71879	11.0109	0.00546	0	0	0	0	0	0	0	0.01547	0	0	0	0	0	0	0	0	0	0
EM307_T3	0	0	0	0	0	0	0	0	0	0	0	0	0	0	0	0	0	0	0	0	0	0	0	0	0	0	0.36544	0	0	0	0	0	0	0	0	0	0	0	0.03144	0.00247	0	0	0	0	0	0	0	0	0
EM334_T0	0	0	0	0	0	0	0	0	0	0	0	0	0	0	0	0	0	0	0	0	0	0	0	0	0	0	0.01085	0	0.07794	0	0.03977	0	0	0	0	0	0	0	0.00369	0	0	0	0	0	0	0	0	0	0
EM336_T3	0	0	0	0	0	0	0	0	0	0	0	0	0	0	0	0	0	0	0	0	0	0	0	0	0.04814	0	0.4053	0.00826	0.86526	4.37811	0.78141	0	0	0	0	0	0	0	0.0105	0	0	0	0	0	0	0	0	0	0
EM342_T6	0	0	0	0	0	0	0	0	0	0	0	0	0	0	0	0	0	0	0	0	0	0	0	0	0	0	0.00333	0.00552	0.12648	3.6861	0.70186	0	0	0	0	0	0	0	0	0	0	0	0	0	0	0	0	0	0
EM345_T6	0	0	0	0	0	0	0	0	0	0	0	0	0	0	0	0	0	0	0	0	0	0	0	0	0.62345	0	0.76649	0	0	0	1.96852	0	0	0	0	0	0	0	0	0.0019	0	0	0	0	0	0	0	0	0
EM348_T6	0	0	0	0	0	0	0	0	0	0	0	0	0	0	0	0	0	0	0	0	0	0	0	0	0	0	0	0	0	6.28264	0.08795	0	0	0	0	0	0	0	0.00233	0	0	0	0	0	0	0	0	0	0
EM350_T0	0	0	0	0	0	0	0	0	0	0	0	0	0	0	0	0	0	0	0	0	0	0	0	0	0	0	1.07568	0.04642	11.2688	8.58811	6.40065	0	0	0	0	0	0	0	0.02491	0.00667	0	0	0	0	0	0	0	0	0
EM354_T0	0	0	0	0	0	0	0	0	0	0	0	0	0	0	0	0	0	0	0	0	0	0	0	0	0.00931	0	0.02681	0.16935	0.62293	6.72109	3.14739	0	0	0	0	0	0	0	0.02636	0.02048	0	0	0	0	0	0	0	0	0
EM355_T3	0	0	0	0	0	0	0	0	0	0	0	0	0	0	0	0	0	0	0	0	0	0	0	0	1.8089	0	0.1663	0	8.30084	0	0	0	0	0	0	0	0	0	0.00107	0.00413	0	0	0	0	0	0	0	0	0
EM356_T3	0	0	0	0	0	0	0	0	0	0	0	0	0	0	0	0	0	0	0	0	0	0	0	0	1.01333	0	0.26701	0.14003	0.2947	10.2986	1.16989	0	0	0	0	0	0	0	0	0	0	0	0	0	0	0	0	0	0
EM357_T0	0	0	0	0	0	0	0	0	0	0	0	0	0	0	0	0	0	0	0	0	0	0	0	0	0.50363	0	1.1651	0	18.3059	0	1.3167	0	0	0	0	0	0	0	0.00433	0	0	0	0	0	0	0	0	0	0
EM361_T6	0	0	0	0	0	0	0	0	0	0	0	0	0	0	0	0	0	0	0	0	0	0	0	0	2.45567	0	0.22262	0	0.53708	2.70001	2.39401	0	0	0	0	0	0	0	0	0	0	0	0	0	0	0	0	0	0
EM362_T3	0	0	0	0	0	0	0	0	0	0	0	0	0	0	0	0	0	0	0	0	0	0	0	0	0	0	0.10237	0.01517	4.5534	0	0.51137	0	0	0	0	0	0	0	0.00625	0	0	0	0	0	0	0	0	0	0
EM364_T0	0	0	0	0	0	0	0	0	0	0	0	0	0	0	0	0	0	0	0	0	0	0	0	0	3.69113	0	0.00522	0.07506	2.02288	7.07253	0.00653	0	0	0	0	0	0	0	0.11285	0	0	0	0	0	0	0	0	0	0
EM367_T0	0	0	0	0	0	0	0	0	0	0	0	0	0	0	0	0	0	0	0	0	0	0	0	0	1.6028	0	0.76147	0.0382	5.01258	11.5352	0.7858	0	0	0	0	0	0	0	0.29171	0	0	0	0	0	0	0	0	0	0
EM369_T3	0	0	0	0	0	0	0	0	0	0	0	0	0	0	0	0	0	0	0	0	0	0	0	0	6.18613	0	0.02274	0.09898	0.0348	3.21049	0	0	0	0	0	0	0	0	0.06716	0	0	0	0	0	0	0	0	0	0
EM370_T0	0	0	0	0	0	0	0	0	0	0	0	0	0	0	0	0	0	0	0	0	0	0	0	0	0	0	0.41231	0	2.54191	5.12889	0.3977	0	0	0	0	0	0	0	0.00543	0	0	0	0	0	0	0	0	0	0
EM371_T3	0	0	0	0	0	0	0	0	0	0	0	0	0	0	0	0	0	0	0	0	0	0	0	0	9.15404	0	0.05064	0	5.89229	10.2483	0.68231	0	0	0	0	0	0	0	0	0.02364	0	0	0	0	0	0	0	0	0
EM372_T3	0	0	0	0	0	0	0	0	0	0	0	0	0	0	0	0	0	0	0	0	0	0	0	0	0	0	0.33521	0.06203	0.87987	4.69006	0.99532	0	0	0	0	0	0	0	0.04493	0	0	0	0	0	0	0	0	0	0
EM374_T3	0	0	0	0	0	0	0	0	0	0	0	0	0	0	0	0	0	0	0	0	0	0	0	0	1.32611	0	0.00522	0	2.69565	0	2.99746	0	0	0	0	0	0	0	0	0.01632	0	0	0	0	0	0	0	0	0
EM376_T3	0	0	0	0	0	0	0	0	0	0	0	0	0	0	0	0	0	0	0	0	0	0	0	0	1.01127	0	1.84547	0.01834	2.50209	4.21322	0	0	0	0	0	0	0	0	0.03111	0	0	0	0	0	0	0	0	0	0
EM381_T6	0	0	0	0	0	0	0	0	0	0	0	0	0	0	0	0	0	0	0	0	0	0	0	0	0.07678	0	1.16429	0	8.61804	2.56727	0.53134	0	0	0	0	0	0	0	0	0	0	0	0	0	0	0	0	0	0
EM384_T3	0	0	0	0	0	0	0	0	0	0	0	0	0	0	0	0	0	0	0	0	0	0	0	0	0.01715	0	0.46897	0	1.88356	9.94868	2.12914	0	0	0	0	0	0	0	0	0	0	0	0	0	0	0	0	0	0
EM388_T3	0	0	0	0	0	0	0	0	0	0	0	0	0	0	0	0	0	0	0	0	0	0	0	0	3.5406	0	1.46962	0.15209	0.24243	4.72275	1.36551	0	0	0	0	0	0	0	0	0.01291	0	0	0	0	0	0	0	0	0
EM389_T6	0	0	0	0	0	0	0	0	0	0	0	0	0	0	0	0	0	0	0	0	0	0	0	0	0	0	0	0	0.31785	0.94147	0	0	0	0	0	0	0	0	0	0	0	0	0	0	0	0	0	0	0
EM394_T3	0	0	0	0	0	0	0	0	0	0	0	0	0	0	0	0	0	0	0	0	0	0	0	0	0.3041	0	0	0	1.00188	0	0	0	0	0	0	0	0	0	0	0.01935	0	0	0	0	0	0	0	0	0
EM399_T0	0	0	0	0	0	0	0	0	0	0	0	0	0	0	0	0	0	0	0	0	0	0	0	0	1.86836	0	0.46379	0.11165	9.22006	6.28873	3.93481	0	0	0	0	0	0	0	0.01453	0	0	0	0	0	0	0	0	0	0
EM409_T0	0	0	0	0	0	0	0	0	0	0	0	0	0	0	0	0	0	0	0	0	0	0	0	0	0.02868	0	0.5921	0.02186	0.66379	0.03944	0.00166	0	0	0	0	0	0	0	0.0017	0	0	0	0	0	0	0	0	0	0
EM410_T0	0	0	0	0	0	0	0	0	0	0	0	0	0	0	0	0	0	0	0	0	0	0	0	0	0.04183	0	44.0448	0	2.50121	7.87574	5.67564	0	0	0	0	0	0	0	0	0	0	0	0	0	0	0	0	0	0
EM413_T3	0	0	0	0	0	0	0	0	0	0	0	0	0	0	0	0	0	0	0	0	0	0	0	0	0	0	0.24054	0.02801	3.82776	4.50633	0	0	0	0	0	0	0	0	0.00707	0	0	0	0	0	0	0	0	0	0
EM416_T0	0	0	0	0	0	0	0	0	0	0	0	0	0	0	0	0	0	0	0	0	0	0	0	0	0.69365	0	0.12494	0	4.28028	6.26014	0.04812	0	0	0	0	0	0	0	0	0	0	0	0	0	0	0	0	0	0
EM422_T3	0	0	0	0	0	0	0	0	0	0	0	0	0	0	0	0	0	0	0	0	0	0	0	0	0	0	0.08415	0.12905	0.30703	7.69691	6.44361	0	0	0	0	0	0	0	0	0	0	0	0	0	0	0	0	0	0
EM433_T0	0	0	0	0	0	0	0	0	0	0	0	0	0	0	0	0	0	0	0	0	0	0	0	0	0.28982	0	0.20568	0	0.00027	13.8976	4.97812	0	0	0	0	0	0	0	0	0	0	0	0	0	0	0	0	0	0
EM438_T3	0	0	0	0	0	0	0	0	0	0	0	0	0	0	0	0	0	0	0	0	0	0	0	0	0	0	0	0	0	0.12829	0	0	0	0	0	0	0	0	0.00426	0.01542	0	0	0	0	0	0	0	0	0
EM442_T3	0	0	0	0	0	0	0	0	0	0	0	0	0	0	0	0	0	0	0	0	0	0	0	0	0.43017	0	0	0.0703	1.72117	3.4354	0.34784	0	0	0	0	0	0	0	0	0	0	0	0	0	0	0	0	0	0
EM448_T0	0	0	0	0	0	0	0	0	0	0	0	0	0	0	0	0	0	0	0	0	0	0	0	0	0.02303	0	0.00923	0	0.24672	6.6663	7.09031	0	0	0	0	0	0	0	0.00618	0	0	0	0	0	0	0	0	0	0
EM125_T3	0	0	0	0	0	0	0	0	0	0	0	0	0	0	0	0	0	0	0	0	0	0	0	0	0	0	0.51377	0	1.54285	4.21814	0.79205	0	0	0	0	0	0	0	0.10276	0	0	0	0	0	0	0	0	0	0
EM126_T3	0	0	0	0	0	0	0	0	0	0	0	0	0	0	0	0	0	0	0	0	0	0	0	0	0	0	0	0	0	0	0	0	0	0	0	0	0	0	0	0.00163	0	0	0	0	0	0	0	0	0
EM133_T3	0	0	0	0	0	0	0	0	0	0	0	0	0	0	0	0	0	0	0	0	0	0	0	0	0.70187	0	0.00128	0.28232	9.0723	9.35416	5.67695	0	0	0	0	0	0	0	0.03805	0	0	0	0	0	0	0	0	0	0
EM136_T0	0	0	0	0	0	0	0	0	0	0	0	0	0	0	0	0	0	0	0	0	0	0	0	0	0.02767	0	0	2.0448	0.59674	13.9298	3.74132	0	0	0	0	0	0	0	0.00145	0.03352	0	0	0	0	0	0	0	0	0
EM137_T6	0	0	0	0	0	0	0	0	0	0	0	0	0	0	0	0	0	0	0	0	0	0	0	0	0.09494	0	0.01537	0.18528	2.09999	10.9469	1.97561	0	0	0	0	0	0	0	0	0	0	0	0	0	0	0	0	0	0
EM138_T0	0	0	0	0	0	0	0	0	0	0	0	0	0	0	0	0	0	0	0	0	0	0	0	0	0.10757	0	0.01744	0.40584	0.22501	1.85356	4.56398	0	0	0	0	0	0	0	0.04687	0.01581	0	0	0	0	0	0	0	0	0
EM142_T3	0	0	0	0	0	0	0	0	0	0	0	0	0	0	0	0	0	0	0	0	0	0	0	0	0.10157	0	0.18025	0	0.00027	0	1.03535	0	0	0	0	0	0	0	0.0018	0.01628	0	0	0	0	0	0	0	0	0
EM144_T3	0	0	0	0	0	0	0	0	0	0	0	0	0	0	0	0	0	0	0	0	0	0	0	0	1.04507	0	0.06105	0.23153	0.00626	5.47576	0.6768	0	0	0	0	0	0	0	0.06841	0	0	0	0	0	0	0	0	0	0
EM145_T6	0	0	0	0	0	0	0	0	0	0	0	0	0	0	0	0	0	0	0	0	0	0	0	0	0.0664	0	0.54629	0	1.51871	10.6836	5.69037	0	0	0	0	0	0	0	0	0.01148	0	0	0	0	0	0	0	0	0
EM146_T3	0	0	0	0	0	0	0	0	0	0	0	0	0	0	0	0	0	0	0	0	0	0	0	0	0	0	0.14786	0	0.21359	5.2591	0.61786	0	0	0	0	0	0	0	0	0.02533	0	0	0	0	0	0	0	0	0
EM148_T0	0	0	0	0	0	0	0	0	0	0	0	0	0	0	0	0	0	0	0	0	0	0	0	0	0.4117	0	0.18244	0.21562	4.54677	6.99667	0.00979	0	0	0	0	0	0	0	0	0.02363	0	0	0	0	0	0	0	0	0
EM152_T0	0	0	0	0	0	0	0	0	0	0	0	0	0	0	0	0	0	0	0	0	0	0	0	0	0	0	0	0.13026	0.73569	0.00732	0.40951	0	0	0	0	0	0	0	0	0.55044	0	0	0	0	0	0	0	0	0
EM156_T3	0	0	0	0	0	0	0	0	0	0	0	0	0	0	0	0	0	0	0	0	0	0	0	0	0	0	2.35759	0	5.67107	0	0	0	0	0	0	0	0	0	0	0.00279	0	0	0	0	0	0	0	0	0
EM163_T0	0	0	0	0	0	0	0	0	0	0	0	0	0	0	0	0	0	0	0	0	0	0	0	0	0	0	0.15536	0.5748	6.46722	0	2.90784	0	0	0	0	0	0	0	0	0.20262	0	0	0	0	0	0	0	0	0
EM166_T0	0	0	0	0	0	0	0	0	0	0	0	0	0	0	0	0	0	0	0	0	0	0	0	0	0	0	6.65325	0	4.78521	0.0056	0.1864	0	0	0	0	0	0	0	0	0	0	0	0	0	0	0	0	0	0
EM166_T3	0	0	0	0	0	0	0	0	0	0	0	0	0	0	0	0	0	0	0	0	0	0	0	0	0	0	6.78308	0	11.2677	0	1.11897	0	0	0	0	0	0	0	0	0.00126	0	0	0	0	0	0	0	0	0
EM170_T0	0	0	0	0	0	0	0	0	0	0	0	0	0	0	0	0	0	0	0	0	0	0	0	0	0	0	0.05118	0.8775	4.41425	0	0.21138	0	0	0	0	0	0	0	0.01721	0.00327	0	0	0	0	0	0	0	0	0
EM179_T0	0	0	0	0	0	0	0	0	0	0	0	0	0	0	0	0	0	0	0	0	0	0	0	0	0.05518	0	0.2067	0	2.60654	0	0	0	0	0	0	0	0	0	0.10199	0	0	0	0	0	0	0	0	0	0
EM183_T6	0	0	0	0	0	0	0	0	0	0	0	0	0	0	0	0	0	0	0	0	0	0	0	0	1.37371	0	0.655	0.57168	30.4173	8.82541	0.28664	0	0	0	0	0	0	0	0	0	0	0	0	0	0	0	0	0	0
EM184_T3	0	0	0	0	0	0	0	0	0	0	0	0	0	0	0	0	0	0	0	0	0	0	0	0	1.19025	0	0	0.61262	3.01716	0	8.08359	0	0	0	0	0	0	0	0	0.02253	0	0	0	0	0	0	0	0	0
EM187_T0	0	0	0	0	0	0	0	0	0	0	0	0	0	0	0	0	0	0	0	0	0	0	0	0	0.07774	0	0	0	0	0	5.63988	0	0	0	0	0	0	0	0.06795	0.02931	0	0	0	0	0	0	0	0	0
EM188_T6	0	0	0	0	0	0	0	0	0	0	0	0	0	0	0	0	0	0	0	0	0	0	0	0	0.02772	0	0	0.66899	7.15525	0	0	0	0	0	0	0	0	0	0.00293	0.01007	0	0	0	0	0	0	0	0	0
EM189_T3	0	0	0	0	0	0	0	0	0	0	0	0	0	0	0	0	0	0	0	0	0	0	0	0	8.38161	0	0.61091	0	0.0276	3.47508	9.90553	0	0	0	0	0	0	0	0.01931	0.01606	0	0	0	0	0	0	0	0	0
EM190_T0	0	0	0	0	0	0	0	0	0	0	0	0	0	0	0	0	0	0	0	0	0	0	0	0	0.12124	0	0.25666	1.33366	0.15827	8.19618	3.79897	0	0	0	0	0	0	0	0.00793	0	0	0	0	0	0	0	0	0	0
EM191_T0	0	0	0	0	0	0	0	0	0	0	0	0	0	0	0	0	0	0	0	0	0	0	0	0	0	0	0.27758	0.00616	0.69899	0.02748	0.01888	0	0	0	0	0	0	0	0	0.01817	0	0	0	0	0	0	0	0	0
EM196_T6	0	0	0	0	0	0	0	0	0	0	0	0	0	0	0	0	0	0	0	0	0	0	0	0	0.12999	0	0.33516	0.30797	19.6932	3.7516	3.08873	0	0	0	0	0	0	0	0.02122	0	0	0	0	0	0	0	0	0	0
EM208_T0	0	0	0	0	0	0	0	0	0	0	0	0	0	0	0	0	0	0	0	0	0	0	0	0	2.82418	0	0	0	0.00406	0	0	0	0	0	0	0	0	0	0.45106	0.09901	0	0	0	0	0	0	0	0	0
EM209_T0	0	0	0	0	0	0	0	0	0	0	0	0	0	0	0	0	0	0	0	0	0	0	0	0	0	0	0.64489	1.60425	0.91145	12.497	1.62785	0	0	0	0	0	0	0	0.02294	0	0	0	0	0	0	0	0	0	0
EM211_T6	0	0	0	0	0	0	0	0	0	0	0	0	0	0	0	0	0	0	0	0	0	0	0	0	0	0	0.14851	1.53614	1.63024	5.15911	5.36843	0	0	0	0	0	0	0	0.01427	0.00488	0	0	0	0	0	0	0	0	0
EM217_T6	0	0	0	0	0	0	0	0	0	0	0	0	0	0	0	0	0	0	0	0	0	0	0	0	2.3878	0	1.15965	0	21.3998	6.50376	0	0	0	0	0	0	0	0	0	0.00282	0	0	0	0	0	0	0	0	0
EM219_T0	0	0	0	0	0	0	0	0	0	0	0	0	0	0	0	0	0	0	0	0	0	0	0	0	0.70249	0	2.29425	0.11698	1.26178	3.00838	0.64098	0	0	0	0	0	0	0	0	0.11897	0	0	0	0	0	0	0	0	0
EM220_T6	0	0	0	0	0	0	0	0	0	0	0	0	0	0	0	0	0	0	0	0	0	0	0	0	0.21291	0	1.41893	0	7.69794	0	0.00185	0	0	0	0	0	0	0	0	0.04701	0	0	0	0	0	0	0	0	0
EM221_T0	0	0	0	0	0	0	0	0	0	0	0	0	0	0	0	0	0	0	0	0	0	0	0	0	0	0	0	0.042	0.21807	0.84443	0.73922	0	0	0	0	0	0	0	0	0.00229	0	0	0	0	0	0	0	0	0
EM227_T0	0	0	0	0	0	0	0	0	0	0	0	0	0	0	0	0	0	0	0	0	0	0	0	0	0.02318	0	0.01137	0.13546	9.68286	0	1.08865	0	0	0	0	0	0	0	0.0712	0	0	0	0	0	0	0	0	0	0
EM232_T0	0	0	0	0	0	0	0	0	0	0	0	0	0	0	0	0	0	0	0	0	0	0	0	0	1.37909	0	0.67326	1.11024	0.02762	5.4138	2.46341	0	0	0	0	0	0	0	0.00489	0	0	0	0	0	0	0	0	0	0
EM233_T6	0	0	0	0	0	0	0	0	0	0	0	0	0	0	0	0	0	0	0	0	0	0	0	0	0.24616	0	2.8884	0	0	7.29891	1.65417	0	0	0	0	0	0	0	0	0	0	0	0	0	0	0	0	0	0
EM236_T0	0	0	0	0	0	0	0	0	0	0	0	0	0	0	0	0	0	0	0	0	0	0	0	0	0.00521	0	0.4036	0.12117	0.73692	2.35266	1.67535	0	0	0	0	0	0	0	0	0.08517	0	0	0	0	0	0	0	0	0
EM238_T0	0	0	0	0	0	0	0	0	0	0	0	0	0	0	0	0	0	0	0	0	0	0	0	0	0.08803	0	0.45641	0.23466	25.0816	0	0	0	0	0	0	0	0	0	0.00022	0.41605	0	0	0	0	0	0	0	0	0
EM242_T0	0	0	0	0	0	0	0	0	0	0	0	0	0	0	0	0	0	0	0	0	0	0	0	0	10.6065	0	0.09584	0	4.70152	0.04082	0.40406	0	0	0	0	0	0	0	0.00039	0	0	0	0	0	0	0	0	0	0
EM249_T0	0	0	0	0	0	0	0	0	0	0	0	0	0	0	0	0	0	0	0	0	0	0	0	0	0.00898	0	0.08145	0.79074	1.23822	10.5255	2.31142	0	0	0	0	0	0	0	0	0.00366	0	0	0	0	0	0	0	0	0
EM274_T0	0	0	0	0	0	0	0	0	0	0	0	0	0	0	0	0	0	0	0	0	0	0	0	0	0	0	0.14937	0.71998	0.03657	3.16822	1.25658	0	0	0	0	0	0	0	0.57663	0	0	0	0	0	0	0	0	0	0
EM275_T0	0	0	0	0	0	0	0	0	0	0	0	0	0	0	0	0	0	0	0	0	0	0	0	0	0	0	0.56331	0.20088	5.58478	0	1.43583	0	0	0	0	0	0	0	0.00058	0	0	0	0	0	0	0	0	0	0
EM284_T0	0	0	0	0	0	0	0	0	0	0	0	0	0	0	0	0	0	0	0	0	0	0	0	0	0	0	0	0	0	0.00605	0	0	0	0	0	0	0	0	0	0.31816	0	0	0	0	0	0	0	0	0
EM291_T0	0	0	0	0	0	0	0	0	0	0	0	0	0	0	0	0	0	0	0	0	0	0	0	0	0.68695	0	0.25612	0.31166	12.8856	3.73834	1.67471	0	0	0	0	0	0	0	0.00396	0.01274	0	0	0	0	0	0	0	0	0
EM293_T0	0	0	0	0	0	0	0	0	0	0	0	0	0	0	0	0	0	0	0	0	0	0	0	0	0.17201	0	0.47016	0.63279	1.59154	0	0.00265	0	0	0	0	0	0	0	0.04287	0.04224	0	0	0	0	0	0	0	0	0
EM298_T0	0	0	0	0	0	0	0	0	0	0	0	0	0	0	0	0	0	0	0	0	0	0	0	0	0.09993	0	1.85782	0	14.8911	0.05685	4.32746	0	0	0	0	0	0	0	0.00118	0.01888	0	0	0	0	0	0	0	0	0
EM301_T3	0	0	0	0	0	0	0	0	0	0	0	0	0	0	0	0	0	0	0	0	0	0	0	0	2.60516	0	0.0993	0.00685	0.43457	7.91975	2.76824	0	0	0	0	0	0	0	0.03009	0	0	0	0	0	0	0	0	0	0
EM305_T0	0	0	0	0	0	0	0	0	0	0	0	0	0	0	0	0	0	0	0	0	0	0	0	0	1.79624	0	1.88444	0.07846	0.12177	10.8992	1.08812	0	0	0	0	0	0	0	0.13403	0	0	0	0	0	0	0	0	0	0
EM308_T0	0	0	0	0	0	0	0	0	0	0	0	0	0	0	0	0	0	0	0	0	0	0	0	0	0	0	0.21132	0.10534	4.46835	0.0163	0.58706	0	0	0	0	0	0	0	0	0.03443	0	0	0	0	0	0	0	0	0
EM316_T3	0	0	0	0	0	0	0	0	0	0	0	0	0	0	0	0	0	0	0	0	0	0	0	0	0	0	0.16998	0	7.67358	0	0.00366	0	0	0	0	0	0	0	0.01244	0	0	0	0	0	0	0	0	0	0
EM326_T0	0	0	0	0	0	0	0	0	0	0	0	0	0	0	0	0	0	0	0	0	0	0	0	0	7.80093	0	0.0347	0.04294	0.24012	6.37378	1.02974	0	0	0	0	0	0	0	0	0	0	0	0	0	0	0	0	0	0
EM337_T0	0	0	0	0	0	0	0	0	0	0	0	0	0	0	0	0	0	0	0	0	0	0	0	0	0	0	0.00459	0.00641	0.04502	0.01348	0.033	0	0	0	0	0	0	0	0.02488	0	0	0	0	0	0	0	0	0	0
EM338_T0	0	0	0	0	0	0	0	0	0	0	0	0	0	0	0	0	0	0	0	0	0	0	0	0	0.0008	0	0.04547	0.10183	0.24057	7.35979	3.1875	0	0	0	0	0	0	0	0.19625	0.00786	0	0	0	0	0	0	0	0	0
[truncated: 787 more columns]
