# Supplementary material for: Adjusting for age improves identification of gut microbiome alterations in multiple diseases
Source: eLife. 2020 Mar 11;9:e50240. doi: 10.7554/eLife.50240 (PMC7065848; doi:10.7554/eLife.50240)
Supplement: Supplementary file 3. [file elife-50240-supp3.xlsx]

## Sheet: Sheet1
Supplementary File 3: Comparison of the abundances of the G1-G3 and L1-L3 markers in patients (of the FranzosaEA_2018 cohort) with and without different medication intakes as: (A) For patients with and without Mesalamine (B) For patients with and without Immunosuppressants (C) For patients with and without Steroids

## Sheet: Mesalamine
	Direction (1: High in treatment; -1: Low in treatment)	FDR-corrected P-value
Peptostreptococcaceae_noname_unclassified	-1	0.0122074
Coprococcus_comes	1	0.0536812
Eggerthella_lenta	1	0.254499
Subdoligranulum_unclassified	1	0.323076
Clostridium_clostridioforme	-1	0.427531
Akkermansia_muciniphila	-1	0.638256
Fusobacterium_nucleatum	-1	0.669888
Ruminococcus_gnavus	-1	0.711886
Clostridium_ramosum	-1	0.872862
Alistipes_indistinctus	-1	1
Alistipes_onderdonkii	1	1
Alistipes_putredinis	-1	1
Alistipes_senegalensis	1	1
Alistipes_shahii	-1	1
Bacteroidales_bacterium_ph8	-1	1
Bacteroides_fragilis	1	1
Bacteroides_uniformis	1	1
Bacteroides_xylanisolvens	1	1
Barnesiella_intestinihominis	-1	1
Bifidobacterium_dentium	1	1
Bifidobacterium_longum	1	1
Clostridiales_bacterium_1_7_47FAA	-1	1
Clostridium_asparagiforme	-1	1
Clostridium_bolteae	-1	1
Clostridium_hathewayi	-1	1
Clostridium_symbiosum	-1	1
Coprobacillus_unclassified	-1	1
Coprococcus_catus	1	1
Dorea_longicatena	1	1
Erysipelotrichaceae_bacterium_2_2_44A	-1	1
Erysipelotrichaceae_bacterium_21_3	-1	1
Escherichia_coli	-1	1
Eubacterium_hallii	1	1
Eubacterium_rectale	1	1
Eubacterium_siraeum	-1	1
Lactobacillus_salivarius	1	1
Odoribacter_splanchnicus	1	1
Prevotella_copri	1	1
Roseburia_hominis	1	1
Rothia_mucilaginosa	-1	1
Ruminococcus_torques	-1	1
Streptococcus_parasanguinis	-1	1
Streptococcus_salivarius	-1	1
Streptococcus_sanguinis	-1	1
Streptococcus_vestibularis	-1	1
Subdoligranulum_sp_4_3_54A2FAA	-1	1

## Sheet: Immunosuppresants
	Direction (1: High in treatment; -1: Low in treatment)	FDR-corrected P-value
Barnesiella_intestinihominis	-1	0.04598
Clostridium_ramosum	1	0.431335
Odoribacter_splanchnicus	-1	0.542219
Clostridium_clostridioforme	1	0.960279
Akkermansia_muciniphila	1	1
Alistipes_indistinctus	-1	1
Alistipes_onderdonkii	1	1
Alistipes_putredinis	1	1
Alistipes_senegalensis	-1	1
Alistipes_shahii	-1	1
Bacteroidales_bacterium_ph8	-1	1
Bacteroides_fragilis	-1	1
Bacteroides_uniformis	1	1
Bacteroides_xylanisolvens	1	1
Bifidobacterium_dentium	-1	1
Bifidobacterium_longum	1	1
Clostridiales_bacterium_1_7_47FAA	1	1
Clostridium_asparagiforme	1	1
Clostridium_bolteae	1	1
Clostridium_hathewayi	1	1
Clostridium_symbiosum	1	1
Coprobacillus_unclassified	1	1
Coprococcus_catus	-1	1
Coprococcus_comes	-1	1
Dorea_longicatena	1	1
Eggerthella_lenta	-1	1
Erysipelotrichaceae_bacterium_2_2_44A	1	1
Erysipelotrichaceae_bacterium_21_3	-1	1
Escherichia_coli	1	1
Eubacterium_hallii	-1	1
Eubacterium_rectale	-1	1
Eubacterium_siraeum	-1	1
Fusobacterium_nucleatum	-1	1
Lactobacillus_salivarius	1	1
Peptostreptococcaceae_noname_unclassified	1	1
Prevotella_copri	-1	1
Roseburia_hominis	-1	1
Rothia_mucilaginosa	-1	1
Ruminococcus_gnavus	1	1
Ruminococcus_torques	-1	1
Streptococcus_parasanguinis	-1	1
Streptococcus_salivarius	-1	1
Streptococcus_sanguinis	1	1
Streptococcus_vestibularis	1	1
Subdoligranulum_sp_4_3_54A2FAA	1	1
Subdoligranulum_unclassified	-1	1

## Sheet: Steroids
	Direction (1: High in treatment; -1: Low in treatment)	FDR-corrected P-value
Bacteroides_uniformis	-1	0.51959
Eubacterium_siraeum	-1	0.842981
Akkermansia_muciniphila	1	1
Alistipes_indistinctus	-1	1
Alistipes_onderdonkii	1	1
Alistipes_putredinis	-1	1
Alistipes_senegalensis	-1	1
Alistipes_shahii	-1	1
Bacteroidales_bacterium_ph8	-1	1
Bacteroides_fragilis	-1	1
Bacteroides_xylanisolvens	-1	1
Barnesiella_intestinihominis	-1	1
Bifidobacterium_dentium	1	1
Bifidobacterium_longum	-1	1
Clostridiales_bacterium_1_7_47FAA	1	1
Clostridium_asparagiforme	1	1
Clostridium_bolteae	1	1
Clostridium_clostridioforme	1	1
Clostridium_hathewayi	1	1
Clostridium_ramosum	-1	1
Clostridium_symbiosum	1	1
Coprobacillus_unclassified	1	1
Coprococcus_catus	1	1
Coprococcus_comes	-1	1
Dorea_longicatena	-1	1
Eggerthella_lenta	-1	1
Erysipelotrichaceae_bacterium_2_2_44A	1	1
Erysipelotrichaceae_bacterium_21_3	1	1
Escherichia_coli	-1	1
Eubacterium_hallii	1	1
Eubacterium_rectale	-1	1
Fusobacterium_nucleatum	1	1
Lactobacillus_salivarius	-1	1
Odoribacter_splanchnicus	-1	1
Peptostreptococcaceae_noname_unclassified	1	1
Prevotella_copri	1	1
Roseburia_hominis	-1	1
Rothia_mucilaginosa	1	1
Ruminococcus_gnavus	1	1
Ruminococcus_torques	-1	1
Streptococcus_parasanguinis	1	1
Streptococcus_salivarius	1	1
Streptococcus_sanguinis	1	1
Streptococcus_vestibularis	1	1
Subdoligranulum_sp_4_3_54A2FAA	-1	1
Subdoligranulum_unclassified	-1	1
